# Supplementary material for: Architecture of genome-wide transcriptional regulatory network reveals dynamic functions and evolutionary trajectories in Pseudomonas syringae
Source: eLife journal article supplement (doi:10.7554/elife.96172), 2024-03-16
Supplement: fig3-figsupp1-data1 [file elife-96172-fig3-figsupp1-data1-v1.zip]

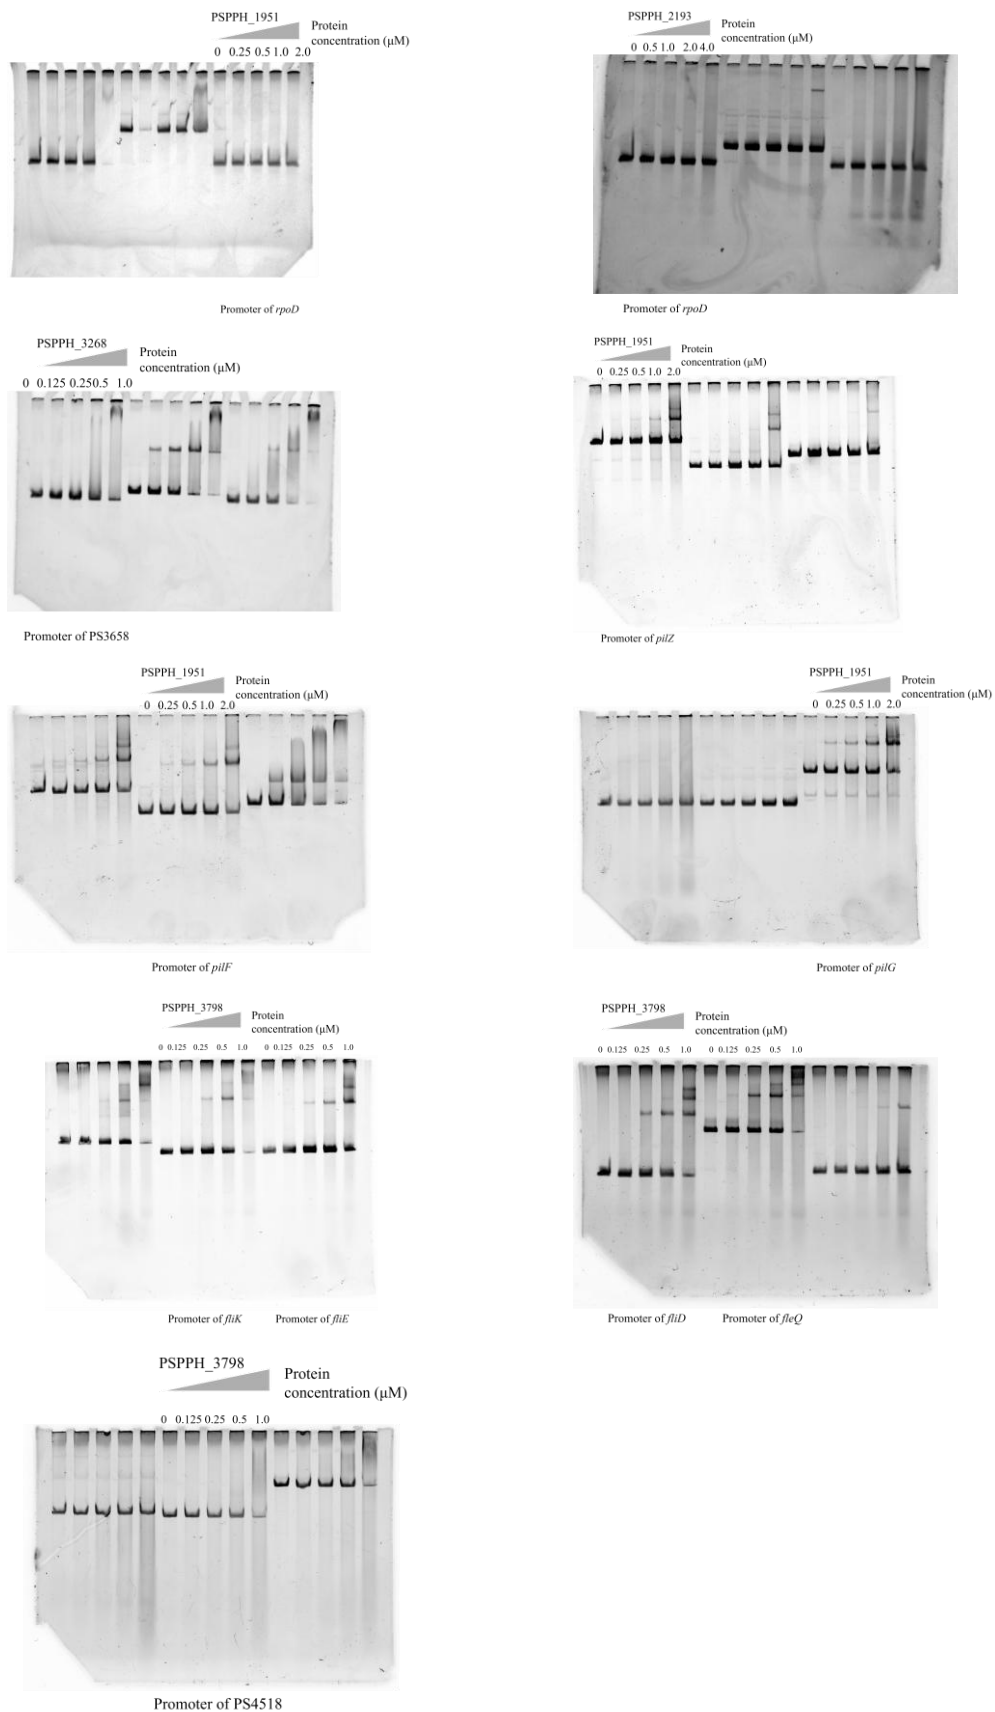

**Figure 3-figure supplement 1-source data 1.** Original gels corresponding to Figure 3-figure supplement 1-a-c, e and g. Protein concentration were labelled for EMSA.
