# Supplementary material for: Architecture of genome-wide transcriptional regulatory network reveals dynamic functions and evolutionary trajectories in Pseudomonas syringae
Source: eLife. 2025 Mar 31;13:RP96172. doi: 10.7554/eLife.96172 (PMC11957545; doi:10.7554/eLife.96172)
Supplement: Supplementary file 4. [file elife-96172-supp4.xlsx]

## Sheet: S Table 4
Supplementary Table 4. Homologous proteins in three strains (DC3000, B728a and C48) with 1448A and binding peaks of five TFs (Irp, X2193, X2193, X4127 and OmpR).
1448A_ID	DC3000_ID	B728a_ID	CN228_ID	TFs binding to promoter in 1448A	TFs binding to promoter in DC3000	TFs binding to promoter in B728a	TFs binding to promoter in CN228	TFs binding to promoter in all 4 strains	Number of TFs in 1448A	Number of TFs in DC3000	Number of TFs in B728a	Number of TFs in CN228	Average number of TFs
PSPPH_0001	PSPTO_0001	Psyr_0001	CN228_RS00005	PSPPH_Irp,PSPPH_OmpR	DC3000_Irp,DC3000_2193				2	2	0	0	1
PSPPH_0002	PSPTO_0002	Psyr_0002	CN228_RS00010	PSPPH_2193	DC3000_Irp,DC3000_2193,DC3000_3122,DC3000_4127		CN228_Irp		1	4	0	1	1.5
PSPPH_0003	PSPTO_0003	Psyr_0003	CN228_RS00015	PSPPH_4127	DC3000_Irp,DC3000_4127	B728a_2193	CN228_OmpR		1	2	1	1	1.25
PSPPH_0004	PSPTO_0004	Psyr_0004	CN228_RS00020	PSPPH_2193	DC3000_Irp,DC3000_2193,DC3000_3122,DC3000_4127,DC3000_OmpR				1	5	0	0	1.5
PSPPH_0005	PSPTO_2519	Psyr_2637	CN228_RS19745	PSPPH_Irp,PSPPH_2193					2	0	0	0	0.5
PSPPH_0006									0	0	0	0	0
PSPPH_0007	PSPTO_0009	Psyr_0007	CN228_RS31845		DC3000_2193,DC3000_4127				0	2	0	0	0.5
PSPPH_0008	PSPTO_0181	Psyr_0015	CN228_RS31895	PSPPH_Irp					1	0	0	0	0.25
PSPPH_0009	PSPTO_0187	Psyr_0009	CN228_RS31855						0	0	0	0	0
PSPPH_0010	PSPTO_0186	Psyr_0010	CN228_RS31860						0	0	0	0	0
PSPPH_0011	PSPTO_0185	Psyr_0011	CN228_RS31865						0	0	0	0	0
PSPPH_0012	PSPTO_0184	Psyr_0012	CN228_RS31870						0	0	0	0	0
PSPPH_0013	PSPTO_0183	Psyr_0013	CN228_RS31875						0	0	0	0	0
PSPPH_0014	PSPTO_0182	Psyr_0014	CN228_RS31880						0	0	0	0	0
PSPPH_0015	PSPTO_4027	Psyr_4726	CN228_RS04120						0	0	0	0	0
PSPPH_0016	PSPTO_0009	Psyr_0007	CN228_RS31845						0	0	0	0	0
PSPPH_0017	PSPTO_0181	Psyr_0015	CN228_RS31895						0	0	0	0	0
PSPPH_0018	PSPTO_0180	Psyr_0016	CN228_RS31900						0	0	0	0	0
PSPPH_0019	PSPTO_0179	Psyr_0017	CN228_RS31905	PSPPH_4127	DC3000_Irp,DC3000_4127		CN228_4127		1	2	0	1	1
PSPPH_0020	PSPTO_0178	Psyr_0018	CN228_RS31910	PSPPH_3122					1	0	0	0	0.25
PSPPH_0021	PSPTO_0177	Psyr_0019	CN228_RS31915						0	0	0	0	0
PSPPH_0022	PSPTO_0176	Psyr_0020	CN228_RS31920	PSPPH_Irp,PSPPH_OmpR					2	0	0	0	0.5
PSPPH_0023	PSPTO_0175	Psyr_0021	CN228_RS31925	PSPPH_Irp,PSPPH_3122	DC3000_4127	B728a_OmpR	CN228_4127		2	1	1	1	1.25
PSPPH_0024	PSPTO_0174	Psyr_0022	CN228_RS31930						0	0	0	0	0
PSPPH_0025	PSPTO_0173	Psyr_0023	CN228_RS31935						0	0	0	0	0
PSPPH_0026	PSPTO_0170	Psyr_0024	CN228_RS31940						0	0	0	0	0
PSPPH_0027	PSPTO_0169	Psyr_0025	CN228_RS31945						0	0	0	0	0
PSPPH_0028	PSPTO_0168	Psyr_0026	CN228_RS31950		DC3000_2193,DC3000_4127				0	2	0	0	0.5
PSPPH_0029	PSPTO_0166	Psyr_0028	CN228_RS31955						0	0	0	0	0
PSPPH_0030	PSPTO_0165	Psyr_0029	CN228_RS31960						0	0	0	0	0
PSPPH_0031	PSPTO_0164	Psyr_0030	CN228_RS31965						0	0	0	0	0
PSPPH_0032	PSPTO_0163	Psyr_0132	CN228_RS31990		DC3000_Irp,DC3000_2193,DC3000_4127				0	3	0	0	0.75
PSPPH_0033	PSPTO_0162	Psyr_0031	CN228_RS31995						0	0	0	0	0
PSPPH_0034	PSPTO_0161	Psyr_0032	CN228_RS32000						0	0	0	0	0
PSPPH_0035	PSPTO_0159	Psyr_0033	CN228_RS32005						0	0	0	0	0
PSPPH_0036	PSPTO_0158	Psyr_0034	CN228_RS32010						0	0	0	0	0
PSPPH_0037	PSPTO_0157	Psyr_0035	CN228_RS32015						0	0	0	0	0
PSPPH_0038	PSPTO_0156	Psyr_0036	CN228_RS32020						0	0	0	0	0
PSPPH_0039	PSPTO_0155	Psyr_0037	CN228_RS32025						0	0	0	0	0
PSPPH_0040	PSPTO_0154	Psyr_0038	CN228_RS32030						0	0	0	0	0
PSPPH_0041	PSPTO_0153	Psyr_0039	CN228_RS32035						0	0	0	0	0
PSPPH_0042	PSPTO_0152	Psyr_0040	CN228_RS32040						0	0	0	0	0
PSPPH_0043	PSPTO_0151	Psyr_0041	CN228_RS32045		DC3000_4127				0	1	0	0	0.25
PSPPH_0044	PSPTO_0150	Psyr_0042	CN228_RS32050	PSPPH_4127	DC3000_2193,DC3000_4127				1	2	0	0	0.75
PSPPH_0045									0	0	0	0	0
PSPPH_0046	PSPTO_2135	Psyr_3887	CN228_RS22685						0	0	0	0	0
PSPPH_0047									0	0	0	0	0
PSPPH_0048	PSPTO_0146	Psyr_0043	CN228_RS32060						0	0	0	0	0
PSPPH_0049	PSPTO_2135	Psyr_3887	CN228_RS22685						0	0	0	0	0
PSPPH_0050	PSPTO_0145	Psyr_0044	CN228_RS32070						0	0	0	0	0
PSPPH_0051	PSPTO_0144	Psyr_0045	CN228_RS32075						0	0	0	0	0
PSPPH_0052	PSPTO_0143	Psyr_0046	CN228_RS32080			B728a_4127			0	0	1	0	0.25
PSPPH_0053	PSPTO_0142	Psyr_0048	CN228_RS32085	PSPPH_Irp,PSPPH_2193	DC3000_Irp,DC3000_2193,DC3000_4127				2	3	0	0	1.25
PSPPH_0054	PSPTO_0141	Psyr_0049	CN228_RS32090		DC3000_OmpR	B728a_OmpR			0	1	1	0	0.5
PSPPH_0055	PSPTO_0140	Psyr_0050	CN228_RS32105						0	0	0	0	0
PSPPH_0056	PSPTO_0139	Psyr_0051	CN228_RS32110						0	0	0	0	0
PSPPH_0057	PSPTO_0138	Psyr_0052	CN228_RS32115						0	0	0	0	0
PSPPH_0058	PSPTO_0137	Psyr_0053	CN228_RS32120						0	0	0	0	0
PSPPH_0059	PSPTO_0136	Psyr_0054	CN228_RS32125	PSPPH_4127		B728a_4127			1	0	1	0	0.5
PSPPH_0060	PSPTO_0135	Psyr_0055	CN228_RS32135		DC3000_4127				0	1	0	0	0.25
PSPPH_0061	PSPTO_0134	Psyr_0056	CN228_RS32140						0	0	0	0	0
PSPPH_0062	PSPTO_0133	Psyr_0057	CN228_RS32145						0	0	0	0	0
PSPPH_0063	PSPTO_0132	Psyr_0058	CN228_RS32150						0	0	0	0	0
PSPPH_0064	PSPTO_0131	Psyr_0059	CN228_RS32155		DC3000_Irp		CN228_Irp		0	1	0	1	0.5
PSPPH_0065	PSPTO_0130	Psyr_0060	CN228_RS32160	PSPPH_4127					1	0	0	0	0.25
PSPPH_0066	PSPTO_0129	Psyr_0061	CN228_RS32165						0	0	0	0	0
PSPPH_0067	PSPTO_0128	Psyr_0062	CN228_RS32170						0	0	0	0	0
PSPPH_0068	PSPTO_2284	Psyr_0068	CN228_RS26305						0	0	0	0	0
PSPPH_0069	PSPTO_0127	Psyr_0063	CN228_RS32175		DC3000_2193				0	1	0	0	0.25
PSPPH_0070	PSPTO_0126	Psyr_0064	CN228_RS32180						0	0	0	0	0
PSPPH_0071	PSPTO_0125	Psyr_0065	CN228_RS32185		DC3000_Irp				0	1	0	0	0.25
PSPPH_0072	PSPTO_0121	Psyr_0066	CN228_RS32190						0	0	0	0	0
PSPPH_0073	PSPTO_0120	Psyr_0067	CN228_RS32195		DC3000_Irp				0	1	0	0	0.25
PSPPH_0074	PSPTO_0119	Psyr_0068	CN228_RS32200	PSPPH_4127	DC3000_4127				1	1	0	0	0.5
PSPPH_0075	PSPTO_0118	Psyr_0069	CN228_RS32205						0	0	0	0	0
PSPPH_0076	PSPTO_0117	Psyr_0071	CN228_RS30040			B728a_2193,B728a_OmpR			0	0	2	0	0.5
PSPPH_0077	PSPTO_0116	Psyr_0072	CN228_RS30045						0	0	0	0	0
PSPPH_0078	PSPTO_0115	Psyr_0073	CN228_RS30050						0	0	0	0	0
PSPPH_0079	PSPTO_0114	Psyr_0074	CN228_RS30055			B728a_OmpR			0	0	1	0	0.25
PSPPH_0080	PSPTO_0113	Psyr_0075	CN228_RS30060						0	0	0	0	0
PSPPH_0081	PSPTO_0112	Psyr_0076	CN228_RS30065						0	0	0	0	0
PSPPH_0082	PSPTO_0111	Psyr_0077	CN228_RS30070						0	0	0	0	0
PSPPH_0083	PSPTO_0110	Psyr_0078	CN228_RS30075						0	0	0	0	0
PSPPH_0084	PSPTO_0109	Psyr_0079	CN228_RS30080						0	0	0	0	0
PSPPH_0085	PSPTO_0108	Psyr_0080	CN228_RS30085						0	0	0	0	0
PSPPH_0086	PSPTO_0311	Psyr_0081	CN228_RS30555						0	0	0	0	0
PSPPH_0087	PSPTO_0310	Psyr_0082	CN228_RS30560						0	0	0	0	0
PSPPH_0088	PSPTO_0309	Psyr_0083	CN228_RS30565	PSPPH_Irp	DC3000_Irp				1	1	0	0	0.5
PSPPH_0089	PSPTO_0308	Psyr_0084	CN228_RS30570						0	0	0	0	0
PSPPH_0090	PSPTO_0307	Psyr_0085	CN228_RS30575	PSPPH_2193					1	0	0	0	0.25
PSPPH_0091	PSPTO_0306	Psyr_0086	CN228_RS30580	PSPPH_Irp,PSPPH_OmpR			CN228_Irp		2	0	0	1	0.75
PSPPH_0092	PSPTO_0305	Psyr_0087	CN228_RS30585		DC3000_Irp,DC3000_2193,DC3000_4127				0	3	0	0	0.75
PSPPH_0093	PSPTO_0304	Psyr_0088	CN228_RS30590						0	0	0	0	0
PSPPH_0094	PSPTO_0303	Psyr_0089	CN228_RS30605	PSPPH_Irp,PSPPH_2193,PSPPH_4127		B728a_Irp,B728a_4127	CN228_Irp		3	0	2	1	1.5
PSPPH_0095	PSPTO_0301	Psyr_0090	CN228_RS30615						0	0	0	0	0
PSPPH_0096	PSPTO_0300	Psyr_0091	CN228_RS30620						0	0	0	0	0
PSPPH_0097	PSPTO_0299	Psyr_0093	CN228_RS30630						0	0	0	0	0
PSPPH_0098									0	0	0	0	0
PSPPH_0099	PSPTO_0535	Psyr_2035	CN228_RS14680		DC3000_Irp,DC3000_4127				0	2	0	0	0.5
PSPPH_0100	PSPTO_0192	Psyr_2506	CN228_RS15350		DC3000_3122,DC3000_4127				0	2	0	0	0.5
PSPPH_0101	PSPTO_0033	Psyr_4121	CN228_RS23315		DC3000_Irp,DC3000_2193,DC3000_3122,DC3000_4127				0	4	0	0	1
PSPPH_0102	PSPTO_0032	Psyr_5033	CN228_RS08590		DC3000_Irp,DC3000_2193,DC3000_4127				0	3	0	0	0.75
PSPPH_0103	PSPTO_1094	Psyr_4393	CN228_RS25365	PSPPH_4127	DC3000_2193				1	1	0	0	0.5
PSPPH_0104	PSPTO_5448	Psyr_2792	CN228_RS25695		DC3000_4127				0	1	0	0	0.25
PSPPH_0105	PSPTO_4324	Psyr_1798	CN228_RS15200	PSPPH_4127,PSPPH_OmpR	DC3000_Irp,DC3000_2193				2	2	0	0	1
PSPPH_0106	PSPTO_0569	Psyr_2378	CN228_RS02460		DC3000_Irp				0	1	0	0	0.25
PSPPH_0107	PSPTO_2040	Psyr_1850	CN228_RS11610	PSPPH_3122					1	0	0	0	0.25
PSPPH_0108	PSPTO_0283	Psyr_0114	CN228_RS19765	PSPPH_Irp					1	0	0	0	0.25
PSPPH_0109	PSPTO_0282	Psyr_0115	CN228_RS23260						0	0	0	0	0
PSPPH_0110	PSPTO_0667	Psyr_0120	CN228_RS03030		DC3000_2193				0	1	0	0	0.25
PSPPH_0111	PSPTO_1367	Psyr_2800	CN228_RS06900						0	0	0	0	0
PSPPH_0112	PSPTO_0668	Psyr_3078	CN228_RS03035		DC3000_2193	B728a_4127			0	1	1	0	0.5
PSPPH_0113	PSPTO_4735	Psyr_1970	CN228_RS08410		DC3000_Irp,DC3000_2193,DC3000_3122,DC3000_4127				0	4	0	0	1
PSPPH_0114	PSPTO_3208	Psyr_0096	CN228_RS17870						0	0	0	0	0
PSPPH_0115	PSPTO_0674	Psyr_4972	CN228_RS03055		DC3000_2193				0	1	0	0	0.25
PSPPH_0116	PSPTO_2951	Psyr_4972	CN228_RS08645	PSPPH_Irp,PSPPH_4127					2	0	0	0	0.5
PSPPH_0117	PSPTO_3486	Psyr_4970	CN228_RS02110		DC3000_Irp,DC3000_2193,DC3000_4127				0	3	0	0	0.75
PSPPH_0118	PSPTO_0479	Psyr_4969	CN228_RS01010	PSPPH_4127	DC3000_Irp,DC3000_2193				1	2	0	0	0.75
PSPPH_0119	PSPTO_2135	Psyr_3887	CN228_RS22685	PSPPH_Irp					1	0	0	0	0.25
PSPPH_0120									0	0	0	0	0
PSPPH_0121	PSPTO_4850	Psyr_4966	CN228_RS01015						0	0	0	0	0
PSPPH_0122	PSPTO_4345	Psyr_4965	CN228_RS01020		DC3000_Irp,DC3000_2193,DC3000_4127		CN228_Irp		0	3	0	1	1
PSPPH_0123	PSPTO_1164	Psyr_4964	CN228_RS01025				CN228_Irp		0	0	0	1	0.25
PSPPH_0124	PSPTO_2859	Psyr_4963	CN228_RS24510		DC3000_2193,DC3000_4127				0	2	0	0	0.5
PSPPH_0125	PSPTO_5005	Psyr_4962	CN228_RS28355						0	0	0	0	0
PSPPH_0126	PSPTO_1889	Psyr_4961	CN228_RS17565						0	0	0	0	0
PSPPH_0127	PSPTO_3036	Psyr_4960	CN228_RS17570				CN228_4127		0	0	0	1	0.25
PSPPH_0128	PSPTO_3233	Psyr_4959	CN228_RS17025		DC3000_Irp				0	1	0	0	0.25
PSPPH_0129	PSPTO_5425	Psyr_4958	CN228_RS13035		DC3000_Irp				0	1	0	0	0.25
PSPPH_0130	PSPTO_2548	Psyr_4957	CN228_RS04420						0	0	0	0	0
PSPPH_0131	PSPTO_3314	Psyr_4956	CN228_RS17600	PSPPH_Irp	DC3000_4127				1	1	0	0	0.5
PSPPH_0132	PSPTO_4970	Psyr_4955	CN228_RS18205		DC3000_2193,DC3000_4127				0	2	0	0	0.5
PSPPH_0133	PSPTO_3676	Psyr_4954	CN228_RS17585		DC3000_4127				0	1	0	0	0.25
PSPPH_0134	PSPTO_3675	Psyr_4953	CN228_RS17580	PSPPH_2193					1	0	0	0	0.25
PSPPH_0135	PSPTO_4181	Psyr_4952	CN228_RS23985	PSPPH_Irp,PSPPH_2193,PSPPH_OmpR	DC3000_4127				3	1	0	0	1
PSPPH_0136	PSPTO_5410	Psyr_4949	CN228_RS01035	PSPPH_4127					1	0	0	0	0.25
PSPPH_0137									0	0	0	0	0
PSPPH_0138	PSPTO_5408	Psyr_4947	CN228_RS01045		DC3000_2193,DC3000_4127				0	2	0	0	0.5
PSPPH_0139	PSPTO_5407	Psyr_4946	CN228_RS01050						0	0	0	0	0
PSPPH_0140	PSPTO_5406	Psyr_4945	CN228_RS01055		DC3000_Irp				0	1	0	0	0.25
PSPPH_0141	PSPTO_5405	Psyr_4944	CN228_RS01060						0	0	0	0	0
PSPPH_0142	PSPTO_5403	Psyr_4942	CN228_RS01065						0	0	0	0	0
PSPPH_0143	PSPTO_5402	Psyr_4941	CN228_RS01070						0	0	0	0	0
PSPPH_0144	PSPTO_5401	Psyr_4940	CN228_RS01075		DC3000_4127				0	1	0	0	0.25
PSPPH_0145	PSPTO_5400	Psyr_4939	CN228_RS01080						0	0	0	0	0
PSPPH_0146	PSPTO_5399	Psyr_4938	CN228_RS01085						0	0	0	0	0
PSPPH_0147	PSPTO_5398	Psyr_4937	CN228_RS01090						0	0	0	0	0
PSPPH_0148	PSPTO_4908	Psyr_1183	CN228_RS03065						0	0	0	0	0
PSPPH_0149	PSPTO_5397	Psyr_4936	CN228_RS01095						0	0	0	0	0
PSPPH_0150	PSPTO_5396	Psyr_4935	CN228_RS01100						0	0	0	0	0
PSPPH_0151									0	0	0	0	0
PSPPH_0152	PSPTO_5394	Psyr_4933	CN228_RS01115	PSPPH_Irp	DC3000_Irp,DC3000_2193,DC3000_4127	B728a_2193			1	3	1	0	1.25
PSPPH_0153	PSPTO_5393	Psyr_4932	CN228_RS01120						0	0	0	0	0
PSPPH_0154	PSPTO_5392	Psyr_4931	CN228_RS01125		DC3000_Irp	B728a_OmpR	CN228_Irp		0	1	1	1	0.75
PSPPH_0155	PSPTO_5391	Psyr_4930	CN228_RS01130		DC3000_2193				0	1	0	0	0.25
PSPPH_0156	PSPTO_5390	Psyr_4929	CN228_RS01140						0	0	0	0	0
PSPPH_0157	PSPTO_2205	Psyr_4928	CN228_RS01145						0	0	0	0	0
PSPPH_0158	PSPTO_5386	Psyr_4926	CN228_RS01165						0	0	0	0	0
PSPPH_0159	PSPTO_5388	Psyr_2725	CN228_RS01155	PSPPH_4127					1	0	0	0	0.25
PSPPH_0160	PSPTO_5387	Psyr_3833	CN228_RS01160						0	0	0	0	0
PSPPH_0161	PSPTO_2917	Psyr_0140	CN228_RS22685						0	0	0	0	0
PSPPH_0162	PSPTO_5576	Psyr_0197	CN228_RS25855						0	0	0	0	0
PSPPH_0163	PSPTO_4068	Psyr_4623	CN228_RS15030						0	0	0	0	0
PSPPH_0164	PSPTO_4345	Psyr_1935	CN228_RS20145	PSPPH_OmpR					1	0	0	0	0.25
PSPPH_0165	PSPTO_3734	Psyr_4016	CN228_RS24610		DC3000_Irp				0	1	0	0	0.25
PSPPH_0166	PSPTO_0707	Psyr_2197	CN228_RS17770	PSPPH_Irp,PSPPH_4127	DC3000_4127				2	1	0	0	0.75
PSPPH_0167	PSPTO_0284	Psyr_3400	CN228_RS09035						0	0	0	0	0
PSPPH_0168									0	0	0	0	0
PSPPH_0169	PSPTO_3208	Psyr_0096	CN228_RS17870						0	0	0	0	0
PSPPH_0170	PSPTO_4735	Psyr_1970	CN228_RS08410						0	0	0	0	0
PSPPH_0171	PSPTO_0883	Psyr_4574	CN228_RS27060						0	0	0	0	0
PSPPH_0172									0	0	0	0	0
PSPPH_0173	PSPTO_0256	Psyr_0150	CN228_RS30425		DC3000_Irp				0	1	0	0	0.25
PSPPH_0174	PSPTO_0208	Psyr_0192	CN228_RS30400		DC3000_2193,DC3000_4127				0	2	0	0	0.5
PSPPH_0175	PSPTO_5582	Psyr_0096	CN228_RS13555						0	0	0	0	0
PSPPH_0176	PSPTO_4735	Psyr_1970	CN228_RS08410						0	0	0	0	0
PSPPH_0177	PSPTO_2617	Psyr_2357	CN228_RS13655						0	0	0	0	0
PSPPH_0178	PSPTO_3347	Psyr_0197	CN228_RS30385						0	0	0	0	0
PSPPH_0179	PSPTO_3353	Psyr_3183	CN228_RS13035	PSPPH_2193					1	0	0	0	0.25
PSPPH_0180	PSPTO_0891	Psyr_4733	CN228_RS30265	PSPPH_Irp					1	0	0	0	0.25
PSPPH_0181	PSPTO_0321	Psyr_2040	CN228_RS02310	PSPPH_Irp,PSPPH_2193					2	0	0	0	0.5
PSPPH_0182	PSPTO_0057	Psyr_4831	CN228_RS29905	PSPPH_Irp,PSPPH_2193	DC3000_Irp,DC3000_2193,DC3000_4127				2	3	0	0	1.25
PSPPH_0183									0	0	0	0	0
PSPPH_0184	PSPTO_0059	Psyr_2412	CN228_RS04140	PSPPH_Irp	DC3000_2193				1	1	0	0	0.5
PSPPH_0185	PSPTO_5554	Psyr_0197	CN228_RS00345		DC3000_Irp				0	1	0	0	0.25
PSPPH_0186	PSPTO_0062	Psyr_0198	CN228_RS30330	PSPPH_2193	DC3000_2193				1	1	0	0	0.5
PSPPH_0187	PSPTO_0063	Psyr_0199	CN228_RS30325						0	0	0	0	0
PSPPH_0188	PSPTO_0064	Psyr_0200	CN228_RS30315	PSPPH_2193,PSPPH_OmpR	DC3000_Irp,DC3000_2193				2	2	0	0	1
PSPPH_0189	PSPTO_0065	Psyr_0201	CN228_RS30310						0	0	0	0	0
PSPPH_0190	PSPTO_0066	Psyr_0202	CN228_RS30305		DC3000_Irp,DC3000_2193				0	2	0	0	0.5
PSPPH_0191	PSPTO_0067	Psyr_0203	CN228_RS30300						0	0	0	0	0
PSPPH_0192	PSPTO_0068	Psyr_0204	CN228_RS30295						0	0	0	0	0
PSPPH_0193	PSPTO_0069	Psyr_0205	CN228_RS30290	PSPPH_2193					1	0	0	0	0.25
PSPPH_0194	PSPTO_0070	Psyr_0206	CN228_RS30275						0	0	0	0	0
PSPPH_0195	PSPTO_0071	Psyr_0207	CN228_RS30270						0	0	0	0	0
PSPPH_0196	PSPTO_0072	Psyr_0208	CN228_RS30265	PSPPH_Irp	DC3000_Irp	B728a_4127			1	1	1	0	0.75
PSPPH_0197	PSPTO_0073	Psyr_0209	CN228_RS30260	PSPPH_OmpR					1	0	0	0	0.25
PSPPH_0198	PSPTO_0074	Psyr_0210	CN228_RS30255		DC3000_Irp,DC3000_2193,DC3000_3122,DC3000_4127	B728a_OmpR			0	4	1	0	1.25
PSPPH_0199	PSPTO_0075	Psyr_0211	CN228_RS30250						0	0	0	0	0
PSPPH_0200	PSPTO_0076	Psyr_0212	CN228_RS30245						0	0	0	0	0
PSPPH_0201	PSPTO_0077	Psyr_0213	CN228_RS30240						0	0	0	0	0
PSPPH_0202	PSPTO_0078	Psyr_0214	CN228_RS30235		DC3000_Irp				0	1	0	0	0.25
PSPPH_0203	PSPTO_0079	Psyr_0215	CN228_RS30230		DC3000_Irp,DC3000_2193				0	2	0	0	0.5
PSPPH_0204	PSPTO_0080	Psyr_0216	CN228_RS30225	PSPPH_OmpR					1	0	0	0	0.25
PSPPH_0205	PSPTO_0081	Psyr_0217	CN228_RS30220						0	0	0	0	0
PSPPH_0206	PSPTO_0082	Psyr_0218	CN228_RS30215						0	0	0	0	0
PSPPH_0207	PSPTO_0083	Psyr_0219	CN228_RS30210	PSPPH_2193					1	0	0	0	0.25
PSPPH_0208	PSPTO_0084	Psyr_0220	CN228_RS30205						0	0	0	0	0
PSPPH_0209	PSPTO_0085	Psyr_0221	CN228_RS30200						0	0	0	0	0
PSPPH_0210	PSPTO_0086	Psyr_0222	CN228_RS30195						0	0	0	0	0
PSPPH_0211	PSPTO_0087	Psyr_0223	CN228_RS30190						0	0	0	0	0
PSPPH_0212	PSPTO_0089	Psyr_0224	CN228_RS30180						0	0	0	0	0
PSPPH_0213	PSPTO_0090	Psyr_0225	CN228_RS30175			B728a_4127	CN228_OmpR		0	0	1	1	0.5
PSPPH_0214	PSPTO_0091	Psyr_0226	CN228_RS30170		DC3000_Irp,DC3000_2193				0	2	0	0	0.5
PSPPH_0215	PSPTO_0092	Psyr_0227	CN228_RS30165	PSPPH_OmpR					1	0	0	0	0.25
PSPPH_0216	PSPTO_0094	Psyr_0228	CN228_RS21880						0	0	0	0	0
PSPPH_0217	PSPTO_0095	Psyr_0229	CN228_RS30150						0	0	0	0	0
PSPPH_0218	PSPTO_0096	Psyr_0230	CN228_RS30145	PSPPH_4127	DC3000_Irp,DC3000_2193	B728a_4127			1	2	1	0	1
PSPPH_0219	PSPTO_0097	Psyr_0231	CN228_RS30140						0	0	0	0	0
PSPPH_0220	PSPTO_0098	Psyr_0232	CN228_RS30135						0	0	0	0	0
PSPPH_0221	PSPTO_0099	Psyr_0233	CN228_RS30130						0	0	0	0	0
PSPPH_0222	PSPTO_0100	Psyr_0234	CN228_RS30125		DC3000_2193,DC3000_4127	B728a_2193,B728a_3122,B728a_4127,B728a_OmpR			0	2	4	0	1.5
PSPPH_0223	PSPTO_0101	Psyr_0235	CN228_RS30120				CN228_Irp		0	0	0	1	0.25
PSPPH_0224	PSPTO_0102	Psyr_0236	CN228_RS30115		DC3000_2193	B728a_Irp			0	1	1	0	0.5
PSPPH_0225	PSPTO_0103	Psyr_0237	CN228_RS30110		DC3000_4127				0	1	0	0	0.25
PSPPH_0226	PSPTO_0105	Psyr_0238	CN228_RS30100	PSPPH_2193	DC3000_2193				1	1	0	0	0.5
PSPPH_0227	PSPTO_0106	Psyr_0239	CN228_RS30095						0	0	0	0	0
PSPPH_0228	PSPTO_3694	Psyr_0767	CN228_RS20885						0	0	0	0	0
PSPPH_0229	PSPTO_0107	Psyr_0241	CN228_RS30090						0	0	0	0	0
PSPPH_0230	PSPTO_0312	Psyr_0242	CN228_RS30550	PSPPH_Irp,PSPPH_2193,PSPPH_4127,PSPPH_OmpR	DC3000_4127	B728a_4127			4	1	1	0	1.5
PSPPH_0231	PSPTO_0313	Psyr_0243	CN228_RS30545	PSPPH_OmpR					1	0	0	0	0.25
PSPPH_0232	PSPTO_0314	Psyr_0244	CN228_RS30540		DC3000_OmpR	B728a_OmpR			0	1	1	0	0.5
PSPPH_0233	PSPTO_0315	Psyr_0245	CN228_RS30535						0	0	0	0	0
PSPPH_0234	PSPTO_0316	Psyr_0246	CN228_RS30530		DC3000_4127	B728a_OmpR			0	1	1	0	0.5
PSPPH_0235	PSPTO_0317	Psyr_0247	CN228_RS30525						0	0	0	0	0
PSPPH_0236	PSPTO_0318	Psyr_0248	CN228_RS01765	PSPPH_2193,PSPPH_4127	DC3000_4127		CN228_4127		2	1	0	1	1
PSPPH_0237	PSPTO_0319	Psyr_0249	CN228_RS01770						0	0	0	0	0
PSPPH_0238	PSPTO_0320	Psyr_0250	CN228_RS01775						0	0	0	0	0
PSPPH_0239	PSPTO_0321	Psyr_0251	CN228_RS16705						0	0	0	0	0
PSPPH_0240	PSPTO_0322	Psyr_0252	CN228_RS01805						0	0	0	0	0
PSPPH_0241	PSPTO_0323	Psyr_0253	CN228_RS01810						0	0	0	0	0
PSPPH_0242	PSPTO_0324	Psyr_0254	CN228_RS01815						0	0	0	0	0
PSPPH_0243	PSPTO_0325	Psyr_0255	CN228_RS01820	PSPPH_2193,PSPPH_OmpR	DC3000_2193,DC3000_4127				2	2	0	0	1
PSPPH_0244	PSPTO_0326	Psyr_0256	CN228_RS01825		DC3000_Irp				0	1	0	0	0.25
PSPPH_0245	PSPTO_0327	Psyr_0257	CN228_RS01830	PSPPH_Irp	DC3000_Irp,DC3000_2193	B728a_Irp	CN228_Irp		1	2	1	1	1.25
PSPPH_0246	PSPTO_0328	Psyr_0258	CN228_RS01835		DC3000_4127				0	1	0	0	0.25
PSPPH_0247	PSPTO_0329	Psyr_0259	CN228_RS01840	PSPPH_Irp	DC3000_Irp				1	1	0	0	0.5
PSPPH_0248	PSPTO_0330	Psyr_0260	CN228_RS01845		DC3000_4127				0	1	0	0	0.25
PSPPH_0249	PSPTO_4554	Psyr_4824	CN228_RS01850	PSPPH_2193					1	0	0	0	0.25
PSPPH_0250	PSPTO_0332	Psyr_0261	CN228_RS01855		DC3000_2193				0	1	0	0	0.25
PSPPH_0251	PSPTO_0333	Psyr_0262	CN228_RS01860	PSPPH_Irp,PSPPH_2193,PSPPH_4127	DC3000_Irp,DC3000_2193,DC3000_4127	B728a_Irp	CN228_Irp		3	3	1	1	2
PSPPH_0252	PSPTO_0334	Psyr_0263	CN228_RS01865						0	0	0	0	0
PSPPH_0253	PSPTO_0335	Psyr_0264	CN228_RS01870						0	0	0	0	0
PSPPH_0254	PSPTO_0338	Psyr_0265	CN228_RS01885	PSPPH_4127		B728a_OmpR			1	0	1	0	0.5
PSPPH_0255	PSPTO_0339	Psyr_0266	CN228_RS01890						0	0	0	0	0
PSPPH_0256	PSPTO_0340	Psyr_0267	CN228_RS01895						0	0	0	0	0
PSPPH_0257	PSPTO_0341	Psyr_0268	CN228_RS01900	PSPPH_OmpR		B728a_OmpR			1	0	1	0	0.5
PSPPH_0258	PSPTO_0343	Psyr_0269	CN228_RS01910	PSPPH_OmpR					1	0	0	0	0.25
PSPPH_0259	PSPTO_0344	Psyr_0270	CN228_RS01915	PSPPH_Irp	DC3000_Irp,DC3000_4127	B728a_Irp	CN228_Irp		1	2	1	1	1.25
PSPPH_0260	PSPTO_0345	Psyr_0271	CN228_RS01920			B728a_4127			0	0	1	0	0.25
PSPPH_0261	PSPTO_0346	Psyr_0272	CN228_RS01925						0	0	0	0	0
PSPPH_0262	PSPTO_5268	Psyr_0275	CN228_RS29875						0	0	0	0	0
PSPPH_0263	PSPTO_5267	Psyr_0276	CN228_RS29870						0	0	0	0	0
PSPPH_0264	PSPTO_5266	Psyr_0277	CN228_RS29865						0	0	0	0	0
PSPPH_0265	PSPTO_5265	Psyr_0278	CN228_RS29860						0	0	0	0	0
PSPPH_0266	PSPTO_5264	Psyr_0279	CN228_RS29855						0	0	0	0	0
PSPPH_0267	PSPTO_5263	Psyr_0280	CN228_RS29845		DC3000_4127				0	1	0	0	0.25
PSPPH_0268	PSPTO_5262	Psyr_0281	CN228_RS29840						0	0	0	0	0
PSPPH_0269	PSPTO_5261	Psyr_0282	CN228_RS29835						0	0	0	0	0
PSPPH_0270	PSPTO_5260	Psyr_0283	CN228_RS29830	PSPPH_2193					1	0	0	0	0.25
PSPPH_0271	PSPTO_5259	Psyr_0284	CN228_RS29825	PSPPH_Irp					1	0	0	0	0.25
PSPPH_0272	PSPTO_5258	Psyr_0285	CN228_RS29820	PSPPH_2193		B728a_OmpR			1	0	1	0	0.5
PSPPH_0273	PSPTO_5257	Psyr_0286	CN228_RS29815		DC3000_Irp,DC3000_2193,DC3000_4127				0	3	0	0	0.75
PSPPH_0274	PSPTO_5256	Psyr_0287	CN228_RS29810						0	0	0	0	0
PSPPH_0275	PSPTO_5255	Psyr_0288	CN228_RS29805	PSPPH_Irp,PSPPH_2193		B728a_OmpR			2	0	1	0	0.75
PSPPH_0276	PSPTO_5254	Psyr_0289	CN228_RS29800						0	0	0	0	0
PSPPH_0277	PSPTO_5253	Psyr_0290	CN228_RS29795		DC3000_2193				0	1	0	0	0.25
PSPPH_0278	PSPTO_5252	Psyr_0291	CN228_RS29790	PSPPH_2193		B728a_OmpR			1	0	1	0	0.5
PSPPH_0279	PSPTO_5251	Psyr_0292	CN228_RS29785						0	0	0	0	0
PSPPH_0280	PSPTO_5250	Psyr_0293	CN228_RS29780	PSPPH_2193	DC3000_4127				1	1	0	0	0.5
PSPPH_0281	PSPTO_5249	Psyr_0294	CN228_RS29775	PSPPH_Irp,PSPPH_2193	DC3000_2193				2	1	0	0	0.75
PSPPH_0282	PSPTO_5248	Psyr_0295	CN228_RS29765						0	0	0	0	0
PSPPH_0283	PSPTO_5247	Psyr_0296	CN228_RS29760						0	0	0	0	0
PSPPH_0284	PSPTO_5246	Psyr_0297	CN228_RS29755						0	0	0	0	0
PSPPH_0285	PSPTO_5245	Psyr_0298	CN228_RS29750	PSPPH_Irp					1	0	0	0	0.25
PSPPH_0286	PSPTO_5244	Psyr_0299	CN228_RS29745		DC3000_Irp				0	1	0	0	0.25
PSPPH_0287	PSPTO_5243	Psyr_0300	CN228_RS29740	PSPPH_2193	DC3000_2193,DC3000_4127				1	2	0	0	0.75
PSPPH_0288	PSPTO_5242	Psyr_0301	CN228_RS29735	PSPPH_OmpR	DC3000_Irp,DC3000_2193,DC3000_4127				1	3	0	0	1
PSPPH_0289	PSPTO_5241	Psyr_0302	CN228_RS29730						0	0	0	0	0
PSPPH_0290	PSPTO_5240	Psyr_0303	CN228_RS29725	PSPPH_2193	DC3000_2193				1	1	0	0	0.5
PSPPH_0291	PSPTO_5239	Psyr_0304	CN228_RS29720	PSPPH_2193	DC3000_2193				1	1	0	0	0.5
PSPPH_0292	PSPTO_5238	Psyr_0305	CN228_RS29715	PSPPH_Irp					1	0	0	0	0.25
PSPPH_0293	PSPTO_5237	Psyr_0306	CN228_RS29710		DC3000_Irp				0	1	0	0	0.25
PSPPH_0294	PSPTO_5235	Psyr_1758	CN228_RS29705						0	0	0	0	0
PSPPH_0295	PSPTO_1165	Psyr_0308	CN228_RS29690	PSPPH_OmpR					1	0	0	0	0.25
PSPPH_0296	PSPTO_5233	Psyr_0309	CN228_RS29685						0	0	0	0	0
PSPPH_0297									0	0	0	0	0
PSPPH_0298	PSPTO_5231	Psyr_0313	CN228_RS29670						0	0	0	0	0
PSPPH_0299	PSPTO_5230	Psyr_0314	CN228_RS29665						0	0	0	0	0
PSPPH_0300	PSPTO_5229	Psyr_0315	CN228_RS29660						0	0	0	0	0
PSPPH_0301	PSPTO_5228	Psyr_0316	CN228_RS29655						0	0	0	0	0
PSPPH_0302	PSPTO_5227	Psyr_0317	CN228_RS29650	PSPPH_4127					1	0	0	0	0.25
PSPPH_0303	PSPTO_5226	Psyr_0318	CN228_RS29640						0	0	0	0	0
PSPPH_0304	PSPTO_5225	Psyr_0319	CN228_RS29635						0	0	0	0	0
PSPPH_0305	PSPTO_5224	Psyr_0320	CN228_RS29630						0	0	0	0	0
PSPPH_0306	PSPTO_5223	Psyr_0321	CN228_RS29625						0	0	0	0	0
PSPPH_0307	PSPTO_5222	Psyr_0322	CN228_RS29620						0	0	0	0	0
PSPPH_0308	PSPTO_5221	Psyr_0323	CN228_RS29615						0	0	0	0	0
PSPPH_0309									0	0	0	0	0
PSPPH_0310	PSPTO_5219	Psyr_0325	CN228_RS29595	PSPPH_Irp	DC3000_Irp,DC3000_2193,DC3000_4127		CN228_Irp		1	3	0	1	1.25
PSPPH_0311	PSPTO_5218	Psyr_0326	CN228_RS29590	PSPPH_2193	DC3000_2193				1	1	0	0	0.5
PSPPH_0312	PSPTO_5217	Psyr_0327	CN228_RS29585						0	0	0	0	0
PSPPH_0313	PSPTO_5216	Psyr_0328	CN228_RS29580	PSPPH_Irp,PSPPH_2193	DC3000_2193				2	1	0	0	0.75
PSPPH_0314	PSPTO_0869	Psyr_0329	CN228_RS29570		DC3000_Irp				0	1	0	0	0.25
PSPPH_0315	PSPTO_1339	Psyr_0335	CN228_RS29535						0	0	0	0	0
PSPPH_0316	PSPTO_1167	Psyr_0687	CN228_RS29530	PSPPH_Irp	DC3000_Irp,DC3000_4127				1	2	0	0	0.75
PSPPH_0317	PSPTO_1167	Psyr_0687	CN228_RS29515	PSPPH_4127					1	0	0	0	0.25
PSPPH_0318	PSPTO_5201	Psyr_3731	CN228_RS29500		DC3000_4127	B728a_2193			0	1	1	0	0.5
PSPPH_0319	PSPTO_5200	Psyr_0336	CN228_RS29495	PSPPH_2193		B728a_OmpR			1	0	1	0	0.5
PSPPH_0320	PSPTO_5198	Psyr_0337	CN228_RS29485	PSPPH_OmpR	DC3000_Irp,DC3000_2193,DC3000_OmpR				1	3	0	0	1
PSPPH_0321	PSPTO_5197	Psyr_0338	CN228_RS29480						0	0	0	0	0
PSPPH_0322	PSPTO_5196	Psyr_0339	CN228_RS29475						0	0	0	0	0
PSPPH_0323	PSPTO_5195	Psyr_0340	CN228_RS29460						0	0	0	0	0
PSPPH_0324	PSPTO_5557	Psyr_0341	CN228_RS24740	PSPPH_Irp,PSPPH_4127	DC3000_Irp,DC3000_2193	B728a_Irp			2	2	1	0	1.25
PSPPH_0325	PSPTO_0454	Psyr_0342	CN228_RS31255						0	0	0	0	0
PSPPH_0326	PSPTO_5194	Psyr_0343	CN228_RS29455		DC3000_Irp				0	1	0	0	0.25
PSPPH_0327	PSPTO_5193	Psyr_0344	CN228_RS29450	PSPPH_2193					1	0	0	0	0.25
PSPPH_0328	PSPTO_5192	Psyr_0345	CN228_RS29445						0	0	0	0	0
PSPPH_0329	PSPTO_5191	Psyr_0346	CN228_RS29440	PSPPH_Irp					1	0	0	0	0.25
PSPPH_0330	PSPTO_1280	Psyr_0347	CN228_RS06465	PSPPH_Irp,PSPPH_2193					2	0	0	0	0.5
PSPPH_0331	PSPTO_5190	Psyr_0348	CN228_RS29430						0	0	0	0	0
PSPPH_0332	PSPTO_5189	Psyr_0349	CN228_RS29425						0	0	0	0	0
PSPPH_0333	PSPTO_5188	Psyr_0350	CN228_RS29420						0	0	0	0	0
PSPPH_0334	PSPTO_5187	Psyr_0351	CN228_RS29415	PSPPH_Irp		B728a_3122,B728a_4127			1	0	2	0	0.75
PSPPH_0335	PSPTO_5186	Psyr_0352	CN228_RS29405	PSPPH_2193		B728a_2193			1	0	1	0	0.5
PSPPH_0336	PSPTO_5185	Psyr_0353	CN228_RS29400						0	0	0	0	0
PSPPH_0337	PSPTO_5184	Psyr_0354	CN228_RS29395	PSPPH_2193	DC3000_Irp,DC3000_2193				1	2	0	0	0.75
PSPPH_0338	PSPTO_5183	Psyr_0355	CN228_RS29390	PSPPH_Irp	DC3000_2193,DC3000_4127				1	2	0	0	0.75
PSPPH_0339	PSPTO_2135	Psyr_3887	CN228_RS22685						0	0	0	0	0
PSPPH_0340	PSPTO_5182	Psyr_0356	CN228_RS29385						0	0	0	0	0
PSPPH_0341	PSPTO_5181	Psyr_0357	CN228_RS29380						0	0	0	0	0
PSPPH_0342	PSPTO_5180	Psyr_0358	CN228_RS29375		DC3000_2193,DC3000_4127				0	2	0	0	0.5
PSPPH_0343	PSPTO_5179	Psyr_0359	CN228_RS29370	PSPPH_2193		B728a_2193			1	0	1	0	0.5
PSPPH_0344	PSPTO_5178	Psyr_0360	CN228_RS29365						0	0	0	0	0
PSPPH_0345	PSPTO_5176	Psyr_0362	CN228_RS29355						0	0	0	0	0
PSPPH_0346	PSPTO_5175	Psyr_0363	CN228_RS29350						0	0	0	0	0
PSPPH_0347	PSPTO_5174	Psyr_0364	CN228_RS29345	PSPPH_Irp	DC3000_4127		CN228_Irp		1	1	0	1	0.75
PSPPH_0348	PSPTO_5173	Psyr_0365	CN228_RS29340						0	0	0	0	0
PSPPH_0349	PSPTO_5172	Psyr_0366	CN228_RS29335	PSPPH_4127					1	0	0	0	0.25
PSPPH_0350	PSPTO_5171	Psyr_0367	CN228_RS29330						0	0	0	0	0
PSPPH_0351	PSPTO_5170	Psyr_0368	CN228_RS29320						0	0	0	0	0
PSPPH_0352	PSPTO_5169	Psyr_0369	CN228_RS29315		DC3000_Irp,DC3000_4127				0	2	0	0	0.5
PSPPH_0353	PSPTO_5168	Psyr_0370	CN228_RS29310						0	0	0	0	0
PSPPH_0354	PSPTO_5167	Psyr_0371	CN228_RS29305		DC3000_2193	B728a_OmpR			0	1	1	0	0.5
PSPPH_0355	PSPTO_5166	Psyr_1003	CN228_RS29300						0	0	0	0	0
PSPPH_0356	PSPTO_5165	Psyr_0374	CN228_RS29290		DC3000_Irp				0	1	0	0	0.25
PSPPH_0357	PSPTO_5164	Psyr_0375	CN228_RS29285		DC3000_2193				0	1	0	0	0.25
PSPPH_0358	PSPTO_5163	Psyr_0376	CN228_RS29280						0	0	0	0	0
PSPPH_0359	PSPTO_5162	Psyr_0377	CN228_RS29275		DC3000_Irp,DC3000_2193,DC3000_4127		CN228_Irp		0	3	0	1	1
PSPPH_0360	PSPTO_5161	Psyr_0378	CN228_RS29270		DC3000_2193				0	1	0	0	0.25
PSPPH_0361	PSPTO_4978	Psyr_3879	CN228_RS11340						0	0	0	0	0
PSPPH_0362	PSPTO_5160	Psyr_0379	CN228_RS29255		DC3000_2193	B728a_OmpR			0	1	1	0	0.5
PSPPH_0363	PSPTO_5159	Psyr_0380	CN228_RS29250						0	0	0	0	0
PSPPH_0364	PSPTO_5158	Psyr_0381	CN228_RS29245	PSPPH_Irp					1	0	0	0	0.25
PSPPH_0365	PSPTO_5157	Psyr_0382	CN228_RS29240						0	0	0	0	0
PSPPH_0366	PSPTO_5156	Psyr_0383	CN228_RS29235	PSPPH_Irp					1	0	0	0	0.25
PSPPH_0367	PSPTO_5155	Psyr_0384	CN228_RS29230		DC3000_Irp		CN228_4127		0	1	0	1	0.5
PSPPH_0368	PSPTO_5154	Psyr_0385	CN228_RS29225						0	0	0	0	0
PSPPH_0369	PSPTO_5153	Psyr_0386	CN228_RS29220	PSPPH_Irp					1	0	0	0	0.25
PSPPH_0370	PSPTO_5152	Psyr_0387	CN228_RS29215						0	0	0	0	0
PSPPH_0371	PSPTO_5151	Psyr_0388	CN228_RS29210						0	0	0	0	0
PSPPH_0372	PSPTO_5150	Psyr_0389	CN228_RS29205						0	0	0	0	0
PSPPH_0373	PSPTO_5149	Psyr_0390	CN228_RS29200						0	0	0	0	0
PSPPH_0374	PSPTO_5148	Psyr_4958	CN228_RS29195						0	0	0	0	0
PSPPH_0375	PSPTO_5147	Psyr_0391	CN228_RS29190						0	0	0	0	0
PSPPH_0376	PSPTO_5146	Psyr_1657	CN228_RS29185						0	0	0	0	0
PSPPH_0377	PSPTO_5145	Psyr_3988	CN228_RS29180		DC3000_Irp				0	1	0	0	0.25
PSPPH_0378	PSPTO_5144	Psyr_3915	CN228_RS29175						0	0	0	0	0
PSPPH_0379	PSPTO_5145	Psyr_3467	CN228_RS29170						0	0	0	0	0
PSPPH_0380	PSPTO_5142	Psyr_0393	CN228_RS29165						0	0	0	0	0
PSPPH_0381	PSPTO_5141	Psyr_0394	CN228_RS29160		DC3000_4127				0	1	0	0	0.25
PSPPH_0382	PSPTO_5140	Psyr_0395	CN228_RS29155	PSPPH_OmpR		B728a_OmpR			1	0	1	0	0.5
PSPPH_0383	PSPTO_5139	Psyr_0396	CN228_RS29150						0	0	0	0	0
PSPPH_0384	PSPTO_5138	Psyr_0397	CN228_RS29145						0	0	0	0	0
PSPPH_0385	PSPTO_5137	Psyr_0398	CN228_RS29140						0	0	0	0	0
PSPPH_0386	PSPTO_5136	Psyr_0399	CN228_RS29135						0	0	0	0	0
PSPPH_0387	PSPTO_5135	Psyr_0400	CN228_RS29130						0	0	0	0	0
PSPPH_0388	PSPTO_5134	Psyr_0401	CN228_RS29125						0	0	0	0	0
PSPPH_0389	PSPTO_5133	Psyr_0402	CN228_RS29120	PSPPH_Irp,PSPPH_2193					2	0	0	0	0.5
PSPPH_0390	PSPTO_5132	Psyr_0403	CN228_RS29115		DC3000_Irp,DC3000_2193		CN228_Irp		0	2	0	1	0.75
PSPPH_0391	PSPTO_5131	Psyr_0404	CN228_RS29110		DC3000_2193				0	1	0	0	0.25
PSPPH_0392	PSPTO_5130	Psyr_0405	CN228_RS29105						0	0	0	0	0
PSPPH_0393	PSPTO_5129	Psyr_0406	CN228_RS29100						0	0	0	0	0
PSPPH_0394	PSPTO_5128	Psyr_0407	CN228_RS29095						0	0	0	0	0
PSPPH_0395	PSPTO_5127	Psyr_0408	CN228_RS29090	PSPPH_Irp	DC3000_Irp,DC3000_2193,DC3000_4127				1	3	0	0	1
PSPPH_0396	PSPTO_5126	Psyr_0409	CN228_RS29085						0	0	0	0	0
PSPPH_0397	PSPTO_5125	Psyr_0410	CN228_RS29080		DC3000_Irp				0	1	0	0	0.25
PSPPH_0398	PSPTO_5123	Psyr_0411	CN228_RS29065						0	0	0	0	0
PSPPH_0399	PSPTO_5185	Psyr_4465	CN228_RS04850						0	0	0	0	0
PSPPH_0400	PSPTO_5121	Psyr_0412	CN228_RS29060						0	0	0	0	0
PSPPH_0401	PSPTO_5120	Psyr_2208	CN228_RS29055		DC3000_4127				0	1	0	0	0.25
PSPPH_0402	PSPTO_5119	Psyr_0413	CN228_RS29050	PSPPH_Irp		B728a_OmpR			1	0	1	0	0.5
PSPPH_0403	PSPTO_5119	Psyr_0413	CN228_RS29045	PSPPH_2193					1	0	0	0	0.25
PSPPH_0404	PSPTO_5118	Psyr_0414	CN228_RS29040		DC3000_Irp,DC3000_2193				0	2	0	0	0.5
PSPPH_0405	PSPTO_5117	Psyr_0415	CN228_RS29030		DC3000_2193				0	1	0	0	0.25
PSPPH_0406	PSPTO_5116	Psyr_0416	CN228_RS29025		DC3000_Irp				0	1	0	0	0.25
PSPPH_0407	PSPTO_5115	Psyr_0417	CN228_RS19225						0	0	0	0	0
PSPPH_0408	PSPTO_5114	Psyr_0418	CN228_RS29015	PSPPH_2193					1	0	0	0	0.25
PSPPH_0409	PSPTO_5113	Psyr_0419	CN228_RS29010						0	0	0	0	0
PSPPH_0410	PSPTO_5112	Psyr_0420	CN228_RS29005						0	0	0	0	0
PSPPH_0411	PSPTO_5111	Psyr_0421	CN228_RS29000		DC3000_2193,DC3000_4127				0	2	0	0	0.5
PSPPH_0412	PSPTO_5110	Psyr_0422	CN228_RS28995	PSPPH_4127					1	0	0	0	0.25
PSPPH_0413	PSPTO_5109	Psyr_0423	CN228_RS28990						0	0	0	0	0
PSPPH_0414	PSPTO_5108	Psyr_0424	CN228_RS28985						0	0	0	0	0
PSPPH_0415	PSPTO_5107	Psyr_0425	CN228_RS28980						0	0	0	0	0
PSPPH_0416	PSPTO_5106	Psyr_0426	CN228_RS28975		DC3000_4127				0	1	0	0	0.25
PSPPH_0417	PSPTO_5105	Psyr_0427	CN228_RS28970						0	0	0	0	0
PSPPH_0418	PSPTO_5104	Psyr_0428	CN228_RS28965						0	0	0	0	0
PSPPH_0419	PSPTO_5102	Psyr_0429	CN228_RS28955						0	0	0	0	0
PSPPH_0420	PSPTO_5101	Psyr_0430	CN228_RS28950						0	0	0	0	0
PSPPH_0421	PSPTO_5100	Psyr_0431	CN228_RS28945						0	0	0	0	0
PSPPH_0422	PSPTO_5099	Psyr_0221	CN228_RS30200		DC3000_2193				0	1	0	0	0.25
PSPPH_0423	PSPTO_5098	Psyr_0432	CN228_RS28935						0	0	0	0	0
PSPPH_0424	PSPTO_5097	Psyr_0433	CN228_RS28930						0	0	0	0	0
PSPPH_0425	PSPTO_5096	Psyr_0434	CN228_RS07850						0	0	0	0	0
PSPPH_0426	PSPTO_5095	Psyr_0435	CN228_RS28920						0	0	0	0	0
PSPPH_0427	PSPTO_5094	Psyr_0436	CN228_RS28915						0	0	0	0	0
PSPPH_0428	PSPTO_5093	Psyr_0437	CN228_RS28910						0	0	0	0	0
PSPPH_0429	PSPTO_5092	Psyr_0438	CN228_RS28905						0	0	0	0	0
PSPPH_0430	PSPTO_5091	Psyr_0439	CN228_RS28900	PSPPH_2193,PSPPH_OmpR		B728a_OmpR			2	0	1	0	0.75
PSPPH_0431	PSPTO_5090	Psyr_0440	CN228_RS28895	PSPPH_OmpR	DC3000_Irp,DC3000_2193,DC3000_4127		CN228_Irp		1	3	0	1	1.25
PSPPH_0432	PSPTO_5089	Psyr_0441	CN228_RS28890						0	0	0	0	0
PSPPH_0433	PSPTO_5087	Psyr_0442	CN228_RS28880		DC3000_Irp				0	1	0	0	0.25
PSPPH_0434	PSPTO_5086	Psyr_0443	CN228_RS28875	PSPPH_4127					1	0	0	0	0.25
PSPPH_0435	PSPTO_5085	Psyr_0444	CN228_RS28870						0	0	0	0	0
PSPPH_0436	PSPTO_5084	Psyr_0445	CN228_RS28865						0	0	0	0	0
PSPPH_0437	PSPTO_5083	Psyr_0446	CN228_RS28860	PSPPH_4127					1	0	0	0	0.25
PSPPH_0438	PSPTO_5082	Psyr_0447	CN228_RS28855						0	0	0	0	0
PSPPH_0439	PSPTO_5081	Psyr_0448	CN228_RS28850						0	0	0	0	0
PSPPH_0440	PSPTO_5080	Psyr_0449	CN228_RS28845						0	0	0	0	0
PSPPH_0441	PSPTO_5079	Psyr_0450	CN228_RS28840						0	0	0	0	0
PSPPH_0442	PSPTO_5078	Psyr_0451	CN228_RS28835			B728a_4127,B728a_OmpR			0	0	2	0	0.5
PSPPH_0443	PSPTO_5077	Psyr_0452	CN228_RS28830		DC3000_OmpR				0	1	0	0	0.25
PSPPH_0444	PSPTO_5076	Psyr_0453	CN228_RS28820						0	0	0	0	0
PSPPH_0445	PSPTO_5075	Psyr_0454	CN228_RS28815						0	0	0	0	0
PSPPH_0446	PSPTO_5074	Psyr_0455	CN228_RS28810						0	0	0	0	0
PSPPH_0447	PSPTO_5072	Psyr_0456	CN228_RS28800	PSPPH_2193,PSPPH_3122	DC3000_2193	B728a_OmpR			2	1	1	0	1
PSPPH_0448	PSPTO_5071	Psyr_0457	CN228_RS28795		DC3000_Irp				0	1	0	0	0.25
PSPPH_0449	PSPTO_5070	Psyr_0458	CN228_RS28765		DC3000_2193,DC3000_4127				0	2	0	0	0.5
PSPPH_0450	PSPTO_5069	Psyr_0459	CN228_RS28760						0	0	0	0	0
PSPPH_0451	PSPTO_5068	Psyr_0460	CN228_RS28750	PSPPH_Irp		B728a_Irp,B728a_4127,B728a_OmpR			1	0	3	0	1
PSPPH_0452	PSPTO_5067	Psyr_0461	CN228_RS28745						0	0	0	0	0
PSPPH_0453	PSPTO_5064	Psyr_0462	CN228_RS28735						0	0	0	0	0
PSPPH_0454	PSPTO_5063	Psyr_0463	CN228_RS28730						0	0	0	0	0
PSPPH_0455	PSPTO_5062	Psyr_0464	CN228_RS28725						0	0	0	0	0
PSPPH_0456	PSPTO_5061	Psyr_0465	CN228_RS28720						0	0	0	0	0
PSPPH_0457	PSPTO_5060	Psyr_0466	CN228_RS28715		DC3000_2193				0	1	0	0	0.25
PSPPH_0458	PSPTO_1320	Psyr_0467	CN228_RS28710						0	0	0	0	0
PSPPH_0459	PSPTO_5058	Psyr_0468	CN228_RS28705						0	0	0	0	0
PSPPH_0460	PSPTO_5057	Psyr_0469	CN228_RS28700						0	0	0	0	0
PSPPH_0461	PSPTO_5053	Psyr_0470	CN228_RS28675		DC3000_2193				0	1	0	0	0.25
PSPPH_0462	PSPTO_5052	Psyr_0471	CN228_RS28670						0	0	0	0	0
PSPPH_0463	PSPTO_5051	Psyr_0472	CN228_RS28665						0	0	0	0	0
PSPPH_0464	PSPTO_5050	Psyr_0473	CN228_RS28660	PSPPH_2193	DC3000_2193				1	1	0	0	0.5
PSPPH_0465	PSPTO_5049	Psyr_0474	CN228_RS28655						0	0	0	0	0
PSPPH_0466	PSPTO_5048	Psyr_0475	CN228_RS28645						0	0	0	0	0
PSPPH_0467	PSPTO_5047	Psyr_0476	CN228_RS28640						0	0	0	0	0
PSPPH_0468	PSPTO_5046	Psyr_0477	CN228_RS28635						0	0	0	0	0
PSPPH_0469	PSPTO_5045	Psyr_0478	CN228_RS28630						0	0	0	0	0
PSPPH_0470	PSPTO_5044	Psyr_0479	CN228_RS28625						0	0	0	0	0
PSPPH_0471	PSPTO_5043	Psyr_0480	CN228_RS28620		DC3000_2193				0	1	0	0	0.25
PSPPH_0472	PSPTO_5041	Psyr_0481	CN228_RS28615						0	0	0	0	0
PSPPH_0473	PSPTO_5040	Psyr_0482	CN228_RS28610						0	0	0	0	0
PSPPH_0474	PSPTO_5039	Psyr_0483	CN228_RS28605	PSPPH_Irp	DC3000_Irp				1	1	0	0	0.5
PSPPH_0475	PSPTO_5038	Psyr_0484	CN228_RS28600						0	0	0	0	0
PSPPH_0476	PSPTO_5037	Psyr_0485	CN228_RS28595	PSPPH_OmpR					1	0	0	0	0.25
PSPPH_0477	PSPTO_5036	Psyr_0486	CN228_RS28590						0	0	0	0	0
PSPPH_0478	PSPTO_5035	Psyr_0487	CN228_RS28585						0	0	0	0	0
PSPPH_0479	PSPTO_5034	Psyr_0488	CN228_RS28580						0	0	0	0	0
PSPPH_0480	PSPTO_5033	Psyr_0489	CN228_RS28575		DC3000_2193				0	1	0	0	0.25
PSPPH_0481	PSPTO_5032	Psyr_0490	CN228_RS28570						0	0	0	0	0
PSPPH_0482	PSPTO_5031	Psyr_0491	CN228_RS28565		DC3000_4127				0	1	0	0	0.25
PSPPH_0483	PSPTO_5030	Psyr_0492	CN228_RS28560						0	0	0	0	0
PSPPH_0484	PSPTO_5029	Psyr_0493	CN228_RS28555		DC3000_Irp				0	1	0	0	0.25
PSPPH_0485	PSPTO_5028	Psyr_0494	CN228_RS28540						0	0	0	0	0
PSPPH_0486	PSPTO_5027	Psyr_0495	CN228_RS28535			B728a_Irp			0	0	1	0	0.25
PSPPH_0487	PSPTO_5377	Psyr_0496	CN228_RS01225						0	0	0	0	0
PSPPH_0488	PSPTO_5378	Psyr_0497	CN228_RS01220						0	0	0	0	0
PSPPH_0489									0	0	0	0	0
PSPPH_0490	PSPTO_5380	Psyr_0499	CN228_RS01210	PSPPH_4127					1	0	0	0	0.25
PSPPH_0491	PSPTO_5381	Psyr_0500	CN228_RS01205		DC3000_2193				0	1	0	0	0.25
PSPPH_0492	PSPTO_5024	Psyr_0501	CN228_RS28450				CN228_Irp		0	0	0	1	0.25
PSPPH_0493	PSPTO_5023	Psyr_0502	CN228_RS28445		DC3000_Irp				0	1	0	0	0.25
PSPPH_0494	PSPTO_5021	Psyr_0504	CN228_RS28310	PSPPH_Irp	DC3000_Irp,DC3000_2193,DC3000_4127	B728a_4127			1	3	1	0	1.25
PSPPH_0495	PSPTO_5020	Psyr_0505	CN228_RS28430	PSPPH_4127					1	0	0	0	0.25
PSPPH_0496	PSPTO_5017	Psyr_0506	CN228_RS28425	PSPPH_Irp,PSPPH_2193,PSPPH_OmpR	DC3000_Irp	B728a_Irp			3	1	1	0	1.25
PSPPH_0497	PSPTO_5016	Psyr_0507	CN228_RS28420		DC3000_2193	B728a_OmpR	CN228_Irp		0	1	1	1	0.75
PSPPH_0498	PSPTO_5015	Psyr_0508	CN228_RS28415		DC3000_2193				0	1	0	0	0.25
PSPPH_0499	PSPTO_5014	Psyr_0509	CN228_RS28410		DC3000_Irp,DC3000_4127		CN228_Irp		0	2	0	1	0.75
PSPPH_0500	PSPTO_5013	Psyr_0510	CN228_RS28405		DC3000_2193		CN228_Irp		0	1	0	1	0.5
PSPPH_0501	PSPTO_5012	Psyr_0511	CN228_RS28400						0	0	0	0	0
PSPPH_0502	PSPTO_5011	Psyr_0512	CN228_RS28395						0	0	0	0	0
PSPPH_0503	PSPTO_5010	Psyr_0513	CN228_RS28390						0	0	0	0	0
PSPPH_0504	PSPTO_5009	Psyr_0514	CN228_RS28385	PSPPH_Irp,PSPPH_2193					2	0	0	0	0.5
PSPPH_0505	PSPTO_5008	Psyr_0515	CN228_RS28380						0	0	0	0	0
PSPPH_0506	PSPTO_5007	Psyr_0516	CN228_RS28370	PSPPH_4127					1	0	0	0	0.25
PSPPH_0507	PSPTO_5006	Psyr_0517	CN228_RS28360		DC3000_4127				0	1	0	0	0.25
PSPPH_0508	PSPTO_5005	Psyr_0518	CN228_RS28355	PSPPH_Irp		B728a_Irp			1	0	1	0	0.5
PSPPH_0509	PSPTO_5004	Psyr_0519	CN228_RS28350		DC3000_Irp,DC3000_2193		CN228_Irp		0	2	0	1	0.75
PSPPH_0510	PSPTO_5003	Psyr_0520	CN228_RS28345	PSPPH_Irp,PSPPH_4127	DC3000_Irp,DC3000_2193,DC3000_4127	B728a_4127	CN228_Irp		2	3	1	1	1.75
PSPPH_0511	PSPTO_5002	Psyr_0521	CN228_RS28340						0	0	0	0	0
PSPPH_0512	PSPTO_5001	Psyr_0522	CN228_RS28335						0	0	0	0	0
PSPPH_0513	PSPTO_5000	Psyr_0523	CN228_RS28330	PSPPH_OmpR					1	0	0	0	0.25
PSPPH_0514	PSPTO_4999	Psyr_0524	CN228_RS28325						0	0	0	0	0
PSPPH_0515	PSPTO_4998	Psyr_0525	CN228_RS28320						0	0	0	0	0
PSPPH_0516	PSPTO_4997	Psyr_0526	CN228_RS28315						0	0	0	0	0
PSPPH_0517	PSPTO_4993	Psyr_0527	CN228_RS28310						0	0	0	0	0
PSPPH_0518	PSPTO_4993	Psyr_0527	CN228_RS28310						0	0	0	0	0
PSPPH_0519	PSPTO_4992	Psyr_0528	CN228_RS28305	PSPPH_OmpR	DC3000_2193		CN228_Irp		1	1	0	1	0.75
PSPPH_0520	PSPTO_4991	Psyr_0529	CN228_RS28300				CN228_Irp		0	0	0	1	0.25
PSPPH_0521	PSPTO_4990	Psyr_0530	CN228_RS28295						0	0	0	0	0
PSPPH_0522	PSPTO_4989	Psyr_0531	CN228_RS28290						0	0	0	0	0
PSPPH_0523	PSPTO_4988	Psyr_0532	CN228_RS28285	PSPPH_Irp,PSPPH_4127					2	0	0	0	0.5
PSPPH_0524	PSPTO_4987	Psyr_0533	CN228_RS28280	PSPPH_Irp,PSPPH_2193	DC3000_Irp,DC3000_2193	B728a_3122,B728a_4127	CN228_Irp		2	2	2	1	1.75
PSPPH_0525	PSPTO_4986	Psyr_0534	CN228_RS28275		DC3000_Irp,DC3000_2193,DC3000_4127				0	3	0	0	0.75
PSPPH_0526	PSPTO_4985	Psyr_0535	CN228_RS28270				CN228_Irp		0	0	0	1	0.25
PSPPH_0527	PSPTO_4984	Psyr_0536	CN228_RS28260			B728a_OmpR			0	0	1	0	0.25
PSPPH_0528	PSPTO_4983	Psyr_0537	CN228_RS28255						0	0	0	0	0
PSPPH_0529	PSPTO_4982	Psyr_0538	CN228_RS28250		DC3000_4127				0	1	0	0	0.25
PSPPH_0530	PSPTO_4981	Psyr_0539	CN228_RS28245						0	0	0	0	0
PSPPH_0531	PSPTO_4980	Psyr_0540	CN228_RS28240						0	0	0	0	0
PSPPH_0532	PSPTO_4979	Psyr_0541	CN228_RS28235						0	0	0	0	0
PSPPH_0533	PSPTO_4978	Psyr_0542	CN228_RS28230						0	0	0	0	0
PSPPH_0534	PSPTO_4977	Psyr_0543	CN228_RS28225				CN228_Irp		0	0	0	1	0.25
PSPPH_0535	PSPTO_4976	Psyr_0544	CN228_RS28220						0	0	0	0	0
PSPPH_0536	PSPTO_4975	Psyr_0545	CN228_RS28215						0	0	0	0	0
PSPPH_0537	PSPTO_4975	Psyr_0545	CN228_RS28215						0	0	0	0	0
PSPPH_0538	PSPTO_4974	Psyr_0546	CN228_RS28210						0	0	0	0	0
PSPPH_0539	PSPTO_4973	Psyr_0547	CN228_RS28200		DC3000_2193		CN228_Irp		0	1	0	1	0.5
PSPPH_0540	PSPTO_4972	Psyr_0548	CN228_RS28195		DC3000_2193				0	1	0	0	0.25
PSPPH_0541	PSPTO_4966	Psyr_2060	CN228_RS28190		DC3000_Irp,DC3000_2193,DC3000_4127				0	3	0	0	0.75
PSPPH_0542	PSPTO_4965	Psyr_0549	CN228_RS28185	PSPPH_Irp					1	0	0	0	0.25
PSPPH_0543	PSPTO_4964	Psyr_0550	CN228_RS23630						0	0	0	0	0
PSPPH_0544	PSPTO_4963	Psyr_0551	CN228_RS28175						0	0	0	0	0
PSPPH_0545	PSPTO_4962	Psyr_0552	CN228_RS28170		DC3000_3122				0	1	0	0	0.25
PSPPH_0546	PSPTO_4961	Psyr_0553	CN228_RS28165						0	0	0	0	0
PSPPH_0547	PSPTO_4960	Psyr_0554	CN228_RS28160						0	0	0	0	0
PSPPH_0548	PSPTO_4959	Psyr_0555	CN228_RS28155	PSPPH_Irp	DC3000_Irp,DC3000_2193,DC3000_4127	B728a_Irp,B728a_2193	CN228_Irp		1	3	2	1	1.75
PSPPH_0549	PSPTO_4958	Psyr_0556	CN228_RS28140	PSPPH_Irp		B728a_Irp			1	0	1	0	0.5
PSPPH_0550	PSPTO_4957	Psyr_0557	CN228_RS28135		DC3000_Irp,DC3000_2193,DC3000_4127		CN228_Irp		0	3	0	1	1
PSPPH_0551	PSPTO_4956	Psyr_0558	CN228_RS28130	PSPPH_4127	DC3000_Irp,DC3000_2193				1	2	0	0	0.75
PSPPH_0552	PSPTO_4955	Psyr_0559	CN228_RS28125						0	0	0	0	0
PSPPH_0553	PSPTO_4954	Psyr_0560	CN228_RS28120	PSPPH_Irp,PSPPH_OmpR					2	0	0	0	0.5
PSPPH_0554	PSPTO_4953	Psyr_0561	CN228_RS28115		DC3000_Irp,DC3000_4127				0	2	0	0	0.5
PSPPH_0555	PSPTO_4952	Psyr_0562	CN228_RS28110		DC3000_2193				0	1	0	0	0.25
PSPPH_0556	PSPTO_4951	Psyr_0563	CN228_RS28105						0	0	0	0	0
PSPPH_0557	PSPTO_4950	Psyr_0564	CN228_RS28100		DC3000_2193				0	1	0	0	0.25
PSPPH_0558	PSPTO_4949	Psyr_0565	CN228_RS28095						0	0	0	0	0
PSPPH_0559	PSPTO_4948	Psyr_0566	CN228_RS28085						0	0	0	0	0
PSPPH_0560	PSPTO_4947	Psyr_0567	CN228_RS28080						0	0	0	0	0
PSPPH_0561	PSPTO_4946	Psyr_0568	CN228_RS28075		DC3000_Irp				0	1	0	0	0.25
PSPPH_0562	PSPTO_4945	Psyr_0569	CN228_RS28070		DC3000_2193				0	1	0	0	0.25
PSPPH_0563	PSPTO_4944	Psyr_0570	CN228_RS28065		DC3000_2193				0	1	0	0	0.25
PSPPH_0564	PSPTO_4943	Psyr_0571	CN228_RS28060		DC3000_2193				0	1	0	0	0.25
PSPPH_0565	PSPTO_4942	Psyr_0572	CN228_RS28055	PSPPH_Irp,PSPPH_2193,PSPPH_OmpR	DC3000_Irp,DC3000_2193				3	2	0	0	1.25
PSPPH_0566	PSPTO_4941	Psyr_0573	CN228_RS28050	PSPPH_OmpR	DC3000_2193,DC3000_4127				1	2	0	0	0.75
PSPPH_0567	PSPTO_4940	Psyr_0574	CN228_RS28045		DC3000_2193	B728a_OmpR			0	1	1	0	0.5
PSPPH_0568	PSPTO_4939	Psyr_0575	CN228_RS28040		DC3000_2193		CN228_Irp		0	1	0	1	0.5
PSPPH_0569	PSPTO_4938	Psyr_0576	CN228_RS28035	PSPPH_Irp	DC3000_Irp,DC3000_2193	B728a_Irp	CN228_Irp		1	2	1	1	1.25
PSPPH_0570	PSPTO_4937	Psyr_0577	CN228_RS28030						0	0	0	0	0
PSPPH_0571	PSPTO_4936	Psyr_0578	CN228_RS28025		DC3000_2193				0	1	0	0	0.25
PSPPH_0572				PSPPH_Irp					1	0	0	0	0.25
PSPPH_0573									0	0	0	0	0
PSPPH_0574	PSPTO_4935	Psyr_0579	CN228_RS28000		DC3000_Irp,DC3000_2193,DC3000_4127	B728a_Irp,B728a_2193,B728a_3122,B728a_4127,B728a_OmpR	CN228_Irp,CN228_Irp		0	3	5	2	2.5
PSPPH_0575	PSPTO_4934	Psyr_0580	CN228_RS27995	PSPPH_4127					1	0	0	0	0.25
PSPPH_0576	PSPTO_4933	Psyr_0581	CN228_RS27990		DC3000_2193				0	1	0	0	0.25
PSPPH_0577	PSPTO_4932	Psyr_0582	CN228_RS27985				CN228_Irp		0	0	0	1	0.25
PSPPH_0578	PSPTO_4931	Psyr_0583	CN228_RS27980		DC3000_2193		CN228_OmpR		0	1	0	1	0.5
PSPPH_0579	PSPTO_4930	Psyr_0584	CN228_RS27975	PSPPH_2193	DC3000_2193	B728a_2193			1	1	1	0	0.75
PSPPH_0580	PSPTO_4929	Psyr_0585	CN228_RS27970						0	0	0	0	0
PSPPH_0581	PSPTO_4928	Psyr_0587	CN228_RS27965		DC3000_Irp,DC3000_2193		CN228_Irp		0	2	0	1	0.75
PSPPH_0582	PSPTO_4927	Psyr_3540	CN228_RS16605	PSPPH_2193					1	0	0	0	0.25
PSPPH_0583	PSPTO_4926	Psyr_0588	CN228_RS27955		DC3000_2193				0	1	0	0	0.25
PSPPH_0584	PSPTO_4925	Psyr_0589	CN228_RS27950						0	0	0	0	0
PSPPH_0585	PSPTO_4924	Psyr_0590	CN228_RS27945		DC3000_4127		CN228_Irp		0	1	0	1	0.5
PSPPH_0586	PSPTO_4923	Psyr_0591	CN228_RS27940						0	0	0	0	0
PSPPH_0587	PSPTO_4922	Psyr_0594	CN228_RS13010						0	0	0	0	0
PSPPH_0588	PSPTO_4921	Psyr_0595	CN228_RS27775		DC3000_Irp,DC3000_2193		CN228_Irp		0	2	0	1	0.75
PSPPH_0589	PSPTO_4920	Psyr_0596	CN228_RS27770	PSPPH_2193,PSPPH_4127					2	0	0	0	0.5
PSPPH_0590	PSPTO_4919	Psyr_0597	CN228_RS27765		DC3000_2193				0	1	0	0	0.25
PSPPH_0591	PSPTO_4918	Psyr_0598	CN228_RS27760		DC3000_Irp,DC3000_4127		CN228_Irp		0	2	0	1	0.75
PSPPH_0592	PSPTO_4917	Psyr_0599	CN228_RS27755		DC3000_2193				0	1	0	0	0.25
PSPPH_0593	PSPTO_4916	Psyr_0600	CN228_RS27750		DC3000_2193				0	1	0	0	0.25
PSPPH_0594	PSPTO_4915	Psyr_0601	CN228_RS27745						0	0	0	0	0
PSPPH_0595	PSPTOA0031	Psyr_0947	CN228_RS00425	PSPPH_OmpR					1	0	0	0	0.25
PSPPH_0596	PSPTO_4608	Psyr_1475	CN228_RS08915	PSPPH_Irp,PSPPH_OmpR	DC3000_Irp,DC3000_2193,DC3000_4127				2	3	0	0	1.25
PSPPH_0597	PSPTO_4914	Psyr_0602	CN228_RS27735	PSPPH_2193	DC3000_Irp,DC3000_2193,DC3000_4127		CN228_Irp		1	3	0	1	1.25
PSPPH_0598	PSPTO_4913	Psyr_0603	CN228_RS27730						0	0	0	0	0
PSPPH_0599	PSPTO_0698	Psyr_0604	CN228_RS03175						0	0	0	0	0
PSPPH_0600	PSPTO_0699	Psyr_0605	CN228_RS03180						0	0	0	0	0
PSPPH_0601	PSPTO_0700	Psyr_0606	CN228_RS03185						0	0	0	0	0
PSPPH_0602	PSPTO_0701	Psyr_0607	CN228_RS03190	PSPPH_3122					1	0	0	0	0.25
PSPPH_0603	PSPTO_0702	Psyr_0608	CN228_RS03195	PSPPH_Irp					1	0	0	0	0.25
PSPPH_0604	PSPTO_0703	Psyr_0609	CN228_RS03200	PSPPH_2193					1	0	0	0	0.25
PSPPH_0605	PSPTO_0704	Psyr_0610	CN228_RS03210		DC3000_2193				0	1	0	0	0.25
PSPPH_0606	PSPTO_4735	Psyr_1970	CN228_RS08410						0	0	0	0	0
PSPPH_0607	PSPTO_5500	Psyr_2715	CN228_RS18995		DC3000_Irp,DC3000_2193				0	2	0	0	0.5
PSPPH_0608	PSPTO_3524	Psyr_3526	CN228_RS11160		DC3000_Irp				0	1	0	0	0.25
PSPPH_0609	PSPTO_2055	Psyr_1864	CN228_RS11685	PSPPH_3122					1	0	0	0	0.25
PSPPH_0610	PSPTO_0012	Psyr_1889	CN228_RS15480	PSPPH_3122	DC3000_Irp,DC3000_2193,DC3000_3122,DC3000_4127				1	4	0	0	1.25
PSPPH_0611	PSPTO_2626	Psyr_4983	CN228_RS30550	PSPPH_Irp					1	0	0	0	0.25
PSPPH_0612	PSPTO_0682	Psyr_5115	CN228_RS03095						0	0	0	0	0
PSPPH_0613	PSPTO_5585	Psyr_0543	CN228_RS19600	PSPPH_OmpR	DC3000_Irp,DC3000_2193,DC3000_4127				1	3	0	0	1
PSPPH_0614	PSPTO_0771	Psyr_3011	CN228_RS15185						0	0	0	0	0
PSPPH_0615	PSPTO_2438	Psyr_1622	CN228_RS08320						0	0	0	0	0
PSPPH_0616	PSPTO_3032	Psyr_1447	CN228_RS18805						0	0	0	0	0
PSPPH_0617	PSPTO_2135	Psyr_3887	CN228_RS22685						0	0	0	0	0
PSPPH_0618									0	0	0	0	0
PSPPH_0619	PSPTO_0537	Psyr_4641	CN228_RS02295	PSPPH_2193,PSPPH_4127,PSPPH_OmpR	DC3000_Irp,DC3000_2193,DC3000_4127	B728a_4127	CN228_4127	PSPPH_4127	3	3	2	1	2.25
PSPPH_0620	PSPTO_0538	Psyr_4640	CN228_RS02300	PSPPH_4127					1	0	0	0	0.25
PSPPH_0621	PSPTO_0539	Psyr_4639	CN228_RS02305						0	0	0	0	0
PSPPH_0622	PSPTO_0540	Psyr_4638	CN228_RS02310						0	0	0	0	0
PSPPH_0623	PSPTO_0541	Psyr_4637	CN228_RS02315						0	0	0	0	0
PSPPH_0624	PSPTO_0542	Psyr_4636	CN228_RS02320						0	0	0	0	0
PSPPH_0625	PSPTO_0543	Psyr_4635	CN228_RS02325						0	0	0	0	0
PSPPH_0626	PSPTO_0544	Psyr_4634	CN228_RS02330	PSPPH_Irp	DC3000_Irp		CN228_Irp		1	1	0	1	0.75
PSPPH_0627	PSPTO_0545	Psyr_4633	CN228_RS02335	PSPPH_2193					1	0	0	0	0.25
PSPPH_0628	PSPTO_0546	Psyr_4632	CN228_RS02340						0	0	0	0	0
PSPPH_0629	PSPTO_0547	Psyr_4631	CN228_RS02345		DC3000_Irp				0	1	0	0	0.25
PSPPH_0630	PSPTO_0548	Psyr_4630	CN228_RS02350						0	0	0	0	0
PSPPH_0631	PSPTO_0549	Psyr_4629	CN228_RS02355						0	0	0	0	0
PSPPH_0632	PSPTO_0550	Psyr_4628	CN228_RS02360	PSPPH_Irp					1	0	0	0	0.25
PSPPH_0633	PSPTO_0551	Psyr_4627	CN228_RS02365						0	0	0	0	0
PSPPH_0634	PSPTO_0552	Psyr_4626	CN228_RS02370						0	0	0	0	0
PSPPH_0635	PSPTO_0553	Psyr_4625	CN228_RS02375		DC3000_2193	B728a_4127			0	1	1	0	0.5
PSPPH_0636	PSPTO_0554	Psyr_4624	CN228_RS02380						0	0	0	0	0
PSPPH_0637	PSPTO_0555	Psyr_4623	CN228_RS02385						0	0	0	0	0
PSPPH_0638	PSPTO_0556	Psyr_4622	CN228_RS02390	PSPPH_4127					1	0	0	0	0.25
PSPPH_0639	PSPTO_0557	Psyr_4621	CN228_RS02395						0	0	0	0	0
PSPPH_0640	PSPTO_0558	Psyr_4620	CN228_RS02400						0	0	0	0	0
PSPPH_0641	PSPTO_0559	Psyr_4619	CN228_RS02405						0	0	0	0	0
PSPPH_0642	PSPTO_0560	Psyr_4618	CN228_RS02410						0	0	0	0	0
PSPPH_0643	PSPTO_0562	Psyr_4615	CN228_RS02420						0	0	0	0	0
PSPPH_0644	PSPTO_0563	Psyr_4614	CN228_RS02425						0	0	0	0	0
PSPPH_0645	PSPTO_0564	Psyr_4613	CN228_RS02430						0	0	0	0	0
PSPPH_0646	PSPTO_0565	Psyr_4612	CN228_RS02435						0	0	0	0	0
PSPPH_0647	PSPTO_0566	Psyr_4611	CN228_RS02440						0	0	0	0	0
PSPPH_0648	PSPTO_0567	Psyr_4610	CN228_RS02445		DC3000_4127				0	1	0	0	0.25
PSPPH_0649	PSPTO_0568	Psyr_4609	CN228_RS02450			B728a_4127			0	0	1	0	0.25
PSPPH_0650	PSPTO_0569	Psyr_4606	CN228_RS02460						0	0	0	0	0
PSPPH_0651	PSPTO_0570	Psyr_4605	CN228_RS02475		DC3000_2193				0	1	0	0	0.25
PSPPH_0652	PSPTO_3155	Psyr_4604	CN228_RS02480						0	0	0	0	0
PSPPH_0653	PSPTO_0571	Psyr_4603	CN228_RS02485		DC3000_2193				0	1	0	0	0.25
PSPPH_0654	PSPTO_2158	Psyr_4602	CN228_RS02490		DC3000_4127				0	1	0	0	0.25
PSPPH_0655	PSPTO_1453	Psyr_4600	CN228_RS02505						0	0	0	0	0
PSPPH_0656	PSPTO_0573	Psyr_4599	CN228_RS02510		DC3000_Irp,DC3000_4127				0	2	0	0	0.5
PSPPH_0657	PSPTO_0574	Psyr_4598	CN228_RS02515						0	0	0	0	0
PSPPH_0658	PSPTO_0575	Psyr_4597	CN228_RS02520						0	0	0	0	0
PSPPH_0659	PSPTO_0578	Psyr_4594	CN228_RS02535						0	0	0	0	0
PSPPH_0660	PSPTO_0579	Psyr_4593	CN228_RS02540						0	0	0	0	0
PSPPH_0661									0	0	0	0	0
PSPPH_0662	PSPTO_0581	Psyr_4591	CN228_RS02555						0	0	0	0	0
PSPPH_0663	PSPTO_4772	Psyr_4590	CN228_RS02560		DC3000_2193				0	1	0	0	0.25
PSPPH_0664	PSPTO_0382	Psyr_4589	CN228_RS02565						0	0	0	0	0
PSPPH_0665	PSPTO_3389	Psyr_4583	CN228_RS02595						0	0	0	0	0
PSPPH_0666	PSPTO_3309	Psyr_4582	CN228_RS02600						0	0	0	0	0
PSPPH_0667	PSPTO_2400	Psyr_1226	CN228_RS17810	PSPPH_2193,PSPPH_OmpR					2	0	0	0	0.5
PSPPH_0668	PSPTO_3811	Psyr_1668	CN228_RS05755						0	0	0	0	0
PSPPH_0669	PSPTO_2602	Psyr_3329	CN228_RS00505						0	0	0	0	0
PSPPH_0670	PSPTO_3393	Psyr_4984	CN228_RS23610						0	0	0	0	0
PSPPH_0671	PSPTO_0591	Psyr_0736	CN228_RS08680						0	0	0	0	0
PSPPH_0672	PSPTO_0592	Psyr_4581	CN228_RS02605						0	0	0	0	0
PSPPH_0673	PSPTO_0593	Psyr_4580	CN228_RS02610						0	0	0	0	0
PSPPH_0674	PSPTO_0594	Psyr_4579	CN228_RS02615						0	0	0	0	0
PSPPH_0675	PSPTO_0595	Psyr_4578	CN228_RS02620						0	0	0	0	0
PSPPH_0676	PSPTO_0596	Psyr_4577	CN228_RS02625	PSPPH_2193	DC3000_Irp		CN228_Irp		1	1	0	1	0.75
PSPPH_0677	PSPTO_0597	Psyr_4576	CN228_RS02630						0	0	0	0	0
PSPPH_0678	PSPTO_0598	Psyr_4575	CN228_RS02635						0	0	0	0	0
PSPPH_0679	PSPTO_0599	Psyr_4574	CN228_RS02640						0	0	0	0	0
PSPPH_0680	PSPTO_0600	Psyr_4573	CN228_RS02645						0	0	0	0	0
PSPPH_0681	PSPTO_0601	Psyr_4572	CN228_RS02650						0	0	0	0	0
PSPPH_0682	PSPTO_0602	Psyr_4571	CN228_RS02655						0	0	0	0	0
PSPPH_0683	PSPTO_0603	Psyr_4570	CN228_RS02660	PSPPH_Irp	DC3000_Irp,DC3000_2193,DC3000_4127		CN228_Irp		1	3	0	1	1.25
PSPPH_0684	PSPTO_0604	Psyr_4569	CN228_RS02665						0	0	0	0	0
PSPPH_0685	PSPTO_0605	Psyr_4568	CN228_RS02670		DC3000_Irp,DC3000_2193				0	2	0	0	0.5
PSPPH_0686	PSPTO_0606	Psyr_4567	CN228_RS02675	PSPPH_2193	DC3000_Irp,DC3000_2193				1	2	0	0	0.75
PSPPH_0687	PSPTO_0607	Psyr_4566	CN228_RS02680	PSPPH_2193	DC3000_Irp,DC3000_2193				1	2	0	0	0.75
PSPPH_0688	PSPTO_0609	Psyr_4565	CN228_RS02690			B728a_Irp,B728a_OmpR			0	0	2	0	0.5
PSPPH_0689									0	0	0	0	0
PSPPH_0690									0	0	0	0	0
PSPPH_0691									0	0	0	0	0
PSPPH_0692									0	0	0	0	0
PSPPH_0693									0	0	0	0	0
PSPPH_0694	PSPTO_0776	Psyr_0680	CN228_RS03590						0	0	0	0	0
PSPPH_0695	PSPTO_0777	Psyr_0681	CN228_RS03595	PSPPH_Irp	DC3000_2193				1	1	0	0	0.5
PSPPH_0696	PSPTO_0778	Psyr_0682	CN228_RS03600		DC3000_4127				0	1	0	0	0.25
PSPPH_0697	PSPTO_4397	Psyr_0683	CN228_RS25000	PSPPH_4127		B728a_4127			1	0	1	0	0.5
PSPPH_0698	PSPTO_3756	Psyr_0685	CN228_RS01010						0	0	0	0	0
PSPPH_0699	PSPTO_2135	Psyr_3887	CN228_RS22685						0	0	0	0	0
PSPPH_0700	PSPTO_0781	Psyr_0688	CN228_RS05190						0	0	0	0	0
PSPPH_0701	PSPTO_0787	Psyr_0691	CN228_RS05220		DC3000_2193				0	1	0	0	0.25
PSPPH_0702	PSPTO_0788	Psyr_0692	CN228_RS05225						0	0	0	0	0
PSPPH_0703	PSPTO_0788	Psyr_0692	CN228_RS05225						0	0	0	0	0
PSPPH_0704	PSPTO_0789	Psyr_0693	CN228_RS05230						0	0	0	0	0
PSPPH_0705	PSPTO_0790	Psyr_0694	CN228_RS05235						0	0	0	0	0
PSPPH_0706	PSPTO_0791	Psyr_0695	CN228_RS05240	PSPPH_4127					1	0	0	0	0.25
PSPPH_0707									0	0	0	0	0
PSPPH_0708	PSPTO_0794	Psyr_0697	CN228_RS05255						0	0	0	0	0
PSPPH_0709	PSPTO_0795	Psyr_3825	CN228_RS05260						0	0	0	0	0
PSPPH_0710	PSPTO_2699	Psyr_3382	CN228_RS14250	PSPPH_2193					1	0	0	0	0.25
PSPPH_0711	PSPTO_3182	Psyr_3062	CN228_RS22540	PSPPH_Irp	DC3000_Irp,DC3000_2193,DC3000_4127,DC3000_OmpR				1	4	0	0	1.25
PSPPH_0712	PSPTO_0796	Psyr_0700	CN228_RS05265	PSPPH_Irp,PSPPH_OmpR	DC3000_Irp,DC3000_2193	B728a_Irp,B728a_OmpR	CN228_Irp,CN228_OmpR		2	2	2	2	2
PSPPH_0713	PSPTO_0797	Psyr_0701	CN228_RS05270						0	0	0	0	0
PSPPH_0714	PSPTO_0798	Psyr_0702	CN228_RS05275	PSPPH_2193		B728a_OmpR			1	0	1	0	0.5
PSPPH_0715	PSPTO_0799	Psyr_0703	CN228_RS05280						0	0	0	0	0
PSPPH_0716	PSPTO_0800	Psyr_0704	CN228_RS05285						0	0	0	0	0
PSPPH_0717	PSPTO_0801	Psyr_0705	CN228_RS05290		DC3000_2193				0	1	0	0	0.25
PSPPH_0718	PSPTO_0802	Psyr_0707	CN228_RS27415		DC3000_2193				0	1	0	0	0.25
PSPPH_0719	PSPTO_0804	Psyr_0708	CN228_RS27405						0	0	0	0	0
PSPPH_0720	PSPTO_0805	Psyr_0709	CN228_RS27400	PSPPH_OmpR	DC3000_Irp,DC3000_2193,DC3000_4127		CN228_Irp,CN228_Irp		1	3	0	2	1.5
PSPPH_0721	PSPTO_0806	Psyr_0710	CN228_RS27395				CN228_Irp		0	0	0	1	0.25
PSPPH_0722	PSPTO_0807	Psyr_0711	CN228_RS27390						0	0	0	0	0
PSPPH_0723	PSPTO_0808	Psyr_0712	CN228_RS27385						0	0	0	0	0
PSPPH_0724	PSPTO_0809	Psyr_0713	CN228_RS27380						0	0	0	0	0
PSPPH_0725	PSPTO_0810	Psyr_0714	CN228_RS27375	PSPPH_2193	DC3000_2193				1	1	0	0	0.5
PSPPH_0726	PSPTO_0811	Psyr_0715	CN228_RS27370						0	0	0	0	0
PSPPH_0727	PSPTO_0812	Psyr_0716	CN228_RS27365		DC3000_4127				0	1	0	0	0.25
PSPPH_0728	PSPTO_0813	Psyr_0717	CN228_RS27360						0	0	0	0	0
PSPPH_0729	PSPTO_0814	Psyr_0718	CN228_RS27355	PSPPH_Irp	DC3000_Irp		CN228_Irp		1	1	0	1	0.75
PSPPH_0730	PSPTO_0815	Psyr_0719	CN228_RS27350						0	0	0	0	0
PSPPH_0731	PSPTO_0816	Psyr_0720	CN228_RS27345	PSPPH_2193	DC3000_2193,DC3000_4127		CN228_Irp		1	2	0	1	1
PSPPH_0732	PSPTO_0817	Psyr_0721	CN228_RS27340		DC3000_4127				0	1	0	0	0.25
PSPPH_0733	PSPTO_0820	Psyr_2194	CN228_RS27335	PSPPH_Irp					1	0	0	0	0.25
PSPPH_0734	PSPTO_0821	Psyr_2193	CN228_RS27330			B728a_4127			0	0	1	0	0.25
PSPPH_0735	PSPTO_0822	Psyr_2192	CN228_RS27325		DC3000_2193				0	1	0	0	0.25
PSPPH_0736	PSPTO_0823	Psyr_0722	CN228_RS27320				CN228_Irp		0	0	0	1	0.25
PSPPH_0737	PSPTO_0824	Psyr_0723	CN228_RS27315						0	0	0	0	0
PSPPH_0738	PSPTO_0825	Psyr_0724	CN228_RS27310						0	0	0	0	0
PSPPH_0739	PSPTO_0826	Psyr_0725	CN228_RS27305						0	0	0	0	0
PSPPH_0740	PSPTO_0827	Psyr_0726	CN228_RS27300						0	0	0	0	0
PSPPH_0741	PSPTO_0828	Psyr_0727	CN228_RS27295						0	0	0	0	0
PSPPH_0742	PSPTO_0829	Psyr_0728	CN228_RS27290	PSPPH_OmpR	DC3000_Irp,DC3000_2193	B728a_Irp			1	2	1	0	1
PSPPH_0743									0	0	0	0	0
PSPPH_0744									0	0	0	0	0
PSPPH_0745									0	0	0	0	0
PSPPH_0746									0	0	0	0	0
PSPPH_0747	PSPTO_0287	Psyr_1421	CN228_RS08630		DC3000_Irp,DC3000_2193				0	2	0	0	0.5
PSPPH_0748	PSPTO_2917	Psyr_1395	CN228_RS22685						0	0	0	0	0
PSPPH_0749	PSPTO_2084	Psyr_1426	CN228_RS09325						0	0	0	0	0
PSPPH_0750	PSPTO_0848	Psyr_1428	CN228_RS08715	PSPPH_OmpR					1	0	0	0	0.25
PSPPH_0751	PSPTO_2282	Psyr_2593	CN228_RS10045						0	0	0	0	0
PSPPH_0752	PSPTO_4570	Psyr_1463	CN228_RS08845	PSPPH_OmpR	DC3000_Irp,DC3000_2193,DC3000_4127				1	3	0	0	1
PSPPH_0753	PSPTO_5248	Psyr_1474	CN228_RS29765						0	0	0	0	0
PSPPH_0754									0	0	0	0	0
PSPPH_0755	PSPTO_3576	Psyr_3347	CN228_RS12445	PSPPH_OmpR					1	0	0	0	0.25
PSPPH_0756	PSPTO_3170	Psyr_1781	CN228_RS20885	PSPPH_OmpR					1	0	0	0	0.25
PSPPH_0757	PSPTO_1492	Psyr_1507	CN228_RS07575	PSPPH_Irp					1	0	0	0	0.25
PSPPH_0758	PSPTO_4608	Psyr_1508	CN228_RS09020						0	0	0	0	0
PSPPH_0759	PSPTO_B0007	Psyr_1509	CN228_RS09080	PSPPH_Irp					1	0	0	0	0.25
PSPPH_0760	PSPTO_0815	Psyr_1510	CN228_RS09085						0	0	0	0	0
PSPPH_0761	PSPTO_0850	Psyr_1430	CN228_RS08255						0	0	0	0	0
PSPPH_0762	PSPTO_0851	Psyr_0766	CN228_RS12915	PSPPH_2193	DC3000_2193				1	1	0	0	0.5
PSPPH_0763	PSPTO_0852	Psyr_4357	CN228_RS04970	PSPPH_OmpR	DC3000_2193,DC3000_4127		CN228_4127		1	2	0	1	1
PSPPH_0764	PSPTO_0853	Psyr_1311	CN228_RS32820						0	0	0	0	0
PSPPH_0765	PSPTO_0854	Psyr_1128	CN228_RS32825						0	0	0	0	0
PSPPH_0766									0	0	0	0	0
PSPPH_0767	PSPTO_4727	Psyr_3416	CN228_RS05455	PSPPH_3122	DC3000_Irp,DC3000_2193,DC3000_4127				1	3	0	0	1
PSPPH_0768	PSPTO_0857	Psyr_1440	CN228_RS09400						0	0	0	0	0
PSPPH_0769	PSPTO_2160	Psyr_1970	CN228_RS08410						0	0	0	0	0
PSPPH_0770	PSPTO_2212	Psyr_2021	CN228_RS18375						0	0	0	0	0
PSPPH_0771	PSPTO_2757	Psyr_2486	CN228_RS14395		DC3000_Irp,DC3000_2193,DC3000_4127	B728a_Irp			0	3	1	0	1
PSPPH_0772	PSPTO_3900	Psyr_1585	CN228_RS23240			B728a_OmpR			0	0	1	0	0.25
PSPPH_0773									0	0	0	0	0
PSPPH_0774	PSPTO_3230	Psyr_0270	CN228_RS32695		DC3000_2193				0	1	0	0	0.25
PSPPH_0775	PSPTO_3251	Psyr_2847	CN228_RS14405						0	0	0	0	0
PSPPH_0776	PSPTO_4735	Psyr_1970	CN228_RS08410						0	0	0	0	0
PSPPH_0777	PSPTO_1335	Psyr_1151	CN228_RS06740						0	0	0	0	0
PSPPH_0778	PSPTO_1484	Psyr_1294	CN228_RS14360		DC3000_Irp				0	1	0	0	0.25
PSPPH_0779									0	0	0	0	0
PSPPH_0780	PSPTO_4278	Psyr_3213	CN228_RS06440		DC3000_Irp				0	1	0	0	0.25
PSPPH_0781	PSPTO_1495	Psyr_1960	CN228_RS07590						0	0	0	0	0
PSPPH_0782	PSPTO_0591	Psyr_1425	CN228_RS32715	PSPPH_4127					1	0	0	0	0.25
PSPPH_0783	PSPTO_2221	Psyr_4349	CN228_RS18325						0	0	0	0	0
PSPPH_0784	PSPTO_2638	Psyr_1219	CN228_RS03740		DC3000_Irp,DC3000_2193,DC3000_OmpR	B728a_Irp			0	3	1	0	1
PSPPH_0785									0	0	0	0	0
PSPPH_0786	PSPTO_2160	Psyr_1970	CN228_RS08410						0	0	0	0	0
PSPPH_0787	PSPTO_0559	Psyr_3811	CN228_RS00800				CN228_Irp		0	0	0	1	0.25
PSPPH_0788	PSPTO_5509	Psyr_3810	CN228_RS32805						0	0	0	0	0
PSPPH_0789									0	0	0	0	0
PSPPH_0790	PSPTO_0892	Psyr_3733	CN228_RS15460		DC3000_2193,DC3000_4127				0	2	0	0	0.5
PSPPH_0791	PSPTO_0894	Psyr_0946	CN228_RS26940		DC3000_2193				0	1	0	0	0.25
PSPPH_0792	PSPTO_3386	Psyr_3561	CN228_RS22285	PSPPH_OmpR	DC3000_Irp,DC3000_2193,DC3000_4127				1	3	0	0	1
PSPPH_0793	PSPTO_2160	Psyr_1534	CN228_RS06435			B728a_OmpR			0	0	1	0	0.25
PSPPH_0794	PSPTO_3330	Psyr_0933	CN228_RS13575						0	0	0	0	0
PSPPH_0795	PSPTO_2158	Psyr_2864	CN228_RS14665						0	0	0	0	0
PSPPH_0796	PSPTO_0898	Psyr_1939	CN228_RS26920	PSPPH_Irp					1	0	0	0	0.25
PSPPH_0797	PSPTO_0268	Psyr_1960	CN228_RS30745						0	0	0	0	0
PSPPH_0798	PSPTO_1918	Psyr_2643	CN228_RS25440						0	0	0	0	0
PSPPH_0799	PSPTO_0905	Psyr_0771	CN228_RS26910		DC3000_Irp,DC3000_2193				0	2	0	0	0.5
PSPPH_0800	PSPTO_0908	Psyr_0781	CN228_RS26845						0	0	0	0	0
PSPPH_0801	PSPTO_0909	Psyr_0782	CN228_RS26840		DC3000_4127				0	1	0	0	0.25
PSPPH_0802	PSPTO_0910	Psyr_0783	CN228_RS26835						0	0	0	0	0
PSPPH_0803	PSPTO_0911	Psyr_0784	CN228_RS26830						0	0	0	0	0
PSPPH_0804	PSPTO_0912	Psyr_0785	CN228_RS26825						0	0	0	0	0
PSPPH_0805	PSPTO_0913	Psyr_0786	CN228_RS26820						0	0	0	0	0
PSPPH_0806	PSPTO_0914	Psyr_0787	CN228_RS26815						0	0	0	0	0
PSPPH_0807	PSPTO_0915	Psyr_0788	CN228_RS26810						0	0	0	0	0
PSPPH_0808	PSPTO_0916	Psyr_0789	CN228_RS26805	PSPPH_4127					1	0	0	0	0.25
PSPPH_0809	PSPTO_0917	Psyr_0790	CN228_RS26800			B728a_OmpR			0	0	1	0	0.25
PSPPH_0810	PSPTO_0919	Psyr_0791	CN228_RS26790						0	0	0	0	0
PSPPH_0811	PSPTO_0920	Psyr_0792	CN228_RS26785	PSPPH_Irp	DC3000_Irp				1	1	0	0	0.5
PSPPH_0812	PSPTO_4977	Psyr_3077	CN228_RS26780				CN228_Irp		0	0	0	1	0.25
PSPPH_0813	PSPTO_3071	Psyr_3076	CN228_RS16000		DC3000_Irp		CN228_Irp		0	1	0	1	0.5
PSPPH_0814	PSPTO_1309	Psyr_3075	CN228_RS06615		DC3000_Irp,DC3000_2193,DC3000_4127				0	3	0	0	0.75
PSPPH_0815	PSPTO_3332	Psyr_3823	CN228_RS23415		DC3000_Irp,DC3000_2193,DC3000_3122,DC3000_4127,DC3000_OmpR	B728a_4127			0	5	1	0	1.5
PSPPH_0816	PSPTO_0922	Psyr_0794	CN228_RS26760		DC3000_4127	B728a_4127			0	1	1	0	0.5
PSPPH_0817	PSPTO_0923	Psyr_0795	CN228_RS26755						0	0	0	0	0
PSPPH_0818	PSPTO_0924	Psyr_0796	CN228_RS26750		DC3000_Irp,DC3000_2193,DC3000_4127				0	3	0	0	0.75
PSPPH_0819	PSPTO_0925	Psyr_0797	CN228_RS26745						0	0	0	0	0
PSPPH_0820	PSPTO_0926	Psyr_0798	CN228_RS26740	PSPPH_4127	DC3000_Irp,DC3000_2193,DC3000_4127,DC3000_OmpR				1	4	0	0	1.25
PSPPH_0821	PSPTO_0811	Psyr_0715	CN228_RS27345						0	0	0	0	0
PSPPH_0822	PSPTO_2135	Psyr_3887	CN228_RS22685	PSPPH_Irp,PSPPH_3122					2	0	0	0	0.5
PSPPH_0823	PSPTO_B0049	Psyr_4578	CN228_RS26725						0	0	0	0	0
PSPPH_0824									0	0	0	0	0
PSPPH_0825	PSPTO_0932	Psyr_0800	CN228_RS26695	PSPPH_2193	DC3000_Irp,DC3000_2193				1	2	0	0	0.75
PSPPH_0826	PSPTO_0933	Psyr_0801	CN228_RS26690						0	0	0	0	0
PSPPH_0827	PSPTO_0934	Psyr_0802	CN228_RS26685	PSPPH_Irp					1	0	0	0	0.25
PSPPH_0828	PSPTO_0935	Psyr_0803	CN228_RS26680						0	0	0	0	0
PSPPH_0829	PSPTO_0936	Psyr_0804	CN228_RS26675						0	0	0	0	0
PSPPH_0830	PSPTO_0937	Psyr_0805	CN228_RS26670						0	0	0	0	0
PSPPH_0831	PSPTO_0938	Psyr_0806	CN228_RS26665						0	0	0	0	0
PSPPH_0832	PSPTO_0939	Psyr_0807	CN228_RS26660	PSPPH_Irp,PSPPH_2193	DC3000_Irp				2	1	0	0	0.75
PSPPH_0833	PSPTO_0940	Psyr_0808	CN228_RS26655	PSPPH_Irp	DC3000_Irp	B728a_Irp,B728a_OmpR	CN228_Irp	Irp	1	1	2	1	1.25
PSPPH_0834	PSPTO_0941	Psyr_0809	CN228_RS26650						0	0	0	0	0
PSPPH_0835	PSPTO_0942	Psyr_0810	CN228_RS26645		DC3000_Irp				0	1	0	0	0.25
PSPPH_0836	PSPTO_0943	Psyr_0811	CN228_RS26640						0	0	0	0	0
PSPPH_0837	PSPTO_0944	Psyr_0812	CN228_RS26635						0	0	0	0	0
PSPPH_0838	PSPTO_0945	Psyr_0813	CN228_RS26630		DC3000_Irp				0	1	0	0	0.25
PSPPH_0839	PSPTO_0946	Psyr_0252	CN228_RS26625						0	0	0	0	0
PSPPH_0840	PSPTO_0947	Psyr_0814	CN228_RS26620						0	0	0	0	0
PSPPH_0841	PSPTO_0948	Psyr_0815	CN228_RS26615	PSPPH_2193	DC3000_Irp,DC3000_2193				1	2	0	0	0.75
PSPPH_0842	PSPTO_0949	Psyr_0816	CN228_RS26610	PSPPH_OmpR					1	0	0	0	0.25
PSPPH_0843	PSPTO_0950	Psyr_0817	CN228_RS26590						0	0	0	0	0
PSPPH_0844	PSPTO_0951	Psyr_0818	CN228_RS26585						0	0	0	0	0
PSPPH_0845	PSPTO_0952	Psyr_0819	CN228_RS26575			B728a_OmpR			0	0	1	0	0.25
PSPPH_0846	PSPTO_0953	Psyr_0820	CN228_RS26570	PSPPH_Irp	DC3000_Irp,DC3000_2193	B728a_Irp			1	2	1	0	1
PSPPH_0847	PSPTO_0954	Psyr_0821	CN228_RS26565						0	0	0	0	0
PSPPH_0848	PSPTO_0955	Psyr_0822	CN228_RS26560		DC3000_2193				0	1	0	0	0.25
PSPPH_0849	PSPTO_0956	Psyr_0823	CN228_RS26555						0	0	0	0	0
PSPPH_0850	PSPTO_0957	Psyr_0824	CN228_RS26550						0	0	0	0	0
PSPPH_0851	PSPTO_0958	Psyr_0825	CN228_RS26535		DC3000_Irp		CN228_Irp		0	1	0	1	0.5
PSPPH_0852	PSPTO_0959	Psyr_0826	CN228_RS26530	PSPPH_Irp	DC3000_Irp,DC3000_3122				1	2	0	0	0.75
PSPPH_0853	PSPTO_0960	Psyr_0827	CN228_RS26525						0	0	0	0	0
PSPPH_0854	PSPTO_0961	Psyr_0828	CN228_RS26520						0	0	0	0	0
PSPPH_0855	PSPTO_0962	Psyr_0829	CN228_RS26515	PSPPH_2193					1	0	0	0	0.25
PSPPH_0856	PSPTO_0963	Psyr_0830	CN228_RS26510	PSPPH_Irp,PSPPH_2193	DC3000_Irp,DC3000_2193,DC3000_4127	B728a_3122,B728a_4127,B728a_OmpR			2	3	3	0	2
PSPPH_0857	PSPTO_0964	Psyr_0831	CN228_RS26505		DC3000_4127				0	1	0	0	0.25
PSPPH_0858	PSPTO_0965	Psyr_0832	CN228_RS26500						0	0	0	0	0
PSPPH_0859	PSPTO_0966	Psyr_0833	CN228_RS26495						0	0	0	0	0
PSPPH_0860	PSPTO_0967	Psyr_0834	CN228_RS26490						0	0	0	0	0
PSPPH_0861	PSPTO_0969	Psyr_0835	CN228_RS26465	PSPPH_2193					1	0	0	0	0.25
PSPPH_0862	PSPTO_0970	Psyr_0836	CN228_RS26460	PSPPH_OmpR	DC3000_Irp,DC3000_2193				1	2	0	0	0.75
PSPPH_0863	PSPTO_0971	Psyr_0837	CN228_RS26455						0	0	0	0	0
PSPPH_0864	PSPTO_0972	Psyr_0838	CN228_RS26450						0	0	0	0	0
PSPPH_0865	PSPTO_0973	Psyr_0839	CN228_RS26445						0	0	0	0	0
PSPPH_0866	PSPTO_0975	Psyr_0840	CN228_RS26440		DC3000_4127				0	1	0	0	0.25
PSPPH_0867	PSPTO_0976	Psyr_0841	CN228_RS26435						0	0	0	0	0
PSPPH_0868	PSPTO_0977	Psyr_0842	CN228_RS26430	PSPPH_OmpR					1	0	0	0	0.25
PSPPH_0869	PSPTO_0978	Psyr_0843	CN228_RS26425						0	0	0	0	0
PSPPH_0870	PSPTO_0979	Psyr_0844	CN228_RS26420						0	0	0	0	0
PSPPH_0871	PSPTO_0980	Psyr_0845	CN228_RS26415	PSPPH_2193	DC3000_2193				1	1	0	0	0.5
PSPPH_0872	PSPTO_0981	Psyr_0846	CN228_RS26410	PSPPH_OmpR					1	0	0	0	0.25
PSPPH_0873	PSPTO_0982	Psyr_0847	CN228_RS26405	PSPPH_3122					1	0	0	0	0.25
PSPPH_0874	PSPTO_0983	Psyr_0848	CN228_RS26400		DC3000_Irp				0	1	0	0	0.25
PSPPH_0875	PSPTO_0984	Psyr_0849	CN228_RS26395						0	0	0	0	0
PSPPH_0876	PSPTO_0985	Psyr_0850	CN228_RS26390		DC3000_2193				0	1	0	0	0.25
PSPPH_0877	PSPTO_0986	Psyr_0851	CN228_RS26385		DC3000_4127				0	1	0	0	0.25
PSPPH_0878									0	0	0	0	0
PSPPH_0879									0	0	0	0	0
PSPPH_0880									0	0	0	0	0
PSPPH_0881									0	0	0	0	0
PSPPH_0882									0	0	0	0	0
PSPPH_0883	PSPTO_4468	Psyr_0852	CN228_RS25375						0	0	0	0	0
PSPPH_0884	PSPTO_0988	Psyr_0853	CN228_RS26345						0	0	0	0	0
PSPPH_0885	PSPTO_0989	Psyr_0854	CN228_RS26340						0	0	0	0	0
PSPPH_0886	PSPTO_0990	Psyr_0855	CN228_RS26335						0	0	0	0	0
PSPPH_0887	PSPTO_0991	Psyr_0856	CN228_RS26330						0	0	0	0	0
PSPPH_0888	PSPTO_0992	Psyr_0857	CN228_RS26325						0	0	0	0	0
PSPPH_0889	PSPTO_0993	Psyr_0858	CN228_RS26320						0	0	0	0	0
PSPPH_0890	PSPTO_0994	Psyr_0859	CN228_RS26315						0	0	0	0	0
PSPPH_0891	PSPTO_0995	Psyr_0860	CN228_RS26310		DC3000_2193				0	1	0	0	0.25
PSPPH_0892	PSPTO_0996	Psyr_0861	CN228_RS26305	PSPPH_Irp	DC3000_4127				1	1	0	0	0.5
PSPPH_0893	PSPTO_0997	Psyr_0862	CN228_RS19725						0	0	0	0	0
PSPPH_0894									0	0	0	0	0
PSPPH_0895	PSPTO_0997	Psyr_0862	CN228_RS28075						0	0	0	0	0
PSPPH_0896	PSPTO_0997	Psyr_0862	CN228_RS00395	PSPPH_2193					1	0	0	0	0.25
PSPPH_0897	PSPTO_0998	Psyr_0863	CN228_RS26290		DC3000_Irp,DC3000_2193				0	2	0	0	0.5
PSPPH_0898	PSPTO_4436	Psyr_0864	CN228_RS25210						0	0	0	0	0
PSPPH_0899	PSPTO_4735	Psyr_1970	CN228_RS08410						0	0	0	0	0
PSPPH_0900	PSPTO_0999	Psyr_0865	CN228_RS26285						0	0	0	0	0
PSPPH_0901	PSPTO_1000	Psyr_0866	CN228_RS26280		DC3000_Irp				0	1	0	0	0.25
PSPPH_0902	PSPTO_1001	Psyr_0867	CN228_RS26275		DC3000_2193	B728a_OmpR			0	1	1	0	0.5
PSPPH_0903	PSPTO_3580	Psyr_0868	CN228_RS26270		DC3000_Irp,DC3000_2193,DC3000_4127				0	3	0	0	0.75
PSPPH_0904	PSPTO_1003	Psyr_0869	CN228_RS26265						0	0	0	0	0
PSPPH_0905	PSPTO_1004	Psyr_0870	CN228_RS26260	PSPPH_2193					1	0	0	0	0.25
PSPPH_0906	PSPTO_1008	Psyr_0871	CN228_RS26255		DC3000_2193				0	1	0	0	0.25
PSPPH_0907	PSPTO_1093	Psyr_3101	CN228_RS15360						0	0	0	0	0
PSPPH_0908	PSPTO_4540	Psyr_2429	CN228_RS07170		DC3000_4127				0	1	0	0	0.25
PSPPH_0909	PSPTO_1009	Psyr_1893	CN228_RS26215						0	0	0	0	0
PSPPH_0910	PSPTO_1010	Psyr_0872	CN228_RS26210		DC3000_4127				0	1	0	0	0.25
PSPPH_0911	PSPTO_1011	Psyr_0873	CN228_RS26205						0	0	0	0	0
PSPPH_0912	PSPTO_1012	Psyr_0874	CN228_RS26200			B728a_OmpR			0	0	1	0	0.25
PSPPH_0913	PSPTO_1013	Psyr_0875	CN228_RS26195						0	0	0	0	0
PSPPH_0914	PSPTO_1014	Psyr_0876	CN228_RS26190						0	0	0	0	0
PSPPH_0915	PSPTO_1023	Psyr_0877	CN228_RS26185						0	0	0	0	0
PSPPH_0916	PSPTO_1024	Psyr_0878	CN228_RS26180						0	0	0	0	0
PSPPH_0917	PSPTO_4735	Psyr_1970	CN228_RS08410						0	0	0	0	0
PSPPH_0918	PSPTO_2612	Psyr_0879	CN228_RS13630						0	0	0	0	0
PSPPH_0919	PSPTO_1025	Psyr_0880	CN228_RS26175						0	0	0	0	0
PSPPH_0920	PSPTO_1036	Psyr_0883	CN228_RS03050	PSPPH_4127					1	0	0	0	0.25
PSPPH_0921	PSPTO_1037	Psyr_0884	CN228_RS26125	PSPPH_4127					1	0	0	0	0.25
PSPPH_0922	PSPTO_1038	Psyr_0885	CN228_RS26120		DC3000_Irp,DC3000_2193	B728a_Irp			0	2	1	0	0.75
PSPPH_0923	PSPTO_1039	Psyr_0886	CN228_RS26115						0	0	0	0	0
PSPPH_0924	PSPTO_1040	Psyr_0887	CN228_RS26110						0	0	0	0	0
PSPPH_0925	PSPTO_1041	Psyr_0888	CN228_RS26105						0	0	0	0	0
PSPPH_0926	PSPTO_1042	Psyr_0891	CN228_RS26095						0	0	0	0	0
PSPPH_0927	PSPTO_1043	Psyr_0892	CN228_RS26090	PSPPH_Irp	DC3000_2193				1	1	0	0	0.5
PSPPH_0928									0	0	0	0	0
PSPPH_0929	PSPTO_1044	Psyr_0644	CN228_RS29095	PSPPH_2193	DC3000_2193				1	1	0	0	0.5
PSPPH_0930	PSPTO_0443	Psyr_3722	CN228_RS31310						0	0	0	0	0
PSPPH_0931	PSPTO_1047	Psyr_0896	CN228_RS26065						0	0	0	0	0
PSPPH_0932	PSPTO_1048	Psyr_0897	CN228_RS20800		DC3000_2193				0	1	0	0	0.25
PSPPH_0933	PSPTO_1049	Psyr_0898	CN228_RS26055						0	0	0	0	0
PSPPH_0934	PSPTO_1050	Psyr_0899	CN228_RS26050						0	0	0	0	0
PSPPH_0935	PSPTO_1051	Psyr_0900	CN228_RS26045						0	0	0	0	0
PSPPH_0936	PSPTO_1052	Psyr_0901	CN228_RS26040	PSPPH_4127		B728a_4127			1	0	1	0	0.5
PSPPH_0937	PSPTO_1053	Psyr_0902	CN228_RS26035			B728a_OmpR			0	0	1	0	0.25
PSPPH_0938	PSPTO_1054	Psyr_0903	CN228_RS26030						0	0	0	0	0
PSPPH_0939	PSPTO_1056	Psyr_0904	CN228_RS24125						0	0	0	0	0
PSPPH_0940	PSPTO_1059	Psyr_0905	CN228_RS26005		DC3000_2193				0	1	0	0	0.25
PSPPH_0941									0	0	0	0	0
PSPPH_0942	PSPTO_1062	Psyr_0907	CN228_RS25995		DC3000_Irp,DC3000_2193,DC3000_4127				0	3	0	0	0.75
PSPPH_0943	PSPTO_2718	Psyr_2451	CN228_RS15685						0	0	0	0	0
PSPPH_0944	PSPTO_1490	Psyr_3355	CN228_RS12405		DC3000_OmpR	B728a_Irp			0	1	1	0	0.5
PSPPH_0945	PSPTO_3734	Psyr_4737	CN228_RS29465						0	0	0	0	0
PSPPH_0946	PSPTO_0268	Psyr_0138	CN228_RS30745	PSPPH_OmpR					1	0	0	0	0.25
PSPPH_0947	PSPTO_4459	Psyr_4152	CN228_RS30650						0	0	0	0	0
PSPPH_0948									0	0	0	0	0
PSPPH_0949	PSPTO_1065	Psyr_0912	CN228_RS25805		DC3000_2193				0	1	0	0	0.25
PSPPH_0950	PSPTO_1066	Psyr_0913	CN228_RS25800	PSPPH_Irp	DC3000_Irp				1	1	0	0	0.5
PSPPH_0951	PSPTO_4991	Psyr_0914	CN228_RS25795	PSPPH_Irp					1	0	0	0	0.25
PSPPH_0952	PSPTO_1007	Psyr_0915	CN228_RS25790		DC3000_Irp				0	1	0	0	0.25
PSPPH_0953	PSPTO_1005	Psyr_0916	CN228_RS25785	PSPPH_Irp,PSPPH_2193	DC3000_2193	B728a_OmpR			2	1	1	0	1
PSPPH_0954	PSPTO_0924	Psyr_0917	CN228_RS25780						0	0	0	0	0
PSPPH_0955	PSPTO_0705	Psyr_0918	CN228_RS25775						0	0	0	0	0
PSPPH_0956	PSPTO_5105	Psyr_0919	CN228_RS25770						0	0	0	0	0
PSPPH_0957	PSPTO_3447	Psyr_0920	CN228_RS25765	PSPPH_Irp	DC3000_Irp,DC3000_4127				1	2	0	0	0.75
PSPPH_0958	PSPTO_1007	Psyr_2704	CN228_RS25760	PSPPH_OmpR			CN228_Irp		1	0	0	1	0.5
PSPPH_0959	PSPTOA0024	Psyr_0986	CN228_RS25755						0	0	0	0	0
PSPPH_0960	PSPTO_4400	Psyr_3265	CN228_RS25750		DC3000_Irp,DC3000_2193,DC3000_3122	B728a_Irp			0	3	1	0	1
PSPPH_0961	PSPTO_1556	Psyr_1365	CN228_RS25745						0	0	0	0	0
PSPPH_0962	PSPTO_4068	Psyr_4574	CN228_RS25740						0	0	0	0	0
PSPPH_0963	PSPTO_0255	Psyr_0151	CN228_RS25735						0	0	0	0	0
PSPPH_0964	PSPTO_3824	Psyr_2771	CN228_RS25730	PSPPH_OmpR					1	0	0	0	0.25
PSPPH_0965	PSPTO_4792	Psyr_4314	CN228_RS25725		DC3000_Irp				0	1	0	0	0.25
PSPPH_0966	PSPTO_B0039	Psyr_1040	CN228_RS16260						0	0	0	0	0
PSPPH_0967	PSPTO_1079	Psyr_0924	CN228_RS25720						0	0	0	0	0
PSPPH_0968	PSPTO_1080	Psyr_0925	CN228_RS25715						0	0	0	0	0
PSPPH_0969	PSPTO_5396	Psyr_0926	CN228_RS25710						0	0	0	0	0
PSPPH_0970	PSPTO_4699	Psyr_0927	CN228_RS24165		DC3000_Irp,DC3000_2193				0	2	0	0	0.5
PSPPH_0971	PSPTO_0791	Psyr_0695	CN228_RS05240						0	0	0	0	0
PSPPH_0972	PSPTO_3942	Psyr_1827	CN228_RS11480		DC3000_Irp,DC3000_4127				0	2	0	0	0.5
PSPPH_0973	PSPTO_2830	Psyr_3121	CN228_RS10020						0	0	0	0	0
PSPPH_0974	PSPTO_3082	Psyr_3226	CN228_RS18635						0	0	0	0	0
PSPPH_0975	PSPTO_1074	Psyr_0929	CN228_RS05355		DC3000_Irp,DC3000_2193				0	2	0	0	0.5
PSPPH_0976	PSPTO_0698	Psyr_0930	CN228_RS05360			B728a_OmpR			0	0	1	0	0.25
PSPPH_0977	PSPTO_1947	Psyr_0930	CN228_RS05360						0	0	0	0	0
PSPPH_0978	PSPTO_3332	Psyr_0931	CN228_RS13175	PSPPH_Irp		B728a_Irp			1	0	1	0	0.5
PSPPH_0979	PSPTOA0012	Psyr_0932	CN228_RS06100			B728a_OmpR			0	0	1	0	0.25
PSPPH_0980	PSPTO_3330	Psyr_0933	CN228_RS05380						0	0	0	0	0
PSPPH_0981	PSPTO_0251	Psyr_0934	CN228_RS05385			B728a_Irp	CN228_Irp		0	0	1	1	0.5
PSPPH_0982	PSPTO_0619	Psyr_0935	CN228_RS05390						0	0	0	0	0
PSPPH_0983	PSPTO_3446	Psyr_0936	CN228_RS05395						0	0	0	0	0
PSPPH_0984	PSPTO_1230	Psyr_0937	CN228_RS05400						0	0	0	0	0
PSPPH_0985	PSPTO_0032	Psyr_2905	CN228_RS28510				CN228_Irp		0	0	0	1	0.25
PSPPH_0986	PSPTO_B0040	Psyr_1736	CN228_RS15965	PSPPH_2193					1	0	0	0	0.25
PSPPH_0987	PSPTO_B0039	Psyr_0197	CN228_RS25855						0	0	0	0	0
PSPPH_0988	PSPTO_1101	Psyr_0941	CN228_RS05415						0	0	0	0	0
PSPPH_0989	PSPTO_1102	Psyr_0942	CN228_RS05420	PSPPH_Irp	DC3000_4127	B728a_4127			1	1	1	0	0.75
PSPPH_0990	PSPTO_1103	Psyr_0943	CN228_RS05425		DC3000_3122				0	1	0	0	0.25
PSPPH_0991	PSPTO_1104	Psyr_0944	CN228_RS05430	PSPPH_Irp,PSPPH_OmpR	DC3000_Irp,DC3000_2193,DC3000_3122,DC3000_4127,DC3000_OmpR	B728a_Irp,B728a_2193,B728a_3122,B728a_4127,B728a_OmpR	CN228_OmpR		2	5	5	1	3.25
PSPPH_0992									0	0	0	0	0
PSPPH_0993	PSPTO_1105	Psyr_0945	CN228_RS05440						0	0	0	0	0
PSPPH_0994	PSPTO_1106	Psyr_0946	CN228_RS05445						0	0	0	0	0
PSPPH_0995	PSPTO_1107	Psyr_0947	CN228_RS05450	PSPPH_OmpR					1	0	0	0	0.25
PSPPH_0996	PSPTO_1108	Psyr_0948	CN228_RS05455	PSPPH_OmpR		B728a_OmpR			1	0	1	0	0.5
PSPPH_0997	PSPTO_1109	Psyr_0949	CN228_RS05460						0	0	0	0	0
PSPPH_0998	PSPTO_1110	Psyr_0950	CN228_RS05465						0	0	0	0	0
PSPPH_0999	PSPTO_1111	Psyr_0951	CN228_RS05470	PSPPH_3122					1	0	0	0	0.25
PSPPH_1000	PSPTO_1112	Psyr_0952	CN228_RS05475						0	0	0	0	0
PSPPH_1001	PSPTO_5636	Psyr_0953	CN228_RS05480	PSPPH_Irp,PSPPH_2193,PSPPH_4127	DC3000_Irp,DC3000_2193,DC3000_4127	B728a_4127	CN228_Irp,CN228_4127		3	3	1	2	2.25
PSPPH_1002	PSPTO_2587	Psyr_1292	CN228_RS13230			B728a_OmpR			0	0	1	0	0.25
PSPPH_1003	PSPTO_1114	Psyr_0954	CN228_RS05500						0	0	0	0	0
PSPPH_1004	PSPTO_1115	Psyr_0955	CN228_RS05505						0	0	0	0	0
PSPPH_1005	PSPTO_1116	Psyr_0956	CN228_RS05510		DC3000_2193				0	1	0	0	0.25
PSPPH_1006	PSPTO_1117	Psyr_0957	CN228_RS05515						0	0	0	0	0
PSPPH_1007	PSPTO_1118	Psyr_0958	CN228_RS05520		DC3000_Irp				0	1	0	0	0.25
PSPPH_1008	PSPTO_1119	Psyr_0959	CN228_RS05525	PSPPH_2193					1	0	0	0	0.25
PSPPH_1009	PSPTO_1120	Psyr_0960	CN228_RS05530		DC3000_2193				0	1	0	0	0.25
PSPPH_1010	PSPTO_1121	Psyr_0961	CN228_RS05535	PSPPH_4127					1	0	0	0	0.25
PSPPH_1011	PSPTO_1122	Psyr_0962	CN228_RS05540			B728a_OmpR			0	0	1	0	0.25
PSPPH_1012	PSPTO_1123	Psyr_0963	CN228_RS05545		DC3000_Irp,DC3000_2193,DC3000_4127	B728a_OmpR			0	3	1	0	1
PSPPH_1013	PSPTO_1125	Psyr_0964	CN228_RS05580						0	0	0	0	0
PSPPH_1014	PSPTO_1126	Psyr_0965	CN228_RS05585	PSPPH_OmpR	DC3000_2193	B728a_OmpR			1	1	1	0	0.75
PSPPH_1015	PSPTO_1127	Psyr_0966	CN228_RS05590						0	0	0	0	0
PSPPH_1016	PSPTO_1128	Psyr_0967	CN228_RS05595						0	0	0	0	0
PSPPH_1017	PSPTO_1129	Psyr_0968	CN228_RS25140						0	0	0	0	0
PSPPH_1018	PSPTO_1130	Psyr_0969	CN228_RS05620						0	0	0	0	0
PSPPH_1019	PSPTO_1131	Psyr_0970	CN228_RS05625						0	0	0	0	0
PSPPH_1020	PSPTO_1132	Psyr_0971	CN228_RS05630						0	0	0	0	0
PSPPH_1021	PSPTO_5634	Psyr_0972	CN228_RS05635						0	0	0	0	0
PSPPH_1022	PSPTO_1133	Psyr_0973	CN228_RS05640						0	0	0	0	0
PSPPH_1023	PSPTO_1134	Psyr_0974	CN228_RS05645	PSPPH_Irp,PSPPH_2193	DC3000_Irp,DC3000_2193	B728a_Irp			2	2	1	0	1.25
PSPPH_1024	PSPTO_1135	Psyr_0975	CN228_RS05650						0	0	0	0	0
PSPPH_1025	PSPTO_1136	Psyr_0976	CN228_RS05655						0	0	0	0	0
PSPPH_1026	PSPTO_2824	Psyr_0977	CN228_RS05665						0	0	0	0	0
PSPPH_1027	PSPTO_1138	Psyr_0978	CN228_RS05670						0	0	0	0	0
PSPPH_1028	PSPTO_3599	Psyr_3370	CN228_RS05675						0	0	0	0	0
PSPPH_1029	PSPTO_4097	Psyr_3136	CN228_RS05680		DC3000_Irp				0	1	0	0	0.25
PSPPH_1030	PSPTO_1139	Psyr_0979	CN228_RS05685						0	0	0	0	0
PSPPH_1031	PSPTO_1140	Psyr_0980	CN228_RS05690						0	0	0	0	0
PSPPH_1032	PSPTO_1141	Psyr_0981	CN228_RS05695						0	0	0	0	0
PSPPH_1033	PSPTO_1142	Psyr_0982	CN228_RS05700						0	0	0	0	0
PSPPH_1034	PSPTO_1143	Psyr_0983	CN228_RS05705						0	0	0	0	0
PSPPH_1035	PSPTO_1144	Psyr_0984	CN228_RS05710			B728a_4127			0	0	1	0	0.25
PSPPH_1036	PSPTO_1145	Psyr_0985	CN228_RS05715	PSPPH_OmpR	DC3000_Irp	B728a_Irp,B728a_OmpR			1	1	2	0	1
PSPPH_1037	PSPTO_1146	Psyr_0986	CN228_RS05720						0	0	0	0	0
PSPPH_1038	PSPTO_1147	Psyr_0989	CN228_RS05730						0	0	0	0	0
PSPPH_1039	PSPTO_1148	Psyr_0990	CN228_RS05735			B728a_OmpR			0	0	1	0	0.25
PSPPH_1040	PSPTO_1149	Psyr_0991	CN228_RS05740		DC3000_4127				0	1	0	0	0.25
PSPPH_1041	PSPTO_1150	Psyr_0992	CN228_RS05745		DC3000_Irp				0	1	0	0	0.25
PSPPH_1042									0	0	0	0	0
PSPPH_1043	PSPTO_1152	Psyr_0994	CN228_RS05760						0	0	0	0	0
PSPPH_1044	PSPTO_1153	Psyr_0995	CN228_RS05765						0	0	0	0	0
PSPPH_1045	PSPTO_1154	Psyr_0996	CN228_RS05770						0	0	0	0	0
PSPPH_1046	PSPTO_1155	Psyr_0997	CN228_RS05775						0	0	0	0	0
PSPPH_1047	PSPTO_1156	Psyr_0998	CN228_RS05780						0	0	0	0	0
PSPPH_1048	PSPTO_1157	Psyr_0999	CN228_RS13505		DC3000_Irp	B728a_Irp			0	1	1	0	0.5
PSPPH_1049	PSPTO_1158	Psyr_1000	CN228_RS05790						0	0	0	0	0
PSPPH_1050	PSPTO_1159	Psyr_1001	CN228_RS05795						0	0	0	0	0
PSPPH_1051	PSPTO_1160	Psyr_1002	CN228_RS06840		DC3000_Irp				0	1	0	0	0.25
PSPPH_1052	PSPTO_1161	Psyr_1003	CN228_RS05805						0	0	0	0	0
PSPPH_1053	PSPTO_2994	Psyr_1004	CN228_RS05810						0	0	0	0	0
PSPPH_1054	PSPTO_1164	Psyr_1005	CN228_RS05815						0	0	0	0	0
PSPPH_1055	PSPTO_1168	Psyr_1006	CN228_RS05820		DC3000_2193,DC3000_4127		CN228_4127		0	2	0	1	0.75
PSPPH_1056	PSPTO_1169	Psyr_1007	CN228_RS05825						0	0	0	0	0
PSPPH_1057	PSPTO_1170	Psyr_1008	CN228_RS05830		DC3000_Irp				0	1	0	0	0.25
PSPPH_1058	PSPTO_1171	Psyr_1009	CN228_RS05835						0	0	0	0	0
PSPPH_1059	PSPTO_1172	Psyr_1010	CN228_RS05840		DC3000_Irp		CN228_Irp		0	1	0	1	0.5
PSPPH_1060	PSPTO_1173	Psyr_1011	CN228_RS24790						0	0	0	0	0
PSPPH_1061	PSPTO_1174	Psyr_1012	CN228_RS05850	PSPPH_Irp,PSPPH_3122	DC3000_Irp,DC3000_2193				2	2	0	0	1
PSPPH_1062	PSPTO_3924	Psyr_2170	CN228_RS05855	PSPPH_4127	DC3000_Irp				1	1	0	0	0.5
PSPPH_1063	PSPTO_1175	Psyr_1568	CN228_RS05875	PSPPH_Irp,PSPPH_4127					2	0	0	0	0.5
PSPPH_1064	PSPTO_2135	Psyr_3887	CN228_RS22685						0	0	0	0	0
PSPPH_1065	PSPTO_1176	Psyr_1014	CN228_RS05880	PSPPH_Irp,PSPPH_4127	DC3000_Irp,DC3000_2193				2	2	0	0	1
PSPPH_1066	PSPTO_1177	Psyr_1015	CN228_RS05885	PSPPH_3122		B728a_3122			1	0	1	0	0.5
PSPPH_1067	PSPTO_1178	Psyr_1016	CN228_RS05890						0	0	0	0	0
PSPPH_1068	PSPTO_1179	Psyr_1017	CN228_RS05900						0	0	0	0	0
PSPPH_1069	PSPTO_1180	Psyr_1018	CN228_RS05905	PSPPH_2193					1	0	0	0	0.25
PSPPH_1070	PSPTO_1181	Psyr_1019	CN228_RS05910		DC3000_4127				0	1	0	0	0.25
PSPPH_1071	PSPTO_1182	Psyr_1020	CN228_RS05915	PSPPH_4127					1	0	0	0	0.25
PSPPH_1072	PSPTO_1183	Psyr_1021	CN228_RS05920		DC3000_Irp	B728a_OmpR			0	1	1	0	0.5
PSPPH_1073	PSPTO_1184	Psyr_1022	CN228_RS05925		DC3000_2193				0	1	0	0	0.25
PSPPH_1074	PSPTO_1185	Psyr_1023	CN228_RS05930		DC3000_2193				0	1	0	0	0.25
PSPPH_1075	PSPTO_1186	Psyr_1024	CN228_RS05935						0	0	0	0	0
PSPPH_1076	PSPTO_1187	Psyr_1025	CN228_RS05940	PSPPH_2193	DC3000_2193,DC3000_4127				1	2	0	0	0.75
PSPPH_1077	PSPTO_3597	Psyr_1026	CN228_RS05945	PSPPH_4127					1	0	0	0	0.25
PSPPH_1078	PSPTO_1191	Psyr_1027	CN228_RS05950	PSPPH_Irp					1	0	0	0	0.25
PSPPH_1079	PSPTO_1192	Psyr_1028	CN228_RS05955		DC3000_Irp				0	1	0	0	0.25
PSPPH_1080	PSPTO_1193	Psyr_1029	CN228_RS05960						0	0	0	0	0
PSPPH_1081	PSPTO_1194	Psyr_1030	CN228_RS05965		DC3000_Irp,DC3000_2193,DC3000_3122				0	3	0	0	0.75
PSPPH_1082	PSPTO_1195	Psyr_1031	CN228_RS05970						0	0	0	0	0
PSPPH_1083	PSPTO_1196	Psyr_1032	CN228_RS05975		DC3000_2193				0	1	0	0	0.25
PSPPH_1084	PSPTO_1197	Psyr_1033	CN228_RS05980						0	0	0	0	0
PSPPH_1085	PSPTO_1200	Psyr_1034	CN228_RS05995						0	0	0	0	0
PSPPH_1086	PSPTO_1201	Psyr_1035	CN228_RS06000						0	0	0	0	0
PSPPH_1087									0	0	0	0	0
PSPPH_1088	PSPTO_1139	Psyr_4971	CN228_RS02120						0	0	0	0	0
PSPPH_1089	PSPTO_1202	Psyr_1036	CN228_RS06005	PSPPH_2193	DC3000_2193,DC3000_4127				1	2	0	0	0.75
PSPPH_1090	PSPTO_1205	Psyr_1037	CN228_RS06020	PSPPH_OmpR	DC3000_2193,DC3000_3122				1	2	0	0	0.75
PSPPH_1091	PSPTO_1207	Psyr_1038	CN228_RS06035						0	0	0	0	0
PSPPH_1092	PSPTO_1208	Psyr_1039	CN228_RS06045						0	0	0	0	0
PSPPH_1093	PSPTO_1209	Psyr_1040	CN228_RS06050		DC3000_Irp,DC3000_2193				0	2	0	0	0.5
PSPPH_1094	PSPTO_1210	Psyr_4313	CN228_RS06055						0	0	0	0	0
PSPPH_1095									0	0	0	0	0
PSPPH_1096	PSPTO_1212	Psyr_3233	CN228_RS06065						0	0	0	0	0
PSPPH_1097	PSPTO_1213	Psyr_1041	CN228_RS06070	PSPPH_2193					1	0	0	0	0.25
PSPPH_1098	PSPTO_1214	Psyr_1042	CN228_RS06075						0	0	0	0	0
PSPPH_1099	PSPTO_1215	Psyr_1043	CN228_RS06100						0	0	0	0	0
PSPPH_1100	PSPTO_1216	Psyr_1044	CN228_RS06105		DC3000_Irp,DC3000_2193,DC3000_OmpR	B728a_OmpR			0	3	1	0	1
PSPPH_1101	PSPTO_1217	Psyr_1045	CN228_RS06110						0	0	0	0	0
PSPPH_1102	PSPTO_1218	Psyr_1046	CN228_RS06115	PSPPH_Irp			CN228_Irp,CN228_4127		1	0	0	2	0.75
PSPPH_1103	PSPTO_1219	Psyr_1047	CN228_RS06120						0	0	0	0	0
PSPPH_1104	PSPTO_1220	Psyr_1048	CN228_RS06125						0	0	0	0	0
PSPPH_1105	PSPTO_1223	Psyr_1049	CN228_RS06155	PSPPH_Irp					1	0	0	0	0.25
PSPPH_1106	PSPTO_1224	Psyr_1050	CN228_RS06160						0	0	0	0	0
PSPPH_1107	PSPTO_1232	Psyr_1052	CN228_RS06165		DC3000_Irp,DC3000_4127				0	2	0	0	0.5
PSPPH_1108	PSPTO_1233	Psyr_1053	CN228_RS06170						0	0	0	0	0
PSPPH_1109	PSPTO_1234	Psyr_1054	CN228_RS06175						0	0	0	0	0
PSPPH_1110	PSPTO_1235	Psyr_1055	CN228_RS06180						0	0	0	0	0
PSPPH_1111	PSPTO_1236	Psyr_1056	CN228_RS06185	PSPPH_2193,PSPPH_4127	DC3000_Irp				2	1	0	0	0.75
PSPPH_1112	PSPTO_1237	Psyr_1057	CN228_RS06190						0	0	0	0	0
PSPPH_1113	PSPTO_1238	Psyr_1058	CN228_RS06195	PSPPH_4127	DC3000_4127				1	1	0	0	0.5
PSPPH_1114	PSPTO_1239	Psyr_1059	CN228_RS06200	PSPPH_Irp	DC3000_2193	B728a_Irp			1	1	1	0	0.75
PSPPH_1115	PSPTO_1240	Psyr_1060	CN228_RS06205						0	0	0	0	0
PSPPH_1116	PSPTO_1241	Psyr_1061	CN228_RS06210		DC3000_Irp				0	1	0	0	0.25
PSPPH_1117	PSPTO_1242	Psyr_1062	CN228_RS06215						0	0	0	0	0
PSPPH_1118	PSPTO_1243	Psyr_1063	CN228_RS06220	PSPPH_Irp,PSPPH_OmpR	DC3000_2193				2	1	0	0	0.75
PSPPH_1119	PSPTO_1244	Psyr_1064	CN228_RS06225	PSPPH_Irp					1	0	0	0	0.25
PSPPH_1120	PSPTO_1245	Psyr_1065	CN228_RS06230						0	0	0	0	0
PSPPH_1121	PSPTO_1246	Psyr_1066	CN228_RS06235	PSPPH_OmpR	DC3000_Irp,DC3000_2193,DC3000_4127		CN228_Irp		1	3	0	1	1.25
PSPPH_1122	PSPTO_1247	Psyr_1067	CN228_RS06240	PSPPH_Irp	DC3000_2193				1	1	0	0	0.5
PSPPH_1123	PSPTO_1248	Psyr_1068	CN228_RS06245						0	0	0	0	0
PSPPH_1124	PSPTO_1249	Psyr_1069	CN228_RS06250						0	0	0	0	0
PSPPH_1125	PSPTO_1250	Psyr_4608	CN228_RS25090	PSPPH_Irp					1	0	0	0	0.25
PSPPH_1126	PSPTO_1251	Psyr_1812	CN228_RS24450		DC3000_Irp				0	1	0	0	0.25
PSPPH_1127	PSPTO_1252	Psyr_3235	CN228_RS08495						0	0	0	0	0
PSPPH_1128	PSPTO_1253	Psyr_1070	CN228_RS06255						0	0	0	0	0
PSPPH_1129	PSPTO_1254	Psyr_1071	CN228_RS06260	PSPPH_2193		B728a_OmpR			1	0	1	0	0.5
PSPPH_1130	PSPTO_1255	Psyr_1072	CN228_RS06265		DC3000_Irp		CN228_Irp		0	1	0	1	0.5
PSPPH_1131	PSPTO_1256	Psyr_1073	CN228_RS06270						0	0	0	0	0
PSPPH_1132	PSPTO_1257	Psyr_1074	CN228_RS06275						0	0	0	0	0
PSPPH_1133	PSPTO_1258	Psyr_1075	CN228_RS06280						0	0	0	0	0
PSPPH_1134	PSPTO_1260	Psyr_1076	CN228_RS06290						0	0	0	0	0
PSPPH_1135	PSPTO_4093	Psyr_1077	CN228_RS12515						0	0	0	0	0
PSPPH_1136	PSPTO_2508	Psyr_1078	CN228_RS01695						0	0	0	0	0
PSPPH_1137	PSPTO_1261	Psyr_1079	CN228_RS06295						0	0	0	0	0
PSPPH_1138	PSPTO_1262	Psyr_1080	CN228_RS06305						0	0	0	0	0
PSPPH_1139	PSPTO_1263	Psyr_1081	CN228_RS06310						0	0	0	0	0
PSPPH_1140	PSPTO_B0040	Psyr_1736	CN228_RS15965						0	0	0	0	0
PSPPH_1141	PSPTO_B0039	Psyr_0197	CN228_RS25855						0	0	0	0	0
PSPPH_1142	PSPTO_2864	Psyr_2037	CN228_RS21370	PSPPH_Irp	DC3000_4127				1	1	0	0	0.5
PSPPH_1143	PSPTO_0046	Psyr_4429	CN228_RS29865		DC3000_Irp				0	1	0	0	0.25
PSPPH_1144	PSPTO_5521	Psyr_5070	CN228_RS00525		DC3000_2193,DC3000_OmpR	B728a_OmpR			0	2	1	0	0.75
PSPPH_1145	PSPTO_1265	Psyr_1083	CN228_RS06320		DC3000_Irp,DC3000_2193	B728a_Irp	CN228_Irp		0	2	1	1	1
PSPPH_1146	PSPTO_4323	Psyr_1364	CN228_RS01935	PSPPH_Irp,PSPPH_2193,PSPPH_4127					3	0	0	0	0.75
PSPPH_1147									0	0	0	0	0
PSPPH_1148	PSPTO_4321	Psyr_4048	CN228_RS24765		DC3000_Irp,DC3000_2193				0	2	0	0	0.5
PSPPH_1149	PSPTO_3609	Psyr_4646	CN228_RS07495	PSPPH_OmpR					1	0	0	0	0.25
PSPPH_1150	PSPTO_1265	Psyr_1083	CN228_RS06320						0	0	0	0	0
PSPPH_1151	PSPTO_1266	Psyr_1084	CN228_RS06325						0	0	0	0	0
PSPPH_1152	PSPTO_1267	Psyr_1085	CN228_RS06340						0	0	0	0	0
PSPPH_1153	PSPTO_1268	Psyr_1086	CN228_RS06345	PSPPH_OmpR					1	0	0	0	0.25
PSPPH_1154	PSPTO_5194	Psyr_4871	CN228_RS29455						0	0	0	0	0
PSPPH_1155	PSPTO_1269	Psyr_1089	CN228_RS06355						0	0	0	0	0
PSPPH_1156	PSPTO_1270	Psyr_1090	CN228_RS06360						0	0	0	0	0
PSPPH_1157	PSPTO_1271	Psyr_1091	CN228_RS06365	PSPPH_Irp,PSPPH_OmpR	DC3000_Irp,DC3000_2193,DC3000_4127	B728a_OmpR			2	3	1	0	1.5
PSPPH_1158	PSPTO_1272	Psyr_1092	CN228_RS06370						0	0	0	0	0
PSPPH_1159	PSPTO_1273	Psyr_1093	CN228_RS06375		DC3000_Irp				0	1	0	0	0.25
PSPPH_1160	PSPTO_1274	Psyr_1094	CN228_RS06380	PSPPH_2193	DC3000_2193	B728a_OmpR			1	1	1	0	0.75
PSPPH_1161	PSPTO_1275	Psyr_1095	CN228_RS06385		DC3000_4127				0	1	0	0	0.25
PSPPH_1162	PSPTO_1276	Psyr_1096	CN228_RS06390						0	0	0	0	0
PSPPH_1163	PSPTO_1277	Psyr_1097	CN228_RS06395		DC3000_Irp,DC3000_4127				0	2	0	0	0.5
PSPPH_1164	PSPTO_5546	Psyr_0733	CN228_RS06400						0	0	0	0	0
PSPPH_1165	PSPTO_0287	Psyr_1072	CN228_RS06405						0	0	0	0	0
PSPPH_1166	PSPTO_1278	Psyr_1098	CN228_RS06450						0	0	0	0	0
PSPPH_1167	PSPTO_1278	Psyr_1099	CN228_RS06455	PSPPH_Irp					1	0	0	0	0.25
PSPPH_1168	PSPTO_2212	Psyr_1100	CN228_RS06460	PSPPH_Irp,PSPPH_2193,PSPPH_4127		B728a_4127			3	0	1	0	1
PSPPH_1169	PSPTO_1280	Psyr_1101	CN228_RS06465						0	0	0	0	0
PSPPH_1170	PSPTO_1281	Psyr_1102	CN228_RS06475						0	0	0	0	0
PSPPH_1171	PSPTO_1282	Psyr_1103	CN228_RS06480						0	0	0	0	0
PSPPH_1172	PSPTO_1283	Psyr_1104	CN228_RS06485						0	0	0	0	0
PSPPH_1173	PSPTO_1284	Psyr_1105	CN228_RS06490						0	0	0	0	0
PSPPH_1174	PSPTO_1285	Psyr_1106	CN228_RS06495						0	0	0	0	0
PSPPH_1175	PSPTO_1286	Psyr_1107	CN228_RS06500						0	0	0	0	0
PSPPH_1176	PSPTO_1287	Psyr_1108	CN228_RS06505	PSPPH_Irp	DC3000_Irp,DC3000_2193,DC3000_4127	B728a_Irp,B728a_4127,B728a_OmpR			1	3	3	0	1.75
PSPPH_1177	PSPTO_1288	Psyr_1109	CN228_RS06510						0	0	0	0	0
PSPPH_1178	PSPTO_1289	Psyr_1110	CN228_RS06515	PSPPH_4127	DC3000_4127				1	1	0	0	0.5
PSPPH_1179	PSPTO_1290	Psyr_1111	CN228_RS06520						0	0	0	0	0
PSPPH_1180	PSPTO_1291	Psyr_1112	CN228_RS06525						0	0	0	0	0
PSPPH_1181	PSPTO_1292	Psyr_1113	CN228_RS06530	PSPPH_2193	DC3000_2193	B728a_OmpR			1	1	1	0	0.75
PSPPH_1182	PSPTO_1293	Psyr_1114	CN228_RS06535						0	0	0	0	0
PSPPH_1183	PSPTO_1294	Psyr_1115	CN228_RS06540						0	0	0	0	0
PSPPH_1184	PSPTO_1295	Psyr_1116	CN228_RS06545		DC3000_2193				0	1	0	0	0.25
PSPPH_1185	PSPTO_1296	Psyr_1117	CN228_RS06550						0	0	0	0	0
PSPPH_1186	PSPTO_1298	Psyr_1118	CN228_RS06560						0	0	0	0	0
PSPPH_1187	PSPTO_1299	Psyr_1119	CN228_RS06565	PSPPH_Irp,PSPPH_2193,PSPPH_4127	DC3000_Irp,DC3000_2193	B728a_Irp	CN228_Irp		3	2	1	1	1.75
PSPPH_1188	PSPTO_1300	Psyr_1120	CN228_RS06570		DC3000_4127	B728a_4127			0	1	1	0	0.5
PSPPH_1189	PSPTO_1301	Psyr_1121	CN228_RS06575						0	0	0	0	0
PSPPH_1190	PSPTO_1302	Psyr_1122	CN228_RS06580						0	0	0	0	0
PSPPH_1191	PSPTO_1303	Psyr_1123	CN228_RS06585		DC3000_2193				0	1	0	0	0.25
PSPPH_1192	PSPTO_1304	Psyr_1124	CN228_RS06590						0	0	0	0	0
PSPPH_1193	PSPTO_1305	Psyr_1125	CN228_RS06595	PSPPH_Irp,PSPPH_2193,PSPPH_4127	DC3000_2193				3	1	0	0	1
PSPPH_1194	PSPTO_1306	Psyr_1126	CN228_RS06600						0	0	0	0	0
PSPPH_1195	PSPTO_1307	Psyr_1127	CN228_RS06605	PSPPH_2193					1	0	0	0	0.25
PSPPH_1196	PSPTO_1308	Psyr_1128	CN228_RS06610						0	0	0	0	0
PSPPH_1197	PSPTO_1309	Psyr_1129	CN228_RS06615	PSPPH_Irp					1	0	0	0	0.25
PSPPH_1198	PSPTO_1311	Psyr_1130	CN228_RS06620		DC3000_Irp				0	1	0	0	0.25
PSPPH_1199	PSPTO_1312	Psyr_1131	CN228_RS06625		DC3000_2193,DC3000_4127				0	2	0	0	0.5
PSPPH_1200	PSPTO_1313	Psyr_1132	CN228_RS06630						0	0	0	0	0
PSPPH_1201	PSPTO_4833	Psyr_1133	CN228_RS06635		DC3000_2193				0	1	0	0	0.25
PSPPH_1202									0	0	0	0	0
PSPPH_1203	PSPTO_1318	Psyr_1135	CN228_RS06645						0	0	0	0	0
PSPPH_1204	PSPTO_1319	Psyr_1136	CN228_RS06650						0	0	0	0	0
PSPPH_1205	PSPTO_1320	Psyr_1137	CN228_RS06655						0	0	0	0	0
PSPPH_1206	PSPTO_1322	Psyr_1138	CN228_RS06665						0	0	0	0	0
PSPPH_1207	PSPTO_1323	Psyr_1139	CN228_RS06670						0	0	0	0	0
PSPPH_1208	PSPTO_1349	Psyr_4730	CN228_RS02260						0	0	0	0	0
PSPPH_1209	PSPTO_1324	Psyr_1140	CN228_RS06675						0	0	0	0	0
PSPPH_1210	PSPTO_1325	Psyr_1141	CN228_RS06690		DC3000_2193				0	1	0	0	0.25
PSPPH_1211	PSPTO_1326	Psyr_1142	CN228_RS06695	PSPPH_2193			CN228_4127		1	0	0	1	0.5
PSPPH_1212	PSPTO_1327	Psyr_1143	CN228_RS06700	PSPPH_OmpR					1	0	0	0	0.25
PSPPH_1213	PSPTO_1328	Psyr_1144	CN228_RS06705		DC3000_2193,DC3000_4127				0	2	0	0	0.5
PSPPH_1214	PSPTO_1329	Psyr_1145	CN228_RS06710	PSPPH_OmpR	DC3000_2193				1	1	0	0	0.5
PSPPH_1215	PSPTO_2701	Psyr_5040	CN228_RS15770	PSPPH_OmpR		B728a_OmpR			1	0	1	0	0.5
PSPPH_1216	PSPTO_1330	Psyr_1146	CN228_RS06715		DC3000_Irp,DC3000_4127				0	2	0	0	0.5
PSPPH_1217	PSPTO_1734	Psyr_3658	CN228_RS01300						0	0	0	0	0
PSPPH_1218	PSPTO_1332	Psyr_1148	CN228_RS06725			B728a_OmpR			0	0	1	0	0.25
PSPPH_1219	PSPTO_1333	Psyr_1149	CN228_RS06730						0	0	0	0	0
PSPPH_1220	PSPTO_1334	Psyr_1150	CN228_RS06735		DC3000_4127				0	1	0	0	0.25
PSPPH_1221	PSPTO_1335	Psyr_1151	CN228_RS06740						0	0	0	0	0
PSPPH_1222	PSPTO_1336	Psyr_1152	CN228_RS06745			B728a_OmpR			0	0	1	0	0.25
PSPPH_1223	PSPTO_1337	Psyr_1153	CN228_RS06750						0	0	0	0	0
PSPPH_1224	PSPTO_1338	Psyr_1154	CN228_RS06755						0	0	0	0	0
PSPPH_1225	PSPTO_0501	Psyr_2536	CN228_RS00880	PSPPH_2193	DC3000_4127				1	1	0	0	0.5
PSPPH_1226	PSPTO_1343	Psyr_1156	CN228_RS06785						0	0	0	0	0
PSPPH_1227	PSPTO_1344	Psyr_0765	CN228_RS03475						0	0	0	0	0
PSPPH_1228									0	0	0	0	0
PSPPH_1229	PSPTO_1346	Psyr_1157	CN228_RS06800	PSPPH_3122		B728a_OmpR			1	0	1	0	0.5
PSPPH_1230	PSPTO_5349	Psyr_0966	CN228_RS06810	PSPPH_OmpR	DC3000_2193				1	1	0	0	0.5
PSPPH_1231	PSPTO_1350	Psyr_0500	CN228_RS05770						0	0	0	0	0
PSPPH_1232	PSPTO_1351	Psyr_4313	CN228_RS06815		DC3000_Irp,DC3000_4127				0	2	0	0	0.5
PSPPH_1233	PSPTO_1352	Psyr_1161	CN228_RS06825						0	0	0	0	0
PSPPH_1234	PSPTO_1353	Psyr_1162	CN228_RS06830						0	0	0	0	0
PSPPH_1235	PSPTO_1354	Psyr_1163	CN228_RS06835	PSPPH_Irp		B728a_Irp	CN228_Irp		1	0	1	1	0.75
PSPPH_1236									0	0	0	0	0
PSPPH_1237	PSPTO_1356	Psyr_1165	CN228_RS06845		DC3000_4127				0	1	0	0	0.25
PSPPH_1238									0	0	0	0	0
PSPPH_1239	PSPTO_1358	Psyr_1167	CN228_RS06855						0	0	0	0	0
PSPPH_1240	PSPTO_1359	Psyr_1168	CN228_RS06860						0	0	0	0	0
PSPPH_1241									0	0	0	0	0
PSPPH_1242	PSPTO_1361	Psyr_1170	CN228_RS06870		DC3000_2193				0	1	0	0	0.25
PSPPH_1243	PSPTO_1362	Psyr_1171	CN228_RS06875						0	0	0	0	0
PSPPH_1244	PSPTO_4793	Psyr_1172	CN228_RS05100	PSPPH_Irp	DC3000_2193	B728a_Irp	CN228_Irp		1	1	1	1	1
PSPPH_1245	PSPTO_4362	Psyr_1173	CN228_RS24810						0	0	0	0	0
PSPPH_1246	PSPTO_1363	Psyr_1174	CN228_RS06880	PSPPH_Irp,PSPPH_2193					2	0	0	0	0.5
PSPPH_1247	PSPTO_0402	Psyr_5021	CN228_RS07365						0	0	0	0	0
PSPPH_1248	PSPTO_1364	Psyr_3493	CN228_RS06885						0	0	0	0	0
PSPPH_1249	PSPTO_1365	Psyr_1175	CN228_RS06890		DC3000_Irp				0	1	0	0	0.25
PSPPH_1250	PSPTO_1366	Psyr_1178	CN228_RS06895						0	0	0	0	0
PSPPH_1251	PSPTO_0148	Psyr_1179	CN228_RS06345						0	0	0	0	0
PSPPH_1252	PSPTO_3004	Psyr_1180	CN228_RS14480				CN228_Irp		0	0	0	1	0.25
PSPPH_1253	PSPTO_1368	Psyr_1181	CN228_RS06905		DC3000_Irp,DC3000_2193				0	2	0	0	0.5
PSPPH_1254	PSPTO_4843	Psyr_4383	CN228_RS04825				CN228_Irp		0	0	0	1	0.25
PSPPH_1255	PSPTO_0272	Psyr_0604	CN228_RS19600		DC3000_Irp,DC3000_2193				0	2	0	0	0.5
PSPPH_1256	PSPTO_5005	Psyr_0518	CN228_RS28355						0	0	0	0	0
PSPPH_1257	PSPTO_1906	Psyr_3501	CN228_RS21970		DC3000_Irp				0	1	0	0	0.25
PSPPH_1258	PSPTO_3832	Psyr_1647	CN228_RS10600	PSPPH_2193					1	0	0	0	0.25
PSPPH_1259	PSPTO_4920	Psyr_0596	CN228_RS27770						0	0	0	0	0
PSPPH_1260	PSPTO_2396	Psyr_0123	CN228_RS17830						0	0	0	0	0
PSPPH_1261	PSPTO_3584	Psyr_3355	CN228_RS12405		DC3000_Irp				0	1	0	0	0.25
PSPPH_1262									0	0	0	0	0
PSPPH_1263									0	0	0	0	0
PSPPH_1264	PSPTO_1373	Psyr_1184	CN228_RS06935						0	0	0	0	0
PSPPH_1265	PSPTO_1374	Psyr_1185	CN228_RS19565			B728a_OmpR			0	0	1	0	0.25
PSPPH_1266									0	0	0	0	0
PSPPH_1267	PSPTO_1376	Psyr_1187	CN228_RS06950	PSPPH_Irp					1	0	0	0	0.25
PSPPH_1268	PSPTO_1377	Psyr_1188	CN228_RS06955	PSPPH_Irp	DC3000_2193				1	1	0	0	0.5
PSPPH_1269	PSPTO_1378	Psyr_1189	CN228_RS06960						0	0	0	0	0
PSPPH_1270	PSPTO_1379	Psyr_1190	CN228_RS06965		DC3000_2193,DC3000_4127,DC3000_OmpR	B728a_2193,B728a_3122,B728a_4127,B728a_OmpR	CN228_Irp		0	3	4	1	2
PSPPH_1271	PSPTO_1380	Psyr_1191	CN228_RS06970						0	0	0	0	0
PSPPH_1272	PSPTO_1187	Psyr_1192	CN228_RS30355						0	0	0	0	0
PSPPH_1273	PSPTO_1382	Psyr_1193	CN228_RS06980		DC3000_OmpR				0	1	0	0	0.25
PSPPH_1274	PSPTO_1383	Psyr_1194	CN228_RS06985						0	0	0	0	0
PSPPH_1275	PSPTO_1384	Psyr_1195	CN228_RS06990						0	0	0	0	0
PSPPH_1276	PSPTO_1385	Psyr_1196	CN228_RS06995						0	0	0	0	0
PSPPH_1277	PSPTO_1386	Psyr_1197	CN228_RS07000						0	0	0	0	0
PSPPH_1278	PSPTO_4812	Psyr_1198	CN228_RS21220						0	0	0	0	0
PSPPH_1279	PSPTO_1388	Psyr_1199	CN228_RS07010						0	0	0	0	0
PSPPH_1280	PSPTO_1389	Psyr_1200	CN228_RS07015						0	0	0	0	0
PSPPH_1281	PSPTO_1391	Psyr_1202	CN228_RS07025						0	0	0	0	0
PSPPH_1282	PSPTO_1392	Psyr_1205	CN228_RS07045						0	0	0	0	0
PSPPH_1283	PSPTO_1393	Psyr_1206	CN228_RS07050						0	0	0	0	0
PSPPH_1284	PSPTO_1394	Psyr_1207	CN228_RS07055						0	0	0	0	0
PSPPH_1285	PSPTO_1395	Psyr_1208	CN228_RS07060						0	0	0	0	0
PSPPH_1286	PSPTO_1396	Psyr_1209	CN228_RS07065						0	0	0	0	0
PSPPH_1287	PSPTO_1397	Psyr_1210	CN228_RS07070						0	0	0	0	0
PSPPH_1288	PSPTO_1398	Psyr_1211	CN228_RS07075						0	0	0	0	0
PSPPH_1289	PSPTO_1399	Psyr_1212	CN228_RS07080						0	0	0	0	0
PSPPH_1290	PSPTO_1400	Psyr_1213	CN228_RS07085						0	0	0	0	0
PSPPH_1291	PSPTO_1401	Psyr_1214	CN228_RS07090						0	0	0	0	0
PSPPH_1292	PSPTO_1402	Psyr_1215	CN228_RS07095						0	0	0	0	0
PSPPH_1293	PSPTO_1403	Psyr_1216	CN228_RS07100	PSPPH_2193		B728a_OmpR			1	0	1	0	0.5
PSPPH_1294	PSPTO_1404	Psyr_1217	CN228_RS07105						0	0	0	0	0
PSPPH_1295	PSPTO_1405	Psyr_1218	CN228_RS07110						0	0	0	0	0
PSPPH_1296	PSPTOA0012	Psyr_1220	CN228_RS09050						0	0	0	0	0
PSPPH_1297	PSPTO_1410	Psyr_2048	CN228_RS18180	PSPPH_Irp	DC3000_Irp,DC3000_2193				1	2	0	0	0.75
PSPPH_1298									0	0	0	0	0
PSPPH_1299	PSPTO_1412	Psyr_1227	CN228_RS07145						0	0	0	0	0
PSPPH_1300	PSPTO_1413	Psyr_1228	CN228_RS07150			B728a_4127			0	0	1	0	0.25
PSPPH_1301	PSPTO_1414	Psyr_1229	CN228_RS07155		DC3000_2193				0	1	0	0	0.25
PSPPH_1302	PSPTO_1415	Psyr_1230	CN228_RS07160						0	0	0	0	0
PSPPH_1303	PSPTO_1416	Psyr_1231	CN228_RS07165						0	0	0	0	0
PSPPH_1304	PSPTO_1417	Psyr_1232	CN228_RS07170						0	0	0	0	0
PSPPH_1305	PSPTO_1419	Psyr_1233	CN228_RS07175		DC3000_Irp				0	1	0	0	0.25
PSPPH_1306	PSPTO_1420	Psyr_1234	CN228_RS07180						0	0	0	0	0
PSPPH_1307	PSPTO_1421	Psyr_1235	CN228_RS07185						0	0	0	0	0
PSPPH_1308	PSPTO_1422	Psyr_1236	CN228_RS07195	PSPPH_OmpR	DC3000_Irp				1	1	0	0	0.5
PSPPH_1309	PSPTO_1423	Psyr_1237	CN228_RS07200						0	0	0	0	0
PSPPH_1310	PSPTO_1424	Psyr_1238	CN228_RS07205						0	0	0	0	0
PSPPH_1311	PSPTO_1425	Psyr_1239	CN228_RS07210			B728a_Irp			0	0	1	0	0.25
PSPPH_1312	PSPTO_1426	Psyr_1240	CN228_RS07215						0	0	0	0	0
PSPPH_1313	PSPTO_1427	Psyr_1241	CN228_RS07220						0	0	0	0	0
PSPPH_1314	PSPTO_1428	Psyr_1242	CN228_RS07225	PSPPH_2193					1	0	0	0	0.25
PSPPH_1315	PSPTO_1429	Psyr_1243	CN228_RS07230						0	0	0	0	0
PSPPH_1316	PSPTO_1430	Psyr_1244	CN228_RS07235		DC3000_2193				0	1	0	0	0.25
PSPPH_1317	PSPTO_1431	Psyr_1245	CN228_RS07240						0	0	0	0	0
PSPPH_1318	PSPTO_1432	Psyr_1246	CN228_RS07245	PSPPH_2193		B728a_4127			1	0	1	0	0.5
PSPPH_1319	PSPTO_1433	Psyr_1247	CN228_RS07250	PSPPH_Irp,PSPPH_2193	DC3000_Irp,DC3000_2193				2	2	0	0	1
PSPPH_1320	PSPTO_1434	Psyr_1248	CN228_RS07255						0	0	0	0	0
PSPPH_1321	PSPTO_1435	Psyr_1249	CN228_RS07260	PSPPH_4127	DC3000_4127				1	1	0	0	0.5
PSPPH_1322	PSPTO_1436	Psyr_1250	CN228_RS07265	PSPPH_3122					1	0	0	0	0.25
PSPPH_1323	PSPTO_1437	Psyr_1251	CN228_RS07270						0	0	0	0	0
PSPPH_1324	PSPTO_1438	Psyr_1252	CN228_RS07275						0	0	0	0	0
PSPPH_1325	PSPTO_1440	Psyr_1253	CN228_RS07280				CN228_Irp		0	0	0	1	0.25
PSPPH_1326	PSPTO_1441	Psyr_1254	CN228_RS07285						0	0	0	0	0
PSPPH_1327	PSPTO_5635	Psyr_2624	CN228_RS07290	PSPPH_2193					1	0	0	0	0.25
PSPPH_1328	PSPTO_1443	Psyr_1256	CN228_RS07295	PSPPH_2193	DC3000_Irp,DC3000_2193				1	2	0	0	0.75
PSPPH_1329	PSPTO_1444	Psyr_1257	CN228_RS07300	PSPPH_Irp	DC3000_Irp,DC3000_2193,DC3000_4127	B728a_Irp	CN228_Irp		1	3	1	1	1.5
PSPPH_1330	PSPTO_1445	Psyr_1258	CN228_RS07310						0	0	0	0	0
PSPPH_1331	PSPTO_1446	Psyr_1259	CN228_RS07315						0	0	0	0	0
PSPPH_1332	PSPTO_1448	Psyr_1260	CN228_RS07325						0	0	0	0	0
PSPPH_1333	PSPTO_1449	Psyr_1261	CN228_RS07330	PSPPH_2193	DC3000_Irp				1	1	0	0	0.5
PSPPH_1334	PSPTO_1450	Psyr_1262	CN228_RS07335						0	0	0	0	0
PSPPH_1335	PSPTO_1455	Psyr_0402	CN228_RS07350	PSPPH_Irp	DC3000_Irp,DC3000_4127		CN228_Irp		1	2	0	1	1
PSPPH_1336	PSPTO_2135	Psyr_3887	CN228_RS22685						0	0	0	0	0
PSPPH_1337	PSPTO_2695	Psyr_1265	CN228_RS07375						0	0	0	0	0
PSPPH_1338	PSPTO_1456	Psyr_1266	CN228_RS07385		DC3000_Irp,DC3000_4127				0	2	0	0	0.5
PSPPH_1339	PSPTO_1457	Psyr_1267	CN228_RS07390						0	0	0	0	0
PSPPH_1340	PSPTO_1458	Psyr_1268	CN228_RS07395	PSPPH_4127	DC3000_Irp				1	1	0	0	0.5
PSPPH_1341	PSPTO_1459	Psyr_1269	CN228_RS07400		DC3000_OmpR	B728a_OmpR			0	1	1	0	0.5
PSPPH_1342	PSPTO_1460	Psyr_1270	CN228_RS07405						0	0	0	0	0
PSPPH_1343	PSPTO_1461	Psyr_1271	CN228_RS07410	PSPPH_2193					1	0	0	0	0.25
PSPPH_1344	PSPTO_1462	Psyr_1272	CN228_RS07415						0	0	0	0	0
PSPPH_1345	PSPTO_1464	Psyr_1273	CN228_RS07425						0	0	0	0	0
PSPPH_1346	PSPTO_1465	Psyr_1274	CN228_RS07430						0	0	0	0	0
PSPPH_1347	PSPTO_1466	Psyr_1275	CN228_RS07435						0	0	0	0	0
PSPPH_1348	PSPTO_1467	Psyr_1276	CN228_RS07445						0	0	0	0	0
PSPPH_1349	PSPTO_1468	Psyr_1277	CN228_RS07450						0	0	0	0	0
PSPPH_1350	PSPTO_1469	Psyr_1278	CN228_RS07455	PSPPH_4127	DC3000_2193				1	1	0	0	0.5
PSPPH_1351	PSPTO_1470	Psyr_1279	CN228_RS07460						0	0	0	0	0
PSPPH_1352	PSPTO_1471	Psyr_1280	CN228_RS07465						0	0	0	0	0
PSPPH_1353	PSPTO_1472	Psyr_1281	CN228_RS07470	PSPPH_OmpR					1	0	0	0	0.25
PSPPH_1354	PSPTO_1473	Psyr_1282	CN228_RS07475		DC3000_2193	B728a_4127			0	1	1	0	0.5
PSPPH_1355	PSPTO_1474	Psyr_1283	CN228_RS07480			B728a_Irp,B728a_3122			0	0	2	0	0.5
PSPPH_1356	PSPTO_1475	Psyr_1284	CN228_RS07485		DC3000_2193				0	1	0	0	0.25
PSPPH_1357	PSPTO_1476	Psyr_1285	CN228_RS07490	PSPPH_OmpR	DC3000_2193	B728a_Irp,B728a_2193			1	1	2	0	1
PSPPH_1358	PSPTO_1478	Psyr_1286	CN228_RS07495						0	0	0	0	0
PSPPH_1359	PSPTO_1479	Psyr_1289	CN228_RS07505						0	0	0	0	0
PSPPH_1360	PSPTO_1480	Psyr_1290	CN228_RS07510	PSPPH_Irp	DC3000_4127	B728a_4127			1	1	1	0	0.75
PSPPH_1361	PSPTO_1481	Psyr_1291	CN228_RS07515						0	0	0	0	0
PSPPH_1362									0	0	0	0	0
PSPPH_1363	PSPTO_1483	Psyr_1293	CN228_RS07530		DC3000_2193				0	1	0	0	0.25
PSPPH_1364	PSPTO_1484	Psyr_1294	CN228_RS07535						0	0	0	0	0
PSPPH_1365	PSPTO_2135	Psyr_3887	CN228_RS22685						0	0	0	0	0
PSPPH_1366	PSPTO_1485	Psyr_1295	CN228_RS07540						0	0	0	0	0
PSPPH_1367	PSPTO_1486	Psyr_1296	CN228_RS07545	PSPPH_2193					1	0	0	0	0.25
PSPPH_1368	PSPTO_1487	Psyr_1297	CN228_RS07550						0	0	0	0	0
PSPPH_1369	PSPTO_1488	Psyr_1298	CN228_RS07555						0	0	0	0	0
PSPPH_1370	PSPTO_1489	Psyr_1299	CN228_RS07560						0	0	0	0	0
PSPPH_1371	PSPTO_1490	Psyr_1300	CN228_RS07565						0	0	0	0	0
PSPPH_1372	PSPTO_4735	Psyr_1970	CN228_RS08410						0	0	0	0	0
PSPPH_1373	PSPTO_4954	Psyr_0560	CN228_RS28120	PSPPH_Irp					1	0	0	0	0.25
PSPPH_1374	PSPTO_4151	Psyr_3890	CN228_RS20455		DC3000_Irp,DC3000_2193				0	2	0	0	0.5
PSPPH_1375	PSPTO_2580	Psyr_3889	CN228_RS05965	PSPPH_Irp					1	0	0	0	0.25
PSPPH_1376	PSPTO_4149	Psyr_3888	CN228_RS23800						0	0	0	0	0
PSPPH_1377	PSPTO_4148	Psyr_3887	CN228_RS23795	PSPPH_4127	DC3000_4127				1	1	0	0	0.5
PSPPH_1378	PSPTO_4147	Psyr_3886	CN228_RS23790						0	0	0	0	0
PSPPH_1379	PSPTO_4146	Psyr_3885	CN228_RS23785						0	0	0	0	0
PSPPH_1380	PSPTO_4145	Psyr_3884	CN228_RS23780				CN228_OmpR		0	0	0	1	0.25
PSPPH_1381	PSPTO_4144	Psyr_3883	CN228_RS23775		DC3000_Irp,DC3000_2193				0	2	0	0	0.5
PSPPH_1382	PSPTO_4142	Psyr_3881	CN228_RS23765		DC3000_Irp				0	1	0	0	0.25
PSPPH_1383	PSPTO_4141	Psyr_3880	CN228_RS23760						0	0	0	0	0
PSPPH_1384	PSPTO_4140	Psyr_3878	CN228_RS23745						0	0	0	0	0
PSPPH_1385	PSPTO_4139	Psyr_3877	CN228_RS23740						0	0	0	0	0
PSPPH_1386	PSPTO_4138	Psyr_3876	CN228_RS23735						0	0	0	0	0
PSPPH_1387	PSPTO_4137	Psyr_3875	CN228_RS23730	PSPPH_Irp,PSPPH_2193	DC3000_Irp				2	1	0	0	0.75
PSPPH_1388	PSPTO_4136	Psyr_3874	CN228_RS23725		DC3000_Irp				0	1	0	0	0.25
PSPPH_1389	PSPTO_4135	Psyr_3873	CN228_RS23720						0	0	0	0	0
PSPPH_1390	PSPTO_4134	Psyr_3872	CN228_RS23715						0	0	0	0	0
PSPPH_1391	PSPTO_4133	Psyr_3871	CN228_RS23710						0	0	0	0	0
PSPPH_1392	PSPTO_4127	Psyr_3870	CN228_RS23705						0	0	0	0	0
PSPPH_1393	PSPTO_4132	Psyr_3869	CN228_RS23700						0	0	0	0	0
PSPPH_1394	PSPTO_4131	Psyr_3868	CN228_RS23695		DC3000_2193				0	1	0	0	0.25
PSPPH_1395	PSPTO_0686	Psyr_3867	CN228_RS23690						0	0	0	0	0
PSPPH_1396	PSPTO_4130	Psyr_3866	CN228_RS23685						0	0	0	0	0
PSPPH_1397	PSPTO_4129	Psyr_3865	CN228_RS23680						0	0	0	0	0
PSPPH_1398									0	0	0	0	0
PSPPH_1399	PSPTO_4127	Psyr_3863	CN228_RS23665						0	0	0	0	0
PSPPH_1400	PSPTO_4126	Psyr_3862	CN228_RS23660						0	0	0	0	0
PSPPH_1401	PSPTO_4125	Psyr_3861	CN228_RS23655			B728a_OmpR			0	0	1	0	0.25
PSPPH_1402	PSPTO_4124	Psyr_3860	CN228_RS23650						0	0	0	0	0
PSPPH_1403	PSPTO_4123	Psyr_3859	CN228_RS23645						0	0	0	0	0
PSPPH_1404	PSPTO_4122	Psyr_3858	CN228_RS23640						0	0	0	0	0
PSPPH_1405	PSPTO_4121	Psyr_3857	CN228_RS23635						0	0	0	0	0
PSPPH_1406	PSPTO_4120	Psyr_3856	CN228_RS23630						0	0	0	0	0
PSPPH_1407	PSPTO_4119	Psyr_3855	CN228_RS23625						0	0	0	0	0
PSPPH_1408	PSPTO_4117	Psyr_3854	CN228_RS23615						0	0	0	0	0
PSPPH_1409	PSPTO_4116	Psyr_3853	CN228_RS23610	PSPPH_Irp					1	0	0	0	0.25
PSPPH_1410	PSPTO_4115	Psyr_3852	CN228_RS23605						0	0	0	0	0
PSPPH_1411	PSPTO_4114	Psyr_3851	CN228_RS23590		DC3000_4127				0	1	0	0	0.25
PSPPH_1412	PSPTO_4113	Psyr_3850	CN228_RS23585	PSPPH_2193					1	0	0	0	0.25
PSPPH_1413	PSPTO_4112	Psyr_3849	CN228_RS23580						0	0	0	0	0
PSPPH_1414	PSPTO_4111	Psyr_3848	CN228_RS23575						0	0	0	0	0
PSPPH_1415	PSPTO_4110	Psyr_3847	CN228_RS23570						0	0	0	0	0
PSPPH_1416	PSPTO_4109	Psyr_3846	CN228_RS23565						0	0	0	0	0
PSPPH_1417	PSPTO_4108	Psyr_3845	CN228_RS23560	PSPPH_Irp					1	0	0	0	0.25
PSPPH_1418	PSPTO_4107	Psyr_3844	CN228_RS23550						0	0	0	0	0
PSPPH_1419	PSPTO_4106	Psyr_3843	CN228_RS23545	PSPPH_2193					1	0	0	0	0.25
PSPPH_1420	PSPTO_4105	Psyr_1990	CN228_RS23540		DC3000_2193				0	1	0	0	0.25
PSPPH_1421	PSPTO_4104	Psyr_3842	CN228_RS23515	PSPPH_Irp					1	0	0	0	0.25
PSPPH_1422	PSPTO_4103	Psyr_3841	CN228_RS23510		DC3000_Irp	B728a_Irp	CN228_Irp		0	1	1	1	0.75
PSPPH_1423	PSPTO_0377	Psyr_3840	CN228_RS02145						0	0	0	0	0
PSPPH_1424	PSPTO_4101	Psyr_3839	CN228_RS23500	PSPPH_Irp,PSPPH_2193					2	0	0	0	0.5
PSPPH_1425	PSPTO_4100	Psyr_3838	CN228_RS23495	PSPPH_2193					1	0	0	0	0.25
PSPPH_1426	PSPTO_4098	Psyr_3836	CN228_RS23485						0	0	0	0	0
PSPPH_1427	PSPTO_4097	Psyr_3834	CN228_RS23480	PSPPH_Irp					1	0	0	0	0.25
PSPPH_1428	PSPTO_4095	Psyr_3831	CN228_RS23465						0	0	0	0	0
PSPPH_1429	PSPTO_4094	Psyr_3830	CN228_RS23460						0	0	0	0	0
PSPPH_1430	PSPTO_4093	Psyr_3829	CN228_RS27555				CN228_Irp		0	0	0	1	0.25
PSPPH_1431	PSPTO_4092	Psyr_3828	CN228_RS23455	PSPPH_Irp,PSPPH_2193	DC3000_2193				2	1	0	0	0.75
PSPPH_1432	PSPTO_4091	Psyr_3827	CN228_RS23445						0	0	0	0	0
PSPPH_1433	PSPTO_4090	Psyr_3826	CN228_RS23440						0	0	0	0	0
PSPPH_1434	PSPTO_4089	Psyr_4478	CN228_RS23435						0	0	0	0	0
PSPPH_1435	PSPTO_2626	Psyr_3825	CN228_RS23430						0	0	0	0	0
PSPPH_1436	PSPTO_4087	Psyr_3824	CN228_RS23425						0	0	0	0	0
PSPPH_1437	PSPTO_1067	Psyr_4291	CN228_RS31070		DC3000_2193				0	1	0	0	0.25
PSPPH_1438	PSPTO_4084	Psyr_3823	CN228_RS23415		DC3000_2193				0	1	0	0	0.25
PSPPH_1439	PSPTO_4083	Psyr_3822	CN228_RS23410		DC3000_4127				0	1	0	0	0.25
PSPPH_1440	PSPTO_4082	Psyr_3821	CN228_RS23405		DC3000_Irp				0	1	0	0	0.25
PSPPH_1441	PSPTO_3096	Psyr_3820	CN228_RS23400	PSPPH_2193	DC3000_2193				1	1	0	0	0.5
PSPPH_1442	PSPTO_2135	Psyr_1372	CN228_RS22685						0	0	0	0	0
PSPPH_1443	PSPTO_1568	Psyr_3813	CN228_RS03865		DC3000_2193		CN228_Irp		0	1	0	1	0.5
PSPPH_1444	PSPTO_4695	Psyr_4607	CN228_RS13095	PSPPH_2193					1	0	0	0	0.25
PSPPH_1445	PSPTO_5087	Psyr_0857	CN228_RS27235						0	0	0	0	0
PSPPH_1446	PSPTO_3734	Psyr_0074	CN228_RS17870						0	0	0	0	0
PSPPH_1447									0	0	0	0	0
PSPPH_1448	PSPTO_4070	Psyr_3818	CN228_RS01470	PSPPH_Irp,PSPPH_3122,PSPPH_4127	DC3000_2193	B728a_Irp			3	1	1	0	1.25
PSPPH_1449	PSPTO_4071	Psyr_3819	CN228_RS32820						0	0	0	0	0
PSPPH_1450	PSPTO_4081	Psyr_4986	CN228_RS17795	PSPPH_Irp,PSPPH_OmpR	DC3000_4127				2	1	0	0	0.75
PSPPH_1451	PSPTO_4081	Psyr_4986	CN228_RS00880						0	0	0	0	0
PSPPH_1452	PSPTO_1243	Psyr_2490	CN228_RS15445			B728a_4127			0	0	1	0	0.25
PSPPH_1453	PSPTO_5438	Psyr_4988	CN228_RS00880						0	0	0	0	0
PSPPH_1454	PSPTO_5414	Psyr_0340	CN228_RS29460	PSPPH_OmpR	DC3000_Irp,DC3000_2193				1	2	0	0	0.75
PSPPH_1455	PSPTO_1582	Psyr_4922	CN228_RS19025						0	0	0	0	0
PSPPH_1456	PSPTO_1583	Psyr_0060	CN228_RS32160		DC3000_4127				0	1	0	0	0.25
PSPPH_1457	PSPTO_1584	Psyr_3792	CN228_RS09715						0	0	0	0	0
PSPPH_1458	PSPTO_5394	Psyr_3795	CN228_RS09700						0	0	0	0	0
PSPPH_1459	PSPTO_1542	Psyr_3794	CN228_RS09705		DC3000_Irp,DC3000_2193,DC3000_4127				0	3	0	0	0.75
PSPPH_1460	PSPTO_1806	Psyr_3793	CN228_RS09710						0	0	0	0	0
PSPPH_1461	PSPTO_0335	Psyr_3792	CN228_RS09715						0	0	0	0	0
PSPPH_1462	PSPTO_1587	Psyr_3791	CN228_RS09725						0	0	0	0	0
PSPPH_1463	PSPTO_1588	Psyr_3790	CN228_RS09730						0	0	0	0	0
PSPPH_1464	PSPTO_1589	Psyr_3789	CN228_RS09735						0	0	0	0	0
PSPPH_1465	PSPTO_1590	Psyr_3788	CN228_RS09740						0	0	0	0	0
PSPPH_1466	PSPTO_1592	Psyr_3787	CN228_RS09750		DC3000_2193				0	1	0	0	0.25
PSPPH_1467	PSPTO_1278	Psyr_2836	CN228_RS09755						0	0	0	0	0
PSPPH_1468	PSPTO_1593	Psyr_3786	CN228_RS09760	PSPPH_Irp	DC3000_4127				1	1	0	0	0.5
PSPPH_1469	PSPTO_1594	Psyr_3784	CN228_RS09780						0	0	0	0	0
PSPPH_1470	PSPTO_3439	Psyr_3783	CN228_RS09785						0	0	0	0	0
PSPPH_1471	PSPTO_1596	Psyr_3782	CN228_RS09795						0	0	0	0	0
PSPPH_1472	PSPTO_1597	Psyr_3781	CN228_RS09800						0	0	0	0	0
PSPPH_1473	PSPTO_1598	Psyr_3780	CN228_RS09805						0	0	0	0	0
PSPPH_1474	PSPTO_1599	Psyr_3779	CN228_RS09810						0	0	0	0	0
PSPPH_1475	PSPTO_1600	Psyr_3778	CN228_RS09815						0	0	0	0	0
PSPPH_1476	PSPTO_1601	Psyr_3777	CN228_RS09820						0	0	0	0	0
PSPPH_1477	PSPTO_1602	Psyr_3776	CN228_RS09825						0	0	0	0	0
PSPPH_1478	PSPTO_1604	Psyr_3775	CN228_RS09830	PSPPH_Irp,PSPPH_4127					2	0	0	0	0.5
PSPPH_1479	PSPTO_1605	Psyr_3774	CN228_RS09835		DC3000_4127				0	1	0	0	0.25
PSPPH_1480	PSPTO_1606	Psyr_3773	CN228_RS09840						0	0	0	0	0
PSPPH_1481	PSPTO_1607	Psyr_3772	CN228_RS09845		DC3000_2193	B728a_OmpR			0	1	1	0	0.5
PSPPH_1482	PSPTO_1608	Psyr_3771	CN228_RS09850						0	0	0	0	0
PSPPH_1483	PSPTO_1609	Psyr_3770	CN228_RS09855	PSPPH_Irp	DC3000_2193				1	1	0	0	0.5
PSPPH_1484	PSPTO_1610	Psyr_3769	CN228_RS09860						0	0	0	0	0
PSPPH_1485	PSPTO_1612	Psyr_3768	CN228_RS09865	PSPPH_OmpR					1	0	0	0	0.25
PSPPH_1486									0	0	0	0	0
PSPPH_1487	PSPTO_1614	Psyr_3766	CN228_RS09880						0	0	0	0	0
PSPPH_1488	PSPTO_1615	Psyr_3764	CN228_RS09890		DC3000_2193				0	1	0	0	0.25
PSPPH_1489	PSPTO_1616	Psyr_3763	CN228_RS09895		DC3000_Irp,DC3000_2193,DC3000_4127		CN228_Irp,CN228_4127		0	3	0	2	1.25
PSPPH_1490	PSPTO_4735	Psyr_1970	CN228_RS08410	PSPPH_2193,PSPPH_4127					2	0	0	0	0.5
PSPPH_1491	PSPTO_1617	Psyr_3762	CN228_RS09900						0	0	0	0	0
PSPPH_1492	PSPTO_1617	Psyr_3762	CN228_RS09900	PSPPH_2193					1	0	0	0	0.25
PSPPH_1493	PSPTO_1618	Psyr_1558	CN228_RS09905						0	0	0	0	0
PSPPH_1494	PSPTO_1619	Psyr_3761	CN228_RS09910	PSPPH_Irp	DC3000_2193				1	1	0	0	0.5
PSPPH_1495	PSPTO_1620	Psyr_3760	CN228_RS09915						0	0	0	0	0
PSPPH_1496	PSPTO_1621	Psyr_3759	CN228_RS09920	PSPPH_Irp	DC3000_Irp,DC3000_4127		CN228_Irp		1	2	0	1	1
PSPPH_1497	PSPTO_1622	Psyr_3758	CN228_RS09930						0	0	0	0	0
PSPPH_1498	PSPTO_1623	Psyr_3757	CN228_RS09935						0	0	0	0	0
PSPPH_1499	PSPTO_1624	Psyr_3756	CN228_RS09940						0	0	0	0	0
PSPPH_1500	PSPTO_1625	Psyr_3755	CN228_RS09945		DC3000_Irp,DC3000_2193,DC3000_4127				0	3	0	0	0.75
PSPPH_1501	PSPTO_1626	Psyr_3754	CN228_RS09950						0	0	0	0	0
PSPPH_1502	PSPTO_1627	Psyr_3753	CN228_RS09955						0	0	0	0	0
PSPPH_1503	PSPTO_1628	Psyr_3752	CN228_RS09965	PSPPH_4127					1	0	0	0	0.25
PSPPH_1504	PSPTO_1629	Psyr_3751	CN228_RS09970		DC3000_Irp,DC3000_2193	B728a_Irp			0	2	1	0	0.75
PSPPH_1505	PSPTO_2135	Psyr_1372	CN228_RS22685						0	0	0	0	0
PSPPH_1506	PSPTO_1630	Psyr_3750	CN228_RS09975						0	0	0	0	0
PSPPH_1507	PSPTO_1631	Psyr_3749	CN228_RS09980						0	0	0	0	0
PSPPH_1508	PSPTO_1632	Psyr_3748	CN228_RS09985						0	0	0	0	0
PSPPH_1509	PSPTO_1633	Psyr_3747	CN228_RS09990	PSPPH_2193	DC3000_Irp,DC3000_2193				1	2	0	0	0.75
PSPPH_1510	PSPTO_2081	Psyr_1979	CN228_RS16355						0	0	0	0	0
PSPPH_1511	PSPTO_1636	Psyr_3745	CN228_RS10000						0	0	0	0	0
PSPPH_1512	PSPTO_1637	Psyr_3744	CN228_RS10005	PSPPH_3122	DC3000_3122		CN228_3122		1	1	0	1	0.75
PSPPH_1513	PSPTO_1638	Psyr_3743	CN228_RS10010						0	0	0	0	0
PSPPH_1514	PSPTO_1639	Psyr_3742	CN228_RS10015		DC3000_4127				0	1	0	0	0.25
PSPPH_1515	PSPTO_1640	Psyr_3741	CN228_RS10020		DC3000_2193				0	1	0	0	0.25
PSPPH_1516	PSPTO_1642	Psyr_3740	CN228_RS10025						0	0	0	0	0
PSPPH_1517	PSPTO_1643	Psyr_3739	CN228_RS10030						0	0	0	0	0
PSPPH_1518	PSPTO_1644	Psyr_3738	CN228_RS10035			B728a_OmpR			0	0	1	0	0.25
PSPPH_1519	PSPTO_1645	Psyr_3737	CN228_RS10040	PSPPH_2193					1	0	0	0	0.25
PSPPH_1520	PSPTO_1646	Psyr_3736	CN228_RS10045						0	0	0	0	0
PSPPH_1521	PSPTO_3670	Psyr_0835	CN228_RS10050		DC3000_2193				0	1	0	0	0.25
PSPPH_1522	PSPTO_1648	Psyr_3735	CN228_RS10055						0	0	0	0	0
PSPPH_1523	PSPTO_1649	Psyr_3734	CN228_RS10075	PSPPH_Irp	DC3000_2193,DC3000_4127				1	2	0	0	0.75
PSPPH_1524	PSPTO_2284	Psyr_2108	CN228_RS14205						0	0	0	0	0
PSPPH_1525	PSPTO_5332	Psyr_4859	CN228_RS01935		DC3000_Irp,DC3000_2193				0	2	0	0	0.5
PSPPH_1526									0	0	0	0	0
PSPPH_1527	PSPTO_5509	Psyr_3810	CN228_RS32805						0	0	0	0	0
PSPPH_1528	PSPTO_0559	Psyr_3811	CN228_RS09730						0	0	0	0	0
PSPPH_1529	PSPTO_B0039	Psyr_1435	CN228_RS20065						0	0	0	0	0
PSPPH_1530	PSPTO_3960	Psyr_2297	CN228_RS09585	PSPPH_Irp	DC3000_OmpR				1	1	0	0	0.5
PSPPH_1531	PSPTO_3959	Psyr_1542	CN228_RS09590		DC3000_4127				0	1	0	0	0.25
PSPPH_1532	PSPTO_3958	Psyr_1543	CN228_RS09595			B728a_OmpR			0	0	1	0	0.25
PSPPH_1533	PSPTO_3957	Psyr_1544	CN228_RS09600						0	0	0	0	0
PSPPH_1534	PSPTO_3956	Psyr_1545	CN228_RS09605						0	0	0	0	0
PSPPH_1535	PSPTO_3955	Psyr_1546	CN228_RS09610						0	0	0	0	0
PSPPH_1536	PSPTO_3954	Psyr_1547	CN228_RS09615	PSPPH_Irp					1	0	0	0	0.25
PSPPH_1537	PSPTO_3953	Psyr_1548	CN228_RS10245		DC3000_Irp				0	1	0	0	0.25
PSPPH_1538	PSPTO_3952	Psyr_1549	CN228_RS09625						0	0	0	0	0
PSPPH_1539	PSPTO_3951	Psyr_1550	CN228_RS09630						0	0	0	0	0
PSPPH_1540	PSPTO_3950	Psyr_1551	CN228_RS09635						0	0	0	0	0
PSPPH_1541									0	0	0	0	0
PSPPH_1542	PSPTO_5392	Psyr_5042	CN228_RS00665	PSPPH_2193		B728a_4127,B728a_OmpR			1	0	2	0	0.75
PSPPH_1543	PSPTO_3690	Psyr_1489	CN228_RS19870		DC3000_2193				0	1	0	0	0.25
PSPPH_1544	PSPTO_3925	Psyr_1560	CN228_RS23370		DC3000_Irp,DC3000_2193,DC3000_3122,DC3000_4127				0	4	0	0	1
PSPPH_1545	PSPTO_3924	Psyr_1561	CN228_RS23365	PSPPH_Irp		B728a_Irp			1	0	1	0	0.5
PSPPH_1546	PSPTO_3923	Psyr_1562	CN228_RS23360	PSPPH_Irp	DC3000_Irp,DC3000_2193,DC3000_OmpR				1	3	0	0	1
PSPPH_1547	PSPTO_3922	Psyr_1563	CN228_RS23355	PSPPH_Irp	DC3000_Irp,DC3000_2193,DC3000_4127		CN228_Irp		1	3	0	1	1.25
PSPPH_1548	PSPTO_3921	Psyr_1564	CN228_RS23350						0	0	0	0	0
PSPPH_1549	PSPTO_3920	Psyr_1565	CN228_RS23345						0	0	0	0	0
PSPPH_1550	PSPTO_3919	Psyr_1566	CN228_RS23340						0	0	0	0	0
PSPPH_1551	PSPTO_3918	Psyr_1567	CN228_RS23335		DC3000_2193				0	1	0	0	0.25
PSPPH_1552	PSPTO_3917	Psyr_1568	CN228_RS23330						0	0	0	0	0
PSPPH_1553	PSPTO_3916	Psyr_1569	CN228_RS23325						0	0	0	0	0
PSPPH_1554	PSPTO_3915	Psyr_1570	CN228_RS23320						0	0	0	0	0
PSPPH_1555									0	0	0	0	0
PSPPH_1556	PSPTO_3913	Psyr_1572	CN228_RS23310						0	0	0	0	0
PSPPH_1557	PSPTO_3912	Psyr_1573	CN228_RS23305	PSPPH_4127	DC3000_4127				1	1	0	0	0.5
PSPPH_1558	PSPTO_3911	Psyr_1574	CN228_RS23300						0	0	0	0	0
PSPPH_1559	PSPTO_3910	Psyr_1575	CN228_RS23295		DC3000_4127				0	1	0	0	0.25
PSPPH_1560	PSPTO_3909	Psyr_1576	CN228_RS23290						0	0	0	0	0
PSPPH_1561	PSPTO_3908	Psyr_1577	CN228_RS23285		DC3000_Irp		CN228_Irp		0	1	0	1	0.5
PSPPH_1562	PSPTO_3906	Psyr_1579	CN228_RS23275		DC3000_Irp				0	1	0	0	0.25
PSPPH_1563									0	0	0	0	0
PSPPH_1564	PSPTO_3904	Psyr_1581	CN228_RS23260	PSPPH_Irp					1	0	0	0	0.25
PSPPH_1565	PSPTO_3903	Psyr_1582	CN228_RS23255						0	0	0	0	0
PSPPH_1566	PSPTO_3902	Psyr_1583	CN228_RS23250		DC3000_4127				0	1	0	0	0.25
PSPPH_1567	PSPTO_3901	Psyr_1584	CN228_RS23245		DC3000_Irp		CN228_Irp		0	1	0	1	0.5
PSPPH_1568	PSPTO_3900	Psyr_1585	CN228_RS23240						0	0	0	0	0
PSPPH_1569	PSPTO_3899	Psyr_1586	CN228_RS10270						0	0	0	0	0
PSPPH_1570	PSPTO_3898	Psyr_1587	CN228_RS10290		DC3000_4127				0	1	0	0	0.25
PSPPH_1571	PSPTO_3897	Psyr_1588	CN228_RS10295			B728a_Irp,B728a_2193,B728a_OmpR			0	0	3	0	0.75
PSPPH_1572									0	0	0	0	0
PSPPH_1573									0	0	0	0	0
PSPPH_1574	PSPTO_3895	Psyr_1589	CN228_RS10315		DC3000_2193,DC3000_4127				0	2	0	0	0.5
PSPPH_1575	PSPTO_3894	Psyr_1590	CN228_RS10320						0	0	0	0	0
PSPPH_1576	PSPTO_3893	Psyr_1591	CN228_RS10325						0	0	0	0	0
PSPPH_1577	PSPTO_1682	Psyr_3707	CN228_RS23145		DC3000_4127	B728a_Irp	CN228_Irp		0	1	1	1	0.75
PSPPH_1578	PSPTO_2662	Psyr_2396	CN228_RS13990						0	0	0	0	0
PSPPH_1579	PSPTO_2663	Psyr_2397	CN228_RS13995						0	0	0	0	0
PSPPH_1580	PSPTO_3892	Psyr_1592	CN228_RS10330	PSPPH_2193					1	0	0	0	0.25
PSPPH_1581	PSPTO_3891	Psyr_1593	CN228_RS10080		DC3000_4127				0	1	0	0	0.25
PSPPH_1582	PSPTO_3890	Psyr_1594	CN228_RS10340	PSPPH_Irp					1	0	0	0	0.25
PSPPH_1583	PSPTO_3889	Psyr_1595	CN228_RS10345	PSPPH_Irp					1	0	0	0	0.25
PSPPH_1584	PSPTO_3888	Psyr_1596	CN228_RS10350						0	0	0	0	0
PSPPH_1585	PSPTO_3887	Psyr_1597	CN228_RS10355						0	0	0	0	0
PSPPH_1586	PSPTO_3886	Psyr_1598	CN228_RS10360						0	0	0	0	0
PSPPH_1587	PSPTO_3885	Psyr_1599	CN228_RS10365						0	0	0	0	0
PSPPH_1588	PSPTO_3884	Psyr_1600	CN228_RS10370						0	0	0	0	0
PSPPH_1589	PSPTO_3883	Psyr_1601	CN228_RS10375						0	0	0	0	0
PSPPH_1590	PSPTO_3882	Psyr_1602	CN228_RS10380						0	0	0	0	0
PSPPH_1591	PSPTO_3881	Psyr_1603	CN228_RS10385						0	0	0	0	0
PSPPH_1592	PSPTO_3880	Psyr_1604	CN228_RS10390						0	0	0	0	0
PSPPH_1593	PSPTO_3879	Psyr_1605	CN228_RS10395	PSPPH_Irp					1	0	0	0	0.25
PSPPH_1594	PSPTO_3878	Psyr_1606	CN228_RS10400	PSPPH_Irp		B728a_Irp	CN228_Irp		1	0	1	1	0.75
PSPPH_1595	PSPTO_3877	Psyr_1607	CN228_RS10405		DC3000_Irp,DC3000_2193,DC3000_4127				0	3	0	0	0.75
PSPPH_1596									0	0	0	0	0
PSPPH_1597	PSPTO_2135	Psyr_3887	CN228_RS22685	PSPPH_Irp,PSPPH_2193					2	0	0	0	0.5
PSPPH_1598									0	0	0	0	0
PSPPH_1599	PSPTO_3876	Psyr_1609	CN228_RS10410						0	0	0	0	0
PSPPH_1600	PSPTO_4735	Psyr_1970	CN228_RS08410						0	0	0	0	0
PSPPH_1601	PSPTO_3228	Psyr_0686	CN228_RS11810	PSPPH_Irp	DC3000_Irp,DC3000_2193,DC3000_4127				1	3	0	0	1
PSPPH_1602	PSPTO_2160	Psyr_1970	CN228_RS08410						0	0	0	0	0
PSPPH_1603	PSPTO_3875	Psyr_1610	CN228_RS10415						0	0	0	0	0
PSPPH_1604	PSPTO_3874	Psyr_1611	CN228_RS10420	PSPPH_Irp					1	0	0	0	0.25
PSPPH_1605	PSPTO_3873	Psyr_1612	CN228_RS10425	PSPPH_Irp	DC3000_Irp,DC3000_2193	B728a_Irp			1	2	1	0	1
PSPPH_1606	PSPTO_3872	Psyr_1613	CN228_RS10430	PSPPH_Irp					1	0	0	0	0.25
PSPPH_1607	PSPTO_3871	Psyr_1614	CN228_RS10435		DC3000_Irp				0	1	0	0	0.25
PSPPH_1608	PSPTO_3870	Psyr_1615	CN228_RS10440	PSPPH_2193	DC3000_2193				1	1	0	0	0.5
PSPPH_1609	PSPTO_3869	Psyr_1616	CN228_RS28410						0	0	0	0	0
PSPPH_1610	PSPTO_3868	Psyr_1617	CN228_RS21590						0	0	0	0	0
PSPPH_1611	PSPTO_3867	Psyr_1618	CN228_RS11640	PSPPH_Irp		B728a_Irp			1	0	1	0	0.5
PSPPH_1612	PSPTO_3866	Psyr_1619	CN228_RS09035		DC3000_Irp				0	1	0	0	0.25
PSPPH_1613	PSPTO_3865	Psyr_1620	CN228_RS28945	PSPPH_Irp,PSPPH_4127					2	0	0	0	0.5
PSPPH_1614	PSPTO_3864	Psyr_1621	CN228_RS12230		DC3000_2193,DC3000_4127				0	2	0	0	0.5
PSPPH_1615	PSPTO_3863	Psyr_1622	CN228_RS05755	PSPPH_4127					1	0	0	0	0.25
PSPPH_1616									0	0	0	0	0
PSPPH_1617	PSPTO_3861	Psyr_1624	CN228_RS22670	PSPPH_4127					1	0	0	0	0.25
PSPPH_1618									0	0	0	0	0
PSPPH_1619	PSPTO_3859	Psyr_1626	CN228_RS10445	PSPPH_2193	DC3000_Irp,DC3000_2193				1	2	0	0	0.75
PSPPH_1620	PSPTO_3858	Psyr_1627	CN228_RS10450						0	0	0	0	0
PSPPH_1621	PSPTO_3857	Psyr_1628	CN228_RS10455						0	0	0	0	0
PSPPH_1622	PSPTO_3856	Psyr_1629	CN228_RS10460						0	0	0	0	0
PSPPH_1623	PSPTO_3855	Psyr_1630	CN228_RS10465						0	0	0	0	0
PSPPH_1624	PSPTO_3854	Psyr_1631	CN228_RS10470						0	0	0	0	0
PSPPH_1625									0	0	0	0	0
PSPPH_1626	PSPTO_3847	Psyr_1633	CN228_RS10525						0	0	0	0	0
PSPPH_1627	PSPTO_3846	Psyr_1634	CN228_RS10530						0	0	0	0	0
PSPPH_1628	PSPTO_3845	Psyr_1635	CN228_RS10535		DC3000_Irp,DC3000_4127				0	2	0	0	0.5
PSPPH_1629	PSPTO_3844	Psyr_0564	CN228_RS10540	PSPPH_Irp					1	0	0	0	0.25
PSPPH_1630	PSPTO_3843	Psyr_1636	CN228_RS10545						0	0	0	0	0
PSPPH_1631	PSPTO_3842	Psyr_1637	CN228_RS10550						0	0	0	0	0
PSPPH_1632	PSPTO_3841	Psyr_1638	CN228_RS10555	PSPPH_2193	DC3000_2193				1	1	0	0	0.5
PSPPH_1633	PSPTO_3840	Psyr_1639	CN228_RS10560						0	0	0	0	0
PSPPH_1634	PSPTO_3839	Psyr_1640	CN228_RS10565						0	0	0	0	0
PSPPH_1635	PSPTO_3838	Psyr_1641	CN228_RS10570	PSPPH_Irp					1	0	0	0	0.25
PSPPH_1636	PSPTO_3837	Psyr_1642	CN228_RS10575						0	0	0	0	0
PSPPH_1637	PSPTO_3836	Psyr_1643	CN228_RS10580						0	0	0	0	0
PSPPH_1638	PSPTO_3835	Psyr_1644	CN228_RS10585						0	0	0	0	0
PSPPH_1639	PSPTO_3834	Psyr_1645	CN228_RS10590	PSPPH_OmpR	DC3000_3122				1	1	0	0	0.5
PSPPH_1640	PSPTO_3833	Psyr_1646	CN228_RS10595	PSPPH_Irp	DC3000_Irp		CN228_Irp		1	1	0	1	0.75
PSPPH_1641	PSPTO_3832	Psyr_1647	CN228_RS10600						0	0	0	0	0
PSPPH_1642	PSPTO_3831	Psyr_1648	CN228_RS10605		DC3000_4127	B728a_3122,B728a_4127,B728a_OmpR			0	1	3	0	1
PSPPH_1643	PSPTO_3830	Psyr_1649	CN228_RS10610		DC3000_Irp,DC3000_2193				0	2	0	0	0.5
PSPPH_1644	PSPTO_3829	Psyr_1650	CN228_RS10615						0	0	0	0	0
PSPPH_1645	PSPTO_3828	Psyr_1651	CN228_RS10620	PSPPH_2193					1	0	0	0	0.25
PSPPH_1646	PSPTO_3827	Psyr_1652	CN228_RS10830						0	0	0	0	0
PSPPH_1647	PSPTO_3826	Psyr_1653	CN228_RS10835						0	0	0	0	0
PSPPH_1648	PSPTO_3825	Psyr_1654	CN228_RS10840		DC3000_Irp				0	1	0	0	0.25
PSPPH_1649	PSPTO_3824	Psyr_1655	CN228_RS10845						0	0	0	0	0
PSPPH_1650	PSPTO_3823	Psyr_1656	CN228_RS10850		DC3000_2193				0	1	0	0	0.25
PSPPH_1651	PSPTO_3822	Psyr_1657	CN228_RS10855		DC3000_2193,DC3000_4127				0	2	0	0	0.5
PSPPH_1652	PSPTO_3821	Psyr_1658	CN228_RS10860						0	0	0	0	0
PSPPH_1653	PSPTO_3820	Psyr_1659	CN228_RS10865						0	0	0	0	0
PSPPH_1654	PSPTO_3819	Psyr_1660	CN228_RS10870						0	0	0	0	0
PSPPH_1655	PSPTO_3818	Psyr_1661	CN228_RS10875	PSPPH_Irp					1	0	0	0	0.25
PSPPH_1656	PSPTO_3817	Psyr_1662	CN228_RS10880	PSPPH_2193					1	0	0	0	0.25
PSPPH_1657	PSPTO_3816	Psyr_1663	CN228_RS10885		DC3000_Irp				0	1	0	0	0.25
PSPPH_1658	PSPTO_3815	Psyr_1664	CN228_RS10890						0	0	0	0	0
PSPPH_1659	PSPTO_3814	Psyr_1665	CN228_RS10895		DC3000_4127	B728a_4127			0	1	1	0	0.5
PSPPH_1660	PSPTO_3813	Psyr_1666	CN228_RS10900						0	0	0	0	0
PSPPH_1661	PSPTO_3812	Psyr_1667	CN228_RS10905						0	0	0	0	0
PSPPH_1662	PSPTO_3811	Psyr_1668	CN228_RS10910						0	0	0	0	0
PSPPH_1663	PSPTO_3810	Psyr_1669	CN228_RS10915						0	0	0	0	0
PSPPH_1664	PSPTO_3809	Psyr_1670	CN228_RS10920						0	0	0	0	0
PSPPH_1665									0	0	0	0	0
PSPPH_1666									0	0	0	0	0
PSPPH_1667									0	0	0	0	0
PSPPH_1668	PSPTO_3807	Psyr_1671	CN228_RS10940			B728a_Irp,B728a_OmpR	CN228_OmpR		0	0	3	1	1
PSPPH_1669	PSPTO_3806	Psyr_1672	CN228_RS10950	PSPPH_2193,PSPPH_OmpR	DC3000_Irp,DC3000_2193,DC3000_4127	B728a_Irp,B728a_2193,B728a_OmpR			2	3	3	0	2
PSPPH_1670	PSPTO_3805	Psyr_1673	CN228_RS10960	PSPPH_2193					1	0	0	0	0.25
PSPPH_1671	PSPTO_3804	Psyr_1674	CN228_RS10965						0	0	0	0	0
PSPPH_1672	PSPTO_3803	Psyr_1675	CN228_RS10970						0	0	0	0	0
PSPPH_1673	PSPTO_3802	Psyr_1676	CN228_RS10975						0	0	0	0	0
PSPPH_1674	PSPTO_3801	Psyr_1677	CN228_RS10980		DC3000_4127				0	1	0	0	0.25
PSPPH_1675	PSPTO_3801	Psyr_1677	CN228_RS10980						0	0	0	0	0
PSPPH_1676	PSPTO_3745	Psyr_1732	CN228_RS21150						0	0	0	0	0
PSPPH_1677	PSPTO_3744	Psyr_1733	CN228_RS21145	PSPPH_Irp					1	0	0	0	0.25
PSPPH_1678	PSPTO_3743	Psyr_1734	CN228_RS21140		DC3000_Irp,DC3000_4127				0	2	0	0	0.5
PSPPH_1679	PSPTO_3742	Psyr_1735	CN228_RS21135	PSPPH_Irp					1	0	0	0	0.25
PSPPH_1680	PSPTO_3741	Psyr_1736	CN228_RS21125						0	0	0	0	0
PSPPH_1681	PSPTO_3740	Psyr_1737	CN228_RS21120		DC3000_4127				0	1	0	0	0.25
PSPPH_1682	PSPTO_3739	Psyr_1738	CN228_RS21115						0	0	0	0	0
PSPPH_1683	PSPTO_3738	Psyr_1739	CN228_RS21110	PSPPH_2193	DC3000_4127				1	1	0	0	0.5
PSPPH_1684	PSPTO_3737	Psyr_1740	CN228_RS21105						0	0	0	0	0
PSPPH_1685	PSPTO_3736	Psyr_1741	CN228_RS21100						0	0	0	0	0
PSPPH_1686	PSPTO_3735	Psyr_1742	CN228_RS21095						0	0	0	0	0
PSPPH_1687	PSPTO_3733	Psyr_1743	CN228_RS21090		DC3000_Irp,DC3000_2193,DC3000_3122,DC3000_4127	B728a_Irp,B728a_2193,B728a_OmpR			0	4	3	0	1.75
PSPPH_1688									0	0	0	0	0
PSPPH_1689									0	0	0	0	0
PSPPH_1690				PSPPH_OmpR					1	0	0	0	0.25
PSPPH_1691	PSPTO_1673	Psyr_3715	CN228_RS23195						0	0	0	0	0
PSPPH_1692	PSPTO_2235	Psyr_4414	CN228_RS27445						0	0	0	0	0
PSPPH_1693	PSPTO_3229	Psyr_4467	CN228_RS17005						0	0	0	0	0
PSPPH_1694	PSPTO_5168	Psyr_4777	CN228_RS29310	PSPPH_Irp					1	0	0	0	0.25
PSPPH_1695	PSPTO_1329	Psyr_1145	CN228_RS06710	PSPPH_4127					1	0	0	0	0.25
PSPPH_1696	PSPTO_4232	Psyr_3966	CN228_RS24305	PSPPH_Irp					1	0	0	0	0.25
PSPPH_1697	PSPTO_3727	Psyr_1746	CN228_RS21060	PSPPH_Irp					1	0	0	0	0.25
PSPPH_1698	PSPTO_3726	Psyr_1747	CN228_RS21055	PSPPH_OmpR					1	0	0	0	0.25
PSPPH_1699	PSPTO_3725	Psyr_1748	CN228_RS21050	PSPPH_2193,PSPPH_OmpR	DC3000_2193				2	1	0	0	0.75
PSPPH_1700	PSPTO_3724	Psyr_1749	CN228_RS21045	PSPPH_4127,PSPPH_OmpR	DC3000_4127				2	1	0	0	0.75
PSPPH_1701	PSPTO_3723	Psyr_1750	CN228_RS21040	PSPPH_Irp	DC3000_2193				1	1	0	0	0.5
PSPPH_1702	PSPTO_3722	Psyr_1751	CN228_RS21035				CN228_OmpR		0	0	0	1	0.25
PSPPH_1703	PSPTO_3721	Psyr_1754	CN228_RS21030						0	0	0	0	0
PSPPH_1704	PSPTO_3720	Psyr_1755	CN228_RS21025						0	0	0	0	0
PSPPH_1705	PSPTO_3719	Psyr_1756	CN228_RS21020		DC3000_Irp		CN228_Irp		0	1	0	1	0.5
PSPPH_1706	PSPTO_3718	Psyr_1757	CN228_RS21015						0	0	0	0	0
PSPPH_1707	PSPTO_3717	Psyr_1758	CN228_RS21010						0	0	0	0	0
PSPPH_1708	PSPTO_3716	Psyr_1759	CN228_RS21005						0	0	0	0	0
PSPPH_1709	PSPTO_3715	Psyr_1760	CN228_RS21000			B728a_4127			0	0	1	0	0.25
PSPPH_1710	PSPTO_3714	Psyr_1761	CN228_RS20995	PSPPH_2193		B728a_OmpR			1	0	1	0	0.5
PSPPH_1711	PSPTO_3713	Psyr_1762	CN228_RS20990		DC3000_2193				0	1	0	0	0.25
PSPPH_1712	PSPTO_3712	Psyr_1763	CN228_RS20985						0	0	0	0	0
PSPPH_1713	PSPTO_4975	Psyr_3028	CN228_RS28215						0	0	0	0	0
PSPPH_1714	PSPTO_1421	Psyr_1147	CN228_RS07185	PSPPH_2193					1	0	0	0	0.25
PSPPH_1715	PSPTO_3711	Psyr_1764	CN228_RS20980						0	0	0	0	0
PSPPH_1716	PSPTO_3710	Psyr_1765	CN228_RS20975	PSPPH_Irp	DC3000_Irp,DC3000_2193,DC3000_4127		CN228_Irp		1	3	0	1	1.25
PSPPH_1717	PSPTO_3709	Psyr_1766	CN228_RS20970						0	0	0	0	0
PSPPH_1718	PSPTO_3708	Psyr_1767	CN228_RS20965		DC3000_Irp				0	1	0	0	0.25
PSPPH_1719	PSPTO_3707	Psyr_1768	CN228_RS20960						0	0	0	0	0
PSPPH_1720	PSPTO_3706	Psyr_1769	CN228_RS20955						0	0	0	0	0
PSPPH_1721	PSPTO_3705	Psyr_1770	CN228_RS20950	PSPPH_Irp					1	0	0	0	0.25
PSPPH_1722	PSPTO_3704	Psyr_1771	CN228_RS20940		DC3000_2193				0	1	0	0	0.25
PSPPH_1723	PSPTO_3703	Psyr_1772	CN228_RS20935		DC3000_4127				0	1	0	0	0.25
PSPPH_1724	PSPTO_3702	Psyr_1773	CN228_RS20925		DC3000_OmpR	B728a_OmpR			0	1	1	0	0.5
PSPPH_1725	PSPTO_3701	Psyr_1774	CN228_RS20920			B728a_OmpR			0	0	1	0	0.25
PSPPH_1726	PSPTO_3700	Psyr_1775	CN228_RS20915						0	0	0	0	0
PSPPH_1727	PSPTO_3699	Psyr_1776	CN228_RS20910	PSPPH_4127	DC3000_2193,DC3000_4127				1	2	0	0	0.75
PSPPH_1728	PSPTO_3698	Psyr_1777	CN228_RS20905						0	0	0	0	0
PSPPH_1729	PSPTO_3696	Psyr_1778	CN228_RS20895						0	0	0	0	0
PSPPH_1730	PSPTO_3695	Psyr_1780	CN228_RS20890		DC3000_Irp				0	1	0	0	0.25
PSPPH_1731									0	0	0	0	0
PSPPH_1732	PSPTO_3693	Psyr_1782	CN228_RS20880		DC3000_Irp	B728a_Irp			0	1	1	0	0.5
PSPPH_1733									0	0	0	0	0
PSPPH_1734	PSPTO_5558	Psyr_0660	CN228_RS20860	PSPPH_4127		B728a_4127			1	0	1	0	0.5
PSPPH_1735	PSPTO_4735	Psyr_1970	CN228_RS08410						0	0	0	0	0
PSPPH_1736	PSPTO_3692	Psyr_1784	CN228_RS12315			B728a_OmpR			0	0	1	0	0.25
PSPPH_1737	PSPTO_3081	Psyr_2938	CN228_RS16050						0	0	0	0	0
PSPPH_1738	PSPTO_3106	Psyr_0129	CN228_RS17020		DC3000_2193				0	1	0	0	0.25
PSPPH_1739	PSPTO_1365	Psyr_1842	CN228_RS11565						0	0	0	0	0
PSPPH_1740	PSPTO_3689	Psyr_1785	CN228_RS20855		DC3000_Irp,DC3000_2193				0	2	0	0	0.5
PSPPH_1741	PSPTO_3535	Psyr_3307	CN228_RS20850						0	0	0	0	0
PSPPH_1742	PSPTO_3688	Psyr_1786	CN228_RS20845						0	0	0	0	0
PSPPH_1743	PSPTO_3687	Psyr_1787	CN228_RS20840						0	0	0	0	0
PSPPH_1744	PSPTO_3686	Psyr_1788	CN228_RS20830						0	0	0	0	0
PSPPH_1745	PSPTO_3685	Psyr_1789	CN228_RS00360		DC3000_4127		CN228_Irp		0	1	0	1	0.5
PSPPH_1746	PSPTO_5453	Psyr_1790	CN228_RS00880	PSPPH_2193					1	0	0	0	0.25
PSPPH_1747	PSPTO_4659	Psyr_1791	CN228_RS04160		DC3000_4127				0	1	0	0	0.25
PSPPH_1748	PSPTO_3683	Psyr_2352	CN228_RS20815						0	0	0	0	0
PSPPH_1749	PSPTO_4699	Psyr_1792	CN228_RS12300				CN228_Irp		0	0	0	1	0.25
PSPPH_1750	PSPTO_4699	Psyr_1793	CN228_RS12300						0	0	0	0	0
PSPPH_1751	PSPTO_2830	Psyr_1794	CN228_RS13555						0	0	0	0	0
PSPPH_1752	PSPTO_5198	Psyr_1795	CN228_RS29485						0	0	0	0	0
PSPPH_1753	PSPTO_3229	Psyr_1796	CN228_RS13630						0	0	0	0	0
PSPPH_1754	PSPTO_3682	Psyr_1797	CN228_RS20810						0	0	0	0	0
PSPPH_1755	PSPTO_0267	Psyr_4555	CN228_RS18815						0	0	0	0	0
PSPPH_1756	PSPTO_3680	Psyr_1798	CN228_RS20805						0	0	0	0	0
PSPPH_1757	PSPTO_3679	Psyr_1799	CN228_RS20800	PSPPH_2193					1	0	0	0	0.25
PSPPH_1758	PSPTO_3678	Psyr_1800	CN228_RS20795						0	0	0	0	0
PSPPH_1759	PSPTO_3677	Psyr_0929	CN228_RS16020	PSPPH_2193					1	0	0	0	0.25
PSPPH_1760	PSPTO_3676	Psyr_0492	CN228_RS20785						0	0	0	0	0
PSPPH_1761	PSPTO_3675	Psyr_1801	CN228_RS20780	PSPPH_OmpR					1	0	0	0	0.25
PSPPH_1762	PSPTO_3674	Psyr_1802	CN228_RS20775	PSPPH_OmpR	DC3000_Irp,DC3000_2193				1	2	0	0	0.75
PSPPH_1763	PSPTO_3672	Psyr_1803	CN228_RS20765	PSPPH_Irp					1	0	0	0	0.25
PSPPH_1764									0	0	0	0	0
PSPPH_1765	PSPTO_3670	Psyr_1805	CN228_RS20735						0	0	0	0	0
PSPPH_1766	PSPTO_3669	Psyr_1806	CN228_RS20730	PSPPH_Irp					1	0	0	0	0.25
PSPPH_1767	PSPTO_3668	Psyr_1807	CN228_RS20725						0	0	0	0	0
PSPPH_1768	PSPTO_3667	Psyr_1808	CN228_RS20720						0	0	0	0	0
PSPPH_1769	PSPTO_3666	Psyr_1809	CN228_RS20715	PSPPH_Irp,PSPPH_2193					2	0	0	0	0.5
PSPPH_1770	PSPTO_3665	Psyr_1810	CN228_RS20710		DC3000_Irp,DC3000_2193,DC3000_4127		CN228_Irp		0	3	0	1	1
PSPPH_1771	PSPTO_3664	Psyr_1811	CN228_RS20705		DC3000_Irp,DC3000_2193				0	2	0	0	0.5
PSPPH_1772	PSPTO_3663	Psyr_1812	CN228_RS20695						0	0	0	0	0
PSPPH_1773	PSPTO_3662	Psyr_1813	CN228_RS20690						0	0	0	0	0
PSPPH_1774	PSPTO_3661	Psyr_1814	CN228_RS20685						0	0	0	0	0
PSPPH_1775	PSPTO_3660	Psyr_1815	CN228_RS20680	PSPPH_2193					1	0	0	0	0.25
PSPPH_1776	PSPTO_3659	Psyr_1816	CN228_RS20675				CN228_Irp		0	0	0	1	0.25
PSPPH_1777	PSPTO_3658	Psyr_1817	CN228_RS20670						0	0	0	0	0
PSPPH_1778	PSPTO_3657	Psyr_1818	CN228_RS20665	PSPPH_Irp,PSPPH_2193,PSPPH_3122	DC3000_Irp,DC3000_2193,DC3000_4127		CN228_Irp		3	3	0	1	1.75
PSPPH_1779	PSPTO_3656	Psyr_1819	CN228_RS20660						0	0	0	0	0
PSPPH_1780	PSPTO_3655	Psyr_1820	CN228_RS20655						0	0	0	0	0
PSPPH_1781	PSPTO_3654	Psyr_1821	CN228_RS20650		DC3000_2193				0	1	0	0	0.25
PSPPH_1782	PSPTO_3649	Psyr_1822	CN228_RS24965		DC3000_Irp				0	1	0	0	0.25
PSPPH_1783	PSPTO_3648	Psyr_1823	CN228_RS20620		DC3000_2193,DC3000_OmpR	B728a_OmpR	CN228_OmpR		0	2	1	1	1
PSPPH_1784	PSPTO_3647	Psyr_1824	CN228_RS20615						0	0	0	0	0
PSPPH_1785	PSPTO_3646	Psyr_1825	CN228_RS20610						0	0	0	0	0
PSPPH_1786	PSPTO_3645	Psyr_1826	CN228_RS20605	PSPPH_2193					1	0	0	0	0.25
PSPPH_1787	PSPTO_2018	Psyr_1827	CN228_RS11480						0	0	0	0	0
PSPPH_1788	PSPTO_2019	Psyr_1828	CN228_RS11485						0	0	0	0	0
PSPPH_1789	PSPTO_2020	Psyr_1829	CN228_RS11490	PSPPH_2193	DC3000_Irp				1	1	0	0	0.5
PSPPH_1790	PSPTO_2021	Psyr_1830	CN228_RS11495						0	0	0	0	0
PSPPH_1791	PSPTO_2022	Psyr_1831	CN228_RS11500		DC3000_Irp				0	1	0	0	0.25
PSPPH_1792	PSPTO_2023	Psyr_1832	CN228_RS11505						0	0	0	0	0
PSPPH_1793	PSPTO_2024	Psyr_1833	CN228_RS11510	PSPPH_OmpR					1	0	0	0	0.25
PSPPH_1794	PSPTO_2025	Psyr_1834	CN228_RS11515						0	0	0	0	0
PSPPH_1795	PSPTO_2026	Psyr_1835	CN228_RS11520			B728a_OmpR			0	0	1	0	0.25
PSPPH_1796	PSPTO_2028	Psyr_1836	CN228_RS11530						0	0	0	0	0
PSPPH_1797	PSPTO_2029	Psyr_1837	CN228_RS11540		DC3000_4127				0	1	0	0	0.25
PSPPH_1798	PSPTO_2030	Psyr_1838	CN228_RS11545						0	0	0	0	0
PSPPH_1799	PSPTO_2031	Psyr_1839	CN228_RS11550						0	0	0	0	0
PSPPH_1800	PSPTO_3207	Psyr_1840	CN228_RS11555	PSPPH_Irp	DC3000_Irp				1	1	0	0	0.5
PSPPH_1801									0	0	0	0	0
PSPPH_1802	PSPTO_2032	Psyr_1842	CN228_RS11565						0	0	0	0	0
PSPPH_1803	PSPTO_2033	Psyr_1843	CN228_RS11570	PSPPH_2193					1	0	0	0	0.25
PSPPH_1804	PSPTO_2034	Psyr_1844	CN228_RS11575						0	0	0	0	0
PSPPH_1805	PSPTO_2035	Psyr_1845	CN228_RS11580	PSPPH_4127					1	0	0	0	0.25
PSPPH_1806	PSPTO_2037	Psyr_1847	CN228_RS11595						0	0	0	0	0
PSPPH_1807	PSPTO_2038	Psyr_1848	CN228_RS11600						0	0	0	0	0
PSPPH_1808	PSPTO_2039	Psyr_1849	CN228_RS11605						0	0	0	0	0
PSPPH_1809	PSPTO_2040	Psyr_1850	CN228_RS11610						0	0	0	0	0
PSPPH_1810	PSPTO_2041	Psyr_1851	CN228_RS11615						0	0	0	0	0
PSPPH_1811	PSPTO_2042	Psyr_1852	CN228_RS11620						0	0	0	0	0
PSPPH_1812	PSPTO_2043	Psyr_1853	CN228_RS11625						0	0	0	0	0
PSPPH_1813	PSPTO_2044	Psyr_1854	CN228_RS11630						0	0	0	0	0
PSPPH_1814	PSPTO_2045	Psyr_1855	CN228_RS11635						0	0	0	0	0
PSPPH_1815	PSPTO_2046	Psyr_1856	CN228_RS11640						0	0	0	0	0
PSPPH_1816	PSPTO_2047	Psyr_1857	CN228_RS11645						0	0	0	0	0
PSPPH_1817	PSPTO_4690								0	0	0	0	0
PSPPH_1818	PSPTO_2048	Psyr_1858	CN228_RS11650		DC3000_4127				0	1	0	0	0.25
PSPPH_1819	PSPTO_2049	Psyr_1859	CN228_RS11655						0	0	0	0	0
PSPPH_1820	PSPTO_2051	Psyr_1860	CN228_RS11665						0	0	0	0	0
PSPPH_1821	PSPTO_2052	Psyr_1861	CN228_RS11670						0	0	0	0	0
PSPPH_1822	PSPTO_2053	Psyr_1862	CN228_RS11675						0	0	0	0	0
PSPPH_1823	PSPTO_2054	Psyr_1863	CN228_RS11680						0	0	0	0	0
PSPPH_1824	PSPTO_2055	Psyr_1864	CN228_RS11685						0	0	0	0	0
PSPPH_1825	PSPTO_2056	Psyr_1865	CN228_RS11690			B728a_OmpR			0	0	1	0	0.25
PSPPH_1826	PSPTO_0950	Psyr_1866	CN228_RS11695	PSPPH_4127					1	0	0	0	0.25
PSPPH_1827	PSPTO_2057	Psyr_1867	CN228_RS11700	PSPPH_OmpR	DC3000_2193,DC3000_4127				1	2	0	0	0.75
PSPPH_1828	PSPTO_2059	Psyr_1869	CN228_RS11705						0	0	0	0	0
PSPPH_1829	PSPTO_2060	Psyr_1870	CN228_RS11710	PSPPH_2193					1	0	0	0	0.25
PSPPH_1830	PSPTO_2061	Psyr_1871	CN228_RS11715	PSPPH_4127	DC3000_4127				1	1	0	0	0.5
PSPPH_1831	PSPTO_2062	Psyr_1872	CN228_RS11720	PSPPH_2193	DC3000_2193				1	1	0	0	0.5
PSPPH_1832									0	0	0	0	0
PSPPH_1833	PSPTO_2064	Psyr_1874	CN228_RS11730		DC3000_2193				0	1	0	0	0.25
PSPPH_1834	PSPTO_2065	Psyr_1875	CN228_RS11735	PSPPH_4127	DC3000_2193				1	1	0	0	0.5
PSPPH_1835	PSPTO_2066	Psyr_1876	CN228_RS11740						0	0	0	0	0
PSPPH_1836	PSPTO_2068	Psyr_1877	CN228_RS11750						0	0	0	0	0
PSPPH_1837	PSPTO_1312	Psyr_1878	CN228_RS11765						0	0	0	0	0
PSPPH_1838	PSPTO_2069	Psyr_1879	CN228_RS11770						0	0	0	0	0
PSPPH_1839	PSPTO_2070	Psyr_1880	CN228_RS11775		DC3000_Irp				0	1	0	0	0.25
PSPPH_1840	PSPTO_2071	Psyr_1881	CN228_RS11780	PSPPH_Irp	DC3000_Irp,DC3000_2193				1	2	0	0	0.75
PSPPH_1841	PSPTO_2072	Psyr_1882	CN228_RS11785		DC3000_2193				0	1	0	0	0.25
PSPPH_1842	PSPTO_2124	Psyr_1883	CN228_RS12130		DC3000_Irp,DC3000_2193,DC3000_4127				0	3	0	0	0.75
PSPPH_1843	PSPTO_1572	Psyr_0419	CN228_RS29010		DC3000_2193				0	1	0	0	0.25
PSPPH_1844	PSPTO_4695	Psyr_4607	CN228_RS06405	PSPPH_2193					1	0	0	0	0.25
PSPPH_1845	PSPTO_3044	Psyr_4608	CN228_RS31785						0	0	0	0	0
PSPPH_1846									0	0	0	0	0
PSPPH_1847	PSPTO_2097	Psyr_1892	CN228_RS11985						0	0	0	0	0
PSPPH_1848	PSPTO_2098	Psyr_1893	CN228_RS11990						0	0	0	0	0
PSPPH_1849	PSPTO_2099	Psyr_1894	CN228_RS11995		DC3000_Irp				0	1	0	0	0.25
PSPPH_1850	PSPTO_2100	Psyr_1895	CN228_RS12000						0	0	0	0	0
PSPPH_1851	PSPTO_2101	Psyr_1896	CN228_RS12005		DC3000_Irp				0	1	0	0	0.25
PSPPH_1852	PSPTO_2102	Psyr_1897	CN228_RS12010		DC3000_2193				0	1	0	0	0.25
PSPPH_1853	PSPTO_2103	Psyr_1898	CN228_RS12015	PSPPH_Irp	DC3000_Irp				1	1	0	0	0.5
PSPPH_1854	PSPTO_2104	Psyr_1899	CN228_RS12020	PSPPH_4127	DC3000_4127,DC3000_OmpR	B728a_OmpR	CN228_OmpR		1	2	1	1	1.25
PSPPH_1855	PSPTO_2105	Psyr_1900	CN228_RS12025						0	0	0	0	0
PSPPH_1856	PSPTO_2106	Psyr_1901	CN228_RS12030	PSPPH_Irp	DC3000_Irp		CN228_Irp		1	1	0	1	0.75
PSPPH_1857	PSPTO_2107	Psyr_1902	CN228_RS12035	PSPPH_4127					1	0	0	0	0.25
PSPPH_1858	PSPTO_2108	Psyr_1903	CN228_RS12040						0	0	0	0	0
PSPPH_1859	PSPTO_2109	Psyr_1904	CN228_RS12045						0	0	0	0	0
PSPPH_1860	PSPTO_2110	Psyr_1905	CN228_RS12050	PSPPH_4127	DC3000_4127				1	1	0	0	0.5
PSPPH_1861	PSPTO_2111	Psyr_1906	CN228_RS12055						0	0	0	0	0
PSPPH_1862	PSPTO_2112	Psyr_1907	CN228_RS12060	PSPPH_Irp	DC3000_Irp	B728a_Irp			1	1	1	0	0.75
PSPPH_1863	PSPTO_2113	Psyr_1908	CN228_RS12070	PSPPH_Irp					1	0	0	0	0.25
PSPPH_1864	PSPTO_2114	Psyr_1909	CN228_RS12075	PSPPH_Irp					1	0	0	0	0.25
PSPPH_1865	PSPTO_2115	Psyr_1910	CN228_RS12080						0	0	0	0	0
PSPPH_1866	PSPTO_2116	Psyr_1911	CN228_RS12085	PSPPH_2193,PSPPH_OmpR	DC3000_Irp,DC3000_2193				2	2	0	0	1
PSPPH_1867	PSPTO_2117	Psyr_1912	CN228_RS12090	PSPPH_OmpR					1	0	0	0	0.25
PSPPH_1868	PSPTO_2118	Psyr_1913	CN228_RS12095		DC3000_2193	B728a_OmpR			0	1	1	0	0.5
PSPPH_1869	PSPTO_2119	Psyr_1914	CN228_RS12100	PSPPH_Irp,PSPPH_2193					2	0	0	0	0.5
PSPPH_1870	PSPTO_3692	Psyr_1784	CN228_RS16530						0	0	0	0	0
PSPPH_1871	PSPTO_2120	Psyr_1915	CN228_RS12105						0	0	0	0	0
PSPPH_1872	PSPTO_2121	Psyr_1916	CN228_RS12110						0	0	0	0	0
PSPPH_1873	PSPTO_2122	Psyr_1917	CN228_RS12115						0	0	0	0	0
PSPPH_1874	PSPTO_2123	Psyr_1918	CN228_RS12120						0	0	0	0	0
PSPPH_1875	PSPTO_5172	Psyr_0366	CN228_RS25080						0	0	0	0	0
PSPPH_1876	PSPTO_0004	Psyr_5117	CN228_RS32280						0	0	0	0	0
PSPPH_1877									0	0	0	0	0
PSPPH_1878	PSPTO_4735	Psyr_1970	CN228_RS08410						0	0	0	0	0
PSPPH_1879									0	0	0	0	0
PSPPH_1880	PSPTO_3391	Psyr_1960	CN228_RS31390	PSPPH_2193					1	0	0	0	0.25
PSPPH_1881	PSPTO_3390	Psyr_0066	CN228_RS32190						0	0	0	0	0
PSPPH_1882	PSPTO_3389	Psyr_4583	CN228_RS02595						0	0	0	0	0
PSPPH_1883	PSPTO_3388	Psyr_2233	CN228_RS17450						0	0	0	0	0
PSPPH_1884									0	0	0	0	0
PSPPH_1885	PSPTO_4345	Psyr_4039	CN228_RS27640	PSPPH_Irp		B728a_OmpR			1	0	1	0	0.5
PSPPH_1886	PSPTO_3792	Psyr_3095	CN228_RS27645						0	0	0	0	0
PSPPH_1887	PSPTO_2135	Psyr_3887	CN228_RS22685						0	0	0	0	0
PSPPH_1888	PSPTO_3417	Psyr_0563	CN228_RS08300	PSPPH_2193					1	0	0	0	0.25
PSPPH_1889	PSPTO_3416	Psyr_2436	CN228_RS15760	PSPPH_3122,PSPPH_4127	DC3000_2193,DC3000_4127				2	2	0	0	1
PSPPH_1890	PSPTO_3415	Psyr_1700	CN228_RS21360						0	0	0	0	0
PSPPH_1891	PSPTO_0181	Psyr_0015	CN228_RS31895						0	0	0	0	0
PSPPH_1892	PSPTO_3390	Psyr_1814	CN228_RS20685						0	0	0	0	0
PSPPH_1893	PSPTO_3389	Psyr_4583	CN228_RS02595						0	0	0	0	0
PSPPH_1894	PSPTO_3388	Psyr_2233	CN228_RS17450						0	0	0	0	0
PSPPH_1895	PSPTO_4095	Psyr_2616	CN228_RS23465						0	0	0	0	0
PSPPH_1896	PSPTO_4084	Psyr_3823	CN228_RS23415						0	0	0	0	0
PSPPH_1897	PSPTO_3949	Psyr_0185	CN228_RS31005	PSPPH_Irp	DC3000_2193				1	1	0	0	0.5
PSPPH_1898	PSPTO_2126	Psyr_1936	CN228_RS12180	PSPPH_OmpR	DC3000_4127				1	1	0	0	0.5
PSPPH_1899	PSPTO_5162	Psyr_5085	CN228_RS12185				CN228_Irp		0	0	0	1	0.25
PSPPH_1900	PSPTO_2941	Psyr_2187	CN228_RS08710						0	0	0	0	0
PSPPH_1901	PSPTO_5547	Psyr_2562	CN228_RS15985						0	0	0	0	0
PSPPH_1902	PSPTO_2135	Psyr_3887	CN228_RS22685						0	0	0	0	0
PSPPH_1903	PSPTO_2127	Psyr_1937	CN228_RS12190	PSPPH_Irp	DC3000_Irp		CN228_Irp		1	1	0	1	0.75
PSPPH_1904	PSPTO_2128	Psyr_1938	CN228_RS12195	PSPPH_4127					1	0	0	0	0.25
PSPPH_1905	PSPTO_2129	Psyr_1939	CN228_RS12200						0	0	0	0	0
PSPPH_1906	PSPTO_2130	Psyr_1940	CN228_RS12205						0	0	0	0	0
PSPPH_1907	PSPTO_2131	Psyr_1941	CN228_RS12210	PSPPH_Irp					1	0	0	0	0.25
PSPPH_1908	PSPTO_2132	Psyr_1942	CN228_RS12215						0	0	0	0	0
PSPPH_1909	PSPTO_2133	Psyr_1943	CN228_RS12220						0	0	0	0	0
PSPPH_1910	PSPTO_2134	Psyr_1944	CN228_RS12225						0	0	0	0	0
PSPPH_1911	PSPTO_2135	Psyr_1945	CN228_RS12230						0	0	0	0	0
PSPPH_1912	PSPTO_2136	Psyr_1946	CN228_RS12235						0	0	0	0	0
PSPPH_1913	PSPTO_2137	Psyr_1947	CN228_RS12240						0	0	0	0	0
PSPPH_1914	PSPTO_2138	Psyr_1948	CN228_RS12245						0	0	0	0	0
PSPPH_1915	PSPTO_2139	Psyr_1949	CN228_RS12250						0	0	0	0	0
PSPPH_1916	PSPTO_2140	Psyr_1950	CN228_RS12255						0	0	0	0	0
PSPPH_1917	PSPTO_2141	Psyr_1951	CN228_RS12260						0	0	0	0	0
PSPPH_1918	PSPTO_2142	Psyr_1952	CN228_RS12265						0	0	0	0	0
PSPPH_1919	PSPTO_2143	Psyr_1953	CN228_RS12270						0	0	0	0	0
PSPPH_1920	PSPTO_2144	Psyr_1954	CN228_RS12275						0	0	0	0	0
PSPPH_1921	PSPTO_2145	Psyr_1955	CN228_RS12280	PSPPH_Irp,PSPPH_4127	DC3000_Irp,DC3000_4127	B728a_OmpR			2	2	1	0	1.25
PSPPH_1922	PSPTO_2146	Psyr_1956	CN228_RS12285				CN228_4127		0	0	0	1	0.25
PSPPH_1923	PSPTO_2147	Psyr_1957	CN228_RS12290						0	0	0	0	0
PSPPH_1924	PSPTO_2148	Psyr_1958	CN228_RS12295						0	0	0	0	0
PSPPH_1925	PSPTO_2149	Psyr_1959	CN228_RS12300	PSPPH_Irp,PSPPH_4127	DC3000_Irp	B728a_4127			2	1	1	0	1
PSPPH_1926	PSPTO_2150	Psyr_1960	CN228_RS12305		DC3000_4127				0	1	0	0	0.25
PSPPH_1927	PSPTO_2151	Psyr_1961	CN228_RS12315						0	0	0	0	0
PSPPH_1928	PSPTO_2152	Psyr_1962	CN228_RS16530	PSPPH_Irp	DC3000_Irp				1	1	0	0	0.5
PSPPH_1929	PSPTO_2153	Psyr_1963	CN228_RS16520						0	0	0	0	0
PSPPH_1930	PSPTO_2154	Psyr_1964	CN228_RS16515						0	0	0	0	0
PSPPH_1931	PSPTO_2155	Psyr_1965	CN228_RS16510		DC3000_4127				0	1	0	0	0.25
PSPPH_1932	PSPTO_2156	Psyr_1966	CN228_RS16505						0	0	0	0	0
PSPPH_1933	PSPTO_5624	Psyr_1967	CN228_RS16500						0	0	0	0	0
PSPPH_1934	PSPTO_2158	Psyr_1968	CN228_RS16490						0	0	0	0	0
PSPPH_1935	PSPTO_2159	Psyr_1969	CN228_RS16485						0	0	0	0	0
PSPPH_1936	PSPTO_2160	Psyr_1970	CN228_RS16480	PSPPH_Irp					1	0	0	0	0.25
PSPPH_1937	PSPTO_2161	Psyr_1971	CN228_RS16475						0	0	0	0	0
PSPPH_1938	PSPTO_2162	Psyr_1972	CN228_RS16470	PSPPH_2193					1	0	0	0	0.25
PSPPH_1939	PSPTO_2163	Psyr_1973	CN228_RS16465	PSPPH_Irp	DC3000_Irp,DC3000_2193				1	2	0	0	0.75
PSPPH_1940	PSPTO_4825	Psyr_4365	CN228_RS28240						0	0	0	0	0
PSPPH_1941	PSPTO_2164	Psyr_1974	CN228_RS16460		DC3000_4127				0	1	0	0	0.25
PSPPH_1942	PSPTO_2166	Psyr_1977	CN228_RS16450						0	0	0	0	0
PSPPH_1943									0	0	0	0	0
PSPPH_1944									0	0	0	0	0
PSPPH_1945									0	0	0	0	0
PSPPH_1946									0	0	0	0	0
PSPPH_1947	PSPTO_2168	Psyr_1978	CN228_RS16360			B728a_OmpR			0	0	1	0	0.25
PSPPH_1948	PSPTO_2169	Psyr_1979	CN228_RS16355						0	0	0	0	0
PSPPH_1949	PSPTO_2170	Psyr_1980	CN228_RS16350	PSPPH_Irp					1	0	0	0	0.25
PSPPH_1950	PSPTO_2171	Psyr_1981	CN228_RS16345						0	0	0	0	0
PSPPH_1951	PSPTO_2172	Psyr_1982	CN228_RS16340	PSPPH_2193	DC3000_2193				1	1	0	0	0.5
PSPPH_1952	PSPTO_2173	Psyr_1983	CN228_RS16335		DC3000_Irp				0	1	0	0	0.25
PSPPH_1953	PSPTO_2174	Psyr_1984	CN228_RS16330						0	0	0	0	0
PSPPH_1954	PSPTO_2175	Psyr_1985	CN228_RS16325	PSPPH_Irp			CN228_4127		1	0	0	1	0.5
PSPPH_1955	PSPTO_2176	Psyr_1986	CN228_RS16320						0	0	0	0	0
PSPPH_1956	PSPTO_2177	Psyr_1987	CN228_RS16315		DC3000_2193				0	1	0	0	0.25
PSPPH_1957	PSPTO_2178	Psyr_1988	CN228_RS16310						0	0	0	0	0
PSPPH_1958	PSPTO_2179	Psyr_1989	CN228_RS16305						0	0	0	0	0
PSPPH_1959	PSPTO_2180	Psyr_1990	CN228_RS16295						0	0	0	0	0
PSPPH_1960	PSPTO_2181	Psyr_1991	CN228_RS16290						0	0	0	0	0
PSPPH_1961	PSPTO_2182	Psyr_1992	CN228_RS16285		DC3000_2193				0	1	0	0	0.25
PSPPH_1962	PSPTO_2183	Psyr_1993	CN228_RS16195						0	0	0	0	0
PSPPH_1963	PSPTO_1892	Psyr_1994	CN228_RS16190	PSPPH_4127		B728a_4127			1	0	1	0	0.5
PSPPH_1964	PSPTO_2185	Psyr_1995	CN228_RS16185		DC3000_Irp,DC3000_2193,DC3000_4127		CN228_4127		0	3	0	1	1
PSPPH_1965	PSPTO_2186	Psyr_1996	CN228_RS16180						0	0	0	0	0
PSPPH_1966	PSPTO_2187	Psyr_1997	CN228_RS16175						0	0	0	0	0
PSPPH_1967	PSPTO_2188	Psyr_1998	CN228_RS16170		DC3000_4127				0	1	0	0	0.25
PSPPH_1968	PSPTO_2189	Psyr_1999	CN228_RS16165						0	0	0	0	0
PSPPH_1969	PSPTO_2190	Psyr_2000	CN228_RS16160		DC3000_Irp,DC3000_4127	B728a_Irp,B728a_4127	CN228_4127		0	2	2	1	1.25
PSPPH_1970	PSPTO_2191	Psyr_2001	CN228_RS16155						0	0	0	0	0
PSPPH_1971	PSPTO_2192	Psyr_2002	CN228_RS16150	PSPPH_Irp	DC3000_Irp,DC3000_4127				1	2	0	0	0.75
PSPPH_1972	PSPTO_2193	Psyr_2003	CN228_RS16145						0	0	0	0	0
PSPPH_1973	PSPTO_2193	Psyr_2003	CN228_RS16145						0	0	0	0	0
PSPPH_1974	PSPTO_2194	Psyr_2004	CN228_RS16140		DC3000_Irp,DC3000_4127				0	2	0	0	0.5
PSPPH_1975	PSPTO_0071	Psyr_2388	CN228_RS30270						0	0	0	0	0
PSPPH_1976	PSPTO_2195	Psyr_2005	CN228_RS16135		DC3000_2193				0	1	0	0	0.25
PSPPH_1977	PSPTO_2196	Psyr_2006	CN228_RS16130						0	0	0	0	0
PSPPH_1978	PSPTO_2197	Psyr_2007	CN228_RS16125						0	0	0	0	0
PSPPH_1979	PSPTO_2198	Psyr_2008	CN228_RS16120						0	0	0	0	0
PSPPH_1980	PSPTO_2199	Psyr_2009	CN228_RS16115		DC3000_OmpR				0	1	0	0	0.25
PSPPH_1981	PSPTO_2200	Psyr_2010	CN228_RS16110		DC3000_Irp	B728a_Irp			0	1	1	0	0.5
PSPPH_1982	PSPTO_2201	Psyr_2011	CN228_RS16105		DC3000_2193				0	1	0	0	0.25
PSPPH_1983	PSPTO_2202	Psyr_2012	CN228_RS16100				CN228_OmpR		0	0	0	1	0.25
PSPPH_1984	PSPTO_2203	Psyr_2013	CN228_RS16095	PSPPH_Irp	DC3000_Irp				1	1	0	0	0.5
PSPPH_1985	PSPTO_2206	Psyr_2015	CN228_RS16085						0	0	0	0	0
PSPPH_1986	PSPTO_2207	Psyr_2016	CN228_RS18410		DC3000_Irp				0	1	0	0	0.25
PSPPH_1987	PSPTO_2208	Psyr_2017	CN228_RS18405						0	0	0	0	0
PSPPH_1988	PSPTO_2209	Psyr_2018	CN228_RS18400	PSPPH_4127					1	0	0	0	0.25
PSPPH_1989	PSPTO_2210	Psyr_2019	CN228_RS18390						0	0	0	0	0
PSPPH_1990	PSPTO_2211	Psyr_2020	CN228_RS18385	PSPPH_Irp,PSPPH_2193	DC3000_Irp,DC3000_2193				2	2	0	0	1
PSPPH_1991									0	0	0	0	0
PSPPH_1992	PSPTO_2135	Psyr_3887	CN228_RS22685						0	0	0	0	0
PSPPH_1993									0	0	0	0	0
PSPPH_1994	PSPTO_2213	Psyr_2022	CN228_RS18370						0	0	0	0	0
PSPPH_1995	PSPTO_2214	Psyr_2023	CN228_RS18365	PSPPH_Irp,PSPPH_4127			CN228_4127		2	0	0	1	0.75
PSPPH_1996	PSPTO_2215	Psyr_2024	CN228_RS18360						0	0	0	0	0
PSPPH_1997	PSPTO_2216	Psyr_2025	CN228_RS18355						0	0	0	0	0
PSPPH_1998	PSPTO_2217	Psyr_2026	CN228_RS18350	PSPPH_4127	DC3000_4127	B728a_4127	CN228_4127		1	1	1	1	1
[truncated: 3,232 more rows]
